# 1 **Phospho-tuning immunity through Denisovan, modern human and mouse** 2 **TNFAIP3 gene variants**

3  
4 **Authors:** Nathan W. Zammit<sup>1\*</sup>, Owen M. Siggs<sup>1,2\*</sup>, Paul Gray<sup>3,4</sup>, Keisuke Horikawa<sup>5</sup>,  
5 Stephen R. Daley<sup>5^</sup>, David B. Langley<sup>1</sup>, Daniele Cultrone<sup>1</sup>, Elisabeth K. Malle<sup>1</sup>, Stacey N.  
6 Walters<sup>1</sup>, Jeanette E. Villanueva<sup>1</sup>, Joanna Warren<sup>1</sup>, Amanda Russell<sup>1</sup>, Mark J. Cowley<sup>1,16</sup>,  
7 Velimir Gayevskiy<sup>1</sup>, Marcel E. Dinger<sup>1,16</sup>, Claudia Loetsch<sup>1</sup>, Cecile King<sup>1</sup>, Robert Brink<sup>1</sup>,  
8 David Zahra<sup>1</sup>, Geeta Chaudhri<sup>5^</sup>, Gunasegaran Karupiah<sup>5^</sup>, Belinda Whittle<sup>5</sup>, Carla Roots<sup>5</sup>,  
9 Edward Bertram<sup>5</sup>, Michiko Yamada<sup>5</sup>, Yogesh Jeelall<sup>5</sup>, Anselm Enders<sup>5</sup>, Benjamin E. Clifton<sup>6</sup>,  
10 Peter D. Mabbitt<sup>6</sup>, Colin J. Jackson<sup>6</sup>, Susan R. Watson<sup>7</sup>, Craig N. Jenne<sup>7^</sup>, Lewis L. Lanier<sup>7</sup>,  
11 Tim Wiltshire<sup>8</sup>, Matthew H. Spitzer<sup>9^</sup>, Garry P. Nolan<sup>9</sup>, Frank Schmitz<sup>10</sup>, Alan Aderem<sup>10</sup>,  
12 Benjamin T. Porebski<sup>11</sup>, Ashley M. Buckle<sup>11</sup>, , Derek W. Abbott<sup>12</sup>, John B. Ziegler<sup>3,4</sup>, Maria  
13 E. Craig<sup>13,4</sup>, Paul Benitez-Aguirre<sup>13</sup>, Juliana Teo<sup>13</sup>, Melanie Wong<sup>13</sup>, Murray P. Cox<sup>14</sup>,  
14 Wilson Phung<sup>15</sup>, Ingrid E. Wertz<sup>15</sup>, Daniel Christ<sup>1,16</sup>, Christopher C. Goodnow<sup>1,16\*†</sup>, Shane T.  
15 Grey<sup>1,16\*†</sup>

## 16 **Affiliations:**

17 <sup>1</sup>Garvan Institute of Medical Research, 384 Victoria St, Darlinghurst, New South Wales,  
18 2010 Australia

19 <sup>2</sup>Flinders University, Bedford Park, South Australia, 5042 Australia.

20 <sup>3</sup>Sydney Children's Hospital, Randwick NSW, Australia.

21 <sup>4</sup>School of Women's and Children's Health, University of New South Wales, Sydney,  
22 Australia

23 <sup>5</sup>John Curtin School of Medical Research, The Australian National University, Canberra,  
24 Australian Capital Territory, 2601 Australia.

25 <sup>6</sup>Research School of Chemistry, The Australian National University, Acton, Canberra,  
26 Australian Capital Territory, 2601 Australia.

27 <sup>7</sup>Department of Microbiology and Immunology and the Parker Institute for Cancer  
28 Immunotherapy, University of California San Francisco, Parnassus Ave, San Francisco,  
29 California, 94143 USA.

30 <sup>8</sup>Eshelman School of Pharmacy, University of North Carolina, Chapel Hill, NC 27599;

31 <sup>9</sup>Department of Microbiology & Immunology, Stanford University, California, 94350, USA.

32 <sup>10</sup>Seattle Biomedical Research Institute, Seattle, Washington, 98109-5219 USA.

33 <sup>11</sup>Department of Biochemistry and Molecular Biology, Monash University, Clayton, Victoria  
34 3800 Australia.

35 <sup>12</sup>Department of Pathology, Case Western Reserve University School of Medicine,  
36 Cleveland, Ohio 44106

37 <sup>13</sup>The Children's Hospital at Westmead, and Discipline of Child and Adolescent Health,  
38 University of Sydney, Australia.

39 <sup>14</sup>Institute of Fundamental Sciences, Massey University, Palmerston North, New Zealand.

40 <sup>15</sup>Genentech Inc., 1 DNA Way, M/S 40 South San Francisco, California, 94080, USA.

41 <sup>16</sup>St Vincent's Clinical School, The University of New South Wales Sydney, New South  
42 Wales, 2010 Australia.

43 ^present address: SD, Department of Biochemistry and Molecular Biology, Monash  
44 University, Clayton, Victoria 3800 Australia; GC, Research School of Population Health, The  
45 Australian National University, Canberra, Australian Capital Territory, 2601 Australia; &  
46 GK, School of Medicine, The University of Tasmania, Hobart, TAS 7000, Australia; CJ,  
47 Snyder Institute for Chronic Diseases, University of Calgary, AB T2N 4N1; MHS,  
48 Departments of Otolaryngology and Microbiology & Immunology and the Parker Institute  
49 for Cancer Immunotherapy, University of California San Francisco, Parnassus Ave, San  
50 Francisco, California, 94143 USA; FS, Celgene, 1616 Eastlake Ave E, Seattle, USA.

51 †Corresponding authors: Email [c.goodnow@garvan.org.au](mailto:c.goodnow@garvan.org.au) (C.C.G.) or [s.grey@garvan.org.au](mailto:s.grey@garvan.org.au)  
52 (S.T.G.)

53 \*These authors contributed equally to this work.

54 **Abstract:**

55 Resisting or tolerating microbes are alternative strategies to survive infection, but little is  
56 known about the evolutionary mechanisms controlling this balance. Here, genomic analyses  
57 of anatomically modern humans, extinct Denisovan hominins, and mice revealed a series of  
58 missense variants in the immune response inhibitor A20 (encoded by *TNFAIP3*), substituting  
59 non-catalytic residues of the ubiquitin protease domain to diminish IκB-dependent  
60 phosphorylation and activation of A20. Two A20 variants with partial phosphorylation  
61 deficits appeared beneficial: one originating in Denisovans and introgressed in modern  
62 humans throughout Oceania, and another in a mouse strain resistant to Coxsackievirus. By  
63 contrast, a variant with 95% loss of phosphorylation caused spontaneous inflammatory  
64 disease in humans and mice. Analysis of the partial phosphorylation variant in mice revealed  
65 diminished tolerance of bacterial lipopolysaccharide or to poxvirus inoculation as trade-offs  
66 for enhanced immunity.

67

68 **One Sentence Summary:**

69 Modern and ancient variants reveal a genetically tunable element for balancing immunity and  
70 microbial tolerance.

71 **Main Text:**

72 Microbial resistance involves innate and adaptive immune responses that prevent, diminish,  
73 or clear infection, often causing collateral damage to host tissues and increased energy  
74 demands. Studies in plants<sup>1</sup>, and more recently in animals<sup>2,3</sup>, have shown that in some  
75 circumstances it can be more efficient for a host to tolerate microbes rather than resist them.  
76 Microbial tolerance involves homeostatic mechanisms to raise thresholds for initiating  
77 immune responses, to physically separate microbes from host immune receptors, and to repair  
78 damage caused directly by microbes or by collateral inflammation<sup>3-6</sup>. The genetic means by  
79 which microbial resistance and tolerance are balanced remains incompletely understood.  
80 Population genetic modelling predicts that resistance traits favor host polymorphism and  
81 microbial evasion, whereas microbial tolerance traits tend towards fixation in hosts and  
82 microbial mutualism<sup>7</sup>. High mortality in indigenous human populations of Oceania and the  
83 Americas exposed to smallpox demonstrate how a tolerated pathogen in its adapted host can  
84 cause devastating disease when introduced into non-adapted populations<sup>8,9</sup>. An example in  
85 animals can be seen for European rabbits exposed to myxoma poxvirus originating from  
86 South American rabbits<sup>8</sup>. These cases illustrate the importance of fine-tuning microbial  
87 immunity and tolerance during co-evolution of host and microbe, although little is known  
88 about the molecular pathways which underpin it.

89 A binary perspective of the importance of balancing microbial immunity and tolerance comes  
90 from Mendelian gene variants in mice and humans that completely inactivate the function of  
91 one or both alleles of genes such as *CTLA4*, *IL10*, *FOXP3*, or *TNFAIP3*<sup>10-12</sup>. These cause  
92 severe pediatric autoimmune or inflammatory disease, particularly at mucosal barriers where  
93 large microbial populations are normally tolerated, such as the microbial burden that drives  
94 inflammatory pathology in mouse *Tnfaip3* deficiency<sup>6</sup>. Genome-wide and candidate  
95 association studies in humans implicate variants at or near the *TNFAIP3* locus with  
96 susceptibility to autoimmune disease<sup>13</sup>. In contrast to these disease-associated traits, few  
97 examples of beneficial genetic adjustments that decrease microbial tolerance in favor for  
98 heightened immunity exist.

99 A20, encoded by the *TNFAIP3* gene, promotes microbial tolerance as a negative regulator of  
100 NF- $\kappa$ B signaling: an evolutionarily ancient and central pathway for activating innate and  
101 adaptive immune responses<sup>13</sup>. A20 has multiple domains with inhibitory activity against NF-  
102  $\kappa$ B, primarily preventing activation of the central I $\kappa$ B kinase (IKK) by upstream proteins  
103 RIPK1, TRAF6 and NEMO. The A20 ovarian tumor (OTU) domain is a deubiquitin (DUB)  
104 protease that cleaves activating K63-linked ubiquitin chains from RIPK1, TRAF6 or  
105 NEMO<sup>14-16</sup>. The A20 zinc finger 7 domain (ZnF7) binds linear polyubiquitin to suppress IKK  
106 activation, whereas ZnF4 promotes ligation of K48-linked ubiquitin chains to RIPK1,  
107 triggering RIPK1 proteolysis<sup>14,17</sup>. A20 feedback inhibition is induced at two levels: NF- $\kappa$ B  
108 proteins directly induce *TNFAIP3* mRNA, and the inhibitory activities of A20 protein are  
109 enhanced by I $\kappa$ B $\beta$ -induced serine phosphorylation near the ZnF domains, notably S381<sup>18,19</sup>.

110 The role of the A20 OTU domain nevertheless remains enigmatic. The ZnF domains alone  
111 are sufficient for NF- $\kappa$ B inhibitory function in cell-based studies<sup>20,21</sup>, and mice homozygous  
112 for *TNFAIP3* missense variants creating a catalytically inactive OTU domain have little<sup>15,18</sup>  
113 or no evidence<sup>20</sup> of excessive NF- $\kappa$ B signaling. Here we demonstrate that anatomically  
114 modern human, archaic Denisovan, and mouse missense variants in the OTU domain  
115 modulate A20 phosphorylation by IKK, serving as a genetically tunable element with  
116 profound effects on the balance between microbial tolerance and immunity, and evidence of  
117 introgression to high frequencies during human history.

118

## 119 **Modern human A20 OTU variants acquired from Denisovans**

120 Three convergent sequencing studies led us to a unique functional class of A20 missense  
121 variants affecting the OTU domain, separate from the ubiquitin protease catalytic site (Fig.  
122 1A, B; Extended Data Fig. 1). The most subtle allele, comprising T108A (rs376205580  
123 g.138196008A>G) and I207L (rs141807543 g.138196957A>C) missense variants in *cis*, was  
124 identified by whole genome sequencing in four of 85 families in Sydney. The majority of  
125 individuals in our cohort carrying the T108A;I207L allele were healthy family members of  
126 Māori or Pacific Islander ancestry. These variants were rare in a public variant collection  
127 (gnomAD r2.0.2) but most frequent among individuals with an unassigned ancestry  
128 (Extended Data Fig. 2A).

129 We traced the global distribution of the T108A;I207L allele in 279 individuals from the  
130 Simons Genome Diversity Project dataset<sup>22</sup>, revealing high frequencies ranging from 25-75%  
131 among people of Island Southeast Asia and Oceania, but an absence of the allele elsewhere in  
132 the world (Extended Data Fig. 2B, Extended Data Table 1).

133 Unlike Africans or Eurasians, people in Island Southeast Asia and Oceania acquired up to 5%  
134 of their genome from Denisovans: archaic hominins that interbred with modern humans  
135 ~50,000 years ago migrating through Asia to settle the continent of Sahul (now Papua New  
136 Guinea and Australia)<sup>23-26</sup>. Analysis of the high-coverage genome of a Denisovan finger  
137 phalanx from a cave in the Altai Mountains of Siberia<sup>27</sup> revealed homozygous T108A;I207L  
138 variants (Fig. 1C). Both variants were absent from the genome of a Neanderthal who had  
139 inhabited the same cave<sup>28</sup> (Extended Data Table 2), suggesting that T108A and I207L arose  
140 after the divergence of Denisovan and Neanderthal lineages 170,000-700,000 years ago<sup>27</sup>.

141 Multiple Denisovan-derived genomic regions, including one encompassing *TNFAIP3*, bear  
142 strong signatures of introgression in Papuans<sup>25,26,29</sup>. By imputing haplotypes (Extended Data  
143 Table 2) using genotype array data from 514 individuals from indigenous populations across  
144 Island Southeast Asia and Oceania<sup>30</sup>, we found evidence that the Denisovan *TNFAIP3*  
145 haplotype has reached high frequencies in populations east of the Wallace Line, a 50 million  
146 year-old faunal boundary separating organisms of Asiatic and Australian origin via deep  
147 water channels between the two continental shelves (Fig. 1D, E and Extended Data Fig. 3)<sup>31</sup>.  
148 Frequencies ranged from 0% in almost all populations west of the Wallace Line, but reached  
149 100% in 8 Baining individuals from eastern Papua New Guinea. We observed the same  
150 haplotype in 31/144 (22%) of exome-sequenced alleles in Martu Indigenous Australians from  
151 the Pilbara region of Western Australia<sup>32</sup>, implying the haplotype enrichment occurred before  
152 the isolation of Indigenous Australian and Papuan populations. The high frequency in  
153 Polynesia indicates the Denisovan *TNFAIP3* haplotype was retained after admixture with  
154 Austronesian farming populations expanding from mainland Asia starting ~4,000 years ago<sup>33</sup>  
155 in Eastern Indonesia and ~3,000 years ago in the Southwest Pacific<sup>34</sup>.

156 Aside from the two missense variants in the introgressed Denisovan *TNFAIP3* haplotype,  
157 many other non-coding variants could conceivably modulate transcription. Deep sequencing  
158 of cDNA nevertheless revealed equal amounts of *TNFAIP3* mRNA from Denisovan and  
159 modern human alleles in heterozygous leukocytes, with or without TNF $\alpha$  stimulation  
160 (Extended Data Fig. 4). Of the two coding variants, T108A was not predicted  
161 computationally to alter A20 function (Phred-scaled CADD score of 0.002) and occurs in  
162 other vertebrate species (Extended Data Fig. 1). By contrast, I207 is invariant across most  
163 jawed vertebrates, and I207L was predicted to be the most deleterious variant across the  
164 Denisovan *TNFAIP3* haplotype (Phred-scaled CADD score: 23.2; Extended Data Fig. 3E).

165

## 166 **A mouse A20 OTU variant confers heightened resistance to Coxsackievirus**

167 The results above identify an ancient substitution in the A20 OTU domain as apparently  
168 beneficial in human history. Further evidence that A20 OTU domain variants could be  
169 beneficial came from another OTU substitution, I325N, identified in a genome-wide mouse  
170 mutagenesis screen segregating with increased frequencies of circulating CD44<sup>hi</sup>  
171 activated/memory T cells and regulatory T cells (Fig. 2A) in otherwise healthy adult mice.  
172 Detailed analysis revealed the I325N mutation also increased numbers of B cells in the spleen  
173 and peritoneal cavity, and diminished I $\kappa$ B $\alpha$  within B cells, CD8 T cells, NK cells and  
174 dendritic cells (Fig. 2B and Extended Data Fig. 5). Macrophages immortalized from bone  
175 marrow of I325N mutant mice produced more inflammatory cytokines in response to  
176 lipopolysaccharide (LPS) than controls from wild-type mice (Extended Data Fig. 6). In  
177 thymocytes, I325N increased TNF $\alpha$ -induced NF- $\kappa$ B signaling in ways consistent with  
178 diminished A20-mediated inhibition (Extended Data Fig. 7)<sup>18</sup>.

179 In wild-type mice transplanted with mixtures of mutant and wild-type A20 bone marrow, the  
180 I325N mutation acted cell autonomously to increase B cell activation and proliferation by  
181 LPS or antigen receptors, and to increase TCR and CD28-dependent formation of FOXP3<sup>+</sup>  
182 CD4<sup>+</sup> regulatory T cells and their Helios<sup>+</sup> FOXP3<sup>-</sup> precursors within the thymus (Fig. 2C, D,  
183 Extended Data Fig. 8). Surprisingly, I325N had a greater effect than the C103A OTU domain  
184 mutation analyzed in parallel bone marrow transplant recipients, despite C103A completely  
185 inactivating the polyubiquitin protease activity of A20<sup>15,20</sup>, indicating I325N must diminish  
186 additional inhibitory mechanisms.

187 Consistent with heightened cellular markers of immunity, I325N mutant mice had greater  
188 resistance to Coxsackievirus B4 strain E2, a virus isolated from a human neonate with a  
189 disseminated fatal infection causing extensive pancreatic necrosis<sup>35,36</sup>. A virus dose that was  
190 lethal for 90% of wild-type C57BL/6 mice was not lethal for *Tnfaip3*<sup>I325N/I325N</sup> littermates, and  
191 caused less mortality in *Tnfaip3*<sup>I325N/+</sup> mice (Fig. 2E; Extended Data Fig. 9A). Mutant mice  
192 had less infectious virus and viral RNA in the pancreas, less mRNA encoding immune  
193 response cytokines IL-1 $\beta$  and IFN $\beta$ , less pancreatic necrosis, higher serum IL-6, and  
194 preserved body-weight and euglycemia (Fig. 2F, G; Extended Data Fig. 9B-G).

195 The homogeneous genetic background of I325N mutant mice allowed testing if heightened  
196 immunity imposed a subclinical cost or altered the insulin anabolic axis<sup>37</sup>. *Tnfaip3*<sup>I325N/+</sup> mice  
197 were healthy, of normal weight, and fertile, producing homozygous mutant offspring at the  
198 expected ratio. Homozygotes also appeared healthy, although their body weight was 5-20%  
199 less than heterozygous or wild-type littermates (Fig. 3A), with histological analysis revealing  
200 low-grade inflammation of the pancreatic islets, colon, kidney, and liver (Fig. 3B-C,  
201 Extended Data Fig. 10). Pancreatic insulinitis in I325N homozygotes was associated with a  
202 50% reduction in beta cell mass (Fig. 3D), although random blood glucose levels and glucose  
203 tolerance tests were normal (Extended Data Fig. 11A-E). Isolated *Tnfaip3*<sup>I325N/I325N</sup> islets  
204 exhibited normal basal insulin output but reduced insulin secretion when stimulated *in vitro*  
205 (Extended Data Fig. 11F). Islet transplant and culture experiments showed the A20 mutation  
206 acted within islet cells, exaggerating canonical and non-canonical NF- $\kappa$ B signaling, lowering  
207 insulin secretion, and increasing inflammatory cytokine production (Fig. 3E-H and Extended  
208 Data Fig. 11G-I & 12)<sup>38</sup>.

209

210

211

## 212 **An allelic series of OTU domain variants with graded reductions of A20** 213 **phosphorylation**

214 The apparent beneficial effects of the T108A;I207L and I325N OTU domain substitutions  
215 above contrasted with a third OTU domain substitution, C243Y, found as a family-specific  
216 variant causing dominant Mendelian inflammation resembling Behçet's disease, with  
217 childhood-onset oral and genital ulceration and skin inflammation<sup>39</sup>. The biochemical basis  
218 for the clinically penetrant effects of C243Y was obscure, because other similarly affected  
219 cases of haploinsufficiency of A20 (HA20) result from nonsense or frameshift variants that  
220 truncate or eliminate A20 protein<sup>12</sup>.

221 Despite different clinical consequences, the three OTU domain variants formed a graded  
222 biochemical allelic series when full-length A20 and IKK $\beta$  were co-expressed in mouse  
223 insulinoma cells and S381-phosphorylated A20 was compared with total A20 protein by  
224 Western blotting. None of the variants affected A20 protein accumulation but each affected  
225 IKK $\beta$ -mediated S381 phosphorylation (Fig. 4A-C; Extended Data Fig. 13A). The pathogenic  
226 C243Y variant caused the most severe loss of function, diminishing IKK $\beta$ -mediated S381  
227 phosphorylation to 5% of wild-type, whereas the Denisovan T108A;I207L variant diminished  
228 phosphorylation the least (80% of wild-type) and the non-pathogenic I325N variant had an  
229 intermediate effect (50% of wild-type). By contrast, the C103A catalytic site substitution did  
230 not cause a significant decrease in A20 phosphorylation. Loss of S381 phosphorylation was  
231 also observed by mass spectrometry of A20 purified from unstimulated human cells  
232 transfected with A20<sup>I325N</sup> compared to A20<sup>WT</sup>, whereas A20<sup>C103A</sup> exhibited normal  
233 phosphorylation (Extended Data Fig. 13B).

234 S381-phosphorylated A20 predominantly migrated more slowly in SDS-PAGE than  
235 unphosphorylated A20, either when tested by co-transfection with IKK $\beta$  (Fig. 4A, B) or in  
236 TNF $\alpha$ -stimulated peripheral blood leukocytes with endogenous A20 and IKK $\beta$  (Fig. 4D,  
237 S14). The ratio of this slowly migrating A20 species to the more rapidly migrating form was  
238 markedly decreased in blood leukocytes from healthy donors heterozygous for the Denisovan  
239 T108A;I207L variants, and further decreased in a healthy T108A;I207L homozygous donor,  
240 compared to healthy controls without these variants (Fig. 4E). The ratio of phosphorylated-  
241 S381 to fast-migrating A20 was also decreased (Extended Data Fig. 14F). TNF- $\alpha$  stimulated  
242 leukocytes from variant carriers also had heightened expression of NF- $\kappa$ B-induced transcripts  
243 of *ICAM1*, *CXCL2*, *TNF*, and *TNFAIP3* itself (Extended Data Fig. 15), and a trend towards  
244 reduced I $\kappa$ B $\alpha$  protein levels (Extended Data Fig. 14H).

245 When A20 was measured for inhibition of an NF- $\kappa$ B luciferase reporter in unstimulated or  
246 TNF $\alpha$ -stimulated mouse insulinoma cells, inhibition was diminished in a graded fashion by  
247 each OTU domain variant in the same order that these diminished S381 phosphorylation (Fig.  
248 4F; Extended Data Fig. 13C). The deleterious C243Y variant was the most compromised  
249 inhibitor of the series, almost as compromised as A20 with S381 substituted to non-  
250 phosphorylatable alanine (S381A). Combining the intermediate I325N mutation with a  
251 S381A mutation *in cis* did not cause a further decrease in A20 inhibition, consistent with  
252 I325N having its effect upon phosphorylation. That conclusion was reinforced by combining  
253 I325N *in cis* with a substitution of S381 to the phosphoserine mimetic glutamate (S381E),  
254 which rescued the lost activity caused by I325N (Extended Data Fig. 13D, E). Testing the  
255 two Denisovan variants individually, T108A had no measurable effect whereas I207L  
256 diminished A20 inhibitory activity comparably to the two variants combined (Extended Data  
257 Fig. 13F), supporting I207L as the functional variant within the introgressed Denisovan  
258 haplotype.

259 To explore the structural and biochemical consequences of variants on the posterior surface  
260 of the OTU domain, we focused on the intermediate I325N allele. Crystallographic structures  
261 of A20 OTU domains with wild-type I325 or mutant N325 revealed no differences in features  
262 with known functions, including the catalytic triad and ubiquitin-binding surface (Fig. 1B;  
263 Extended Data Fig. 16A-C). I325N also did not alter the conserved posterior surface of the  
264 OTU domain<sup>40</sup>, including the  $\beta$ 3- $\beta$ 4 loop containing C243 (Extended Data Fig. 16G),  
265 although there were subtle shifts in the stem of the  $\beta$ 7- $\beta$ 8 loop, which contains conserved  
266 surface residues T321, T322 and L324 (Extended Data Fig. 16D-G). The  $\beta$ 7- $\beta$ 8 loop itself is  
267 disordered in all available OTU structures but, like the disordered loops in the unliganded S1  
268 ubiquitin-binding site, it may undergo conformational changes upon binding a cognate  
269 partner that are hindered by the I325N variant. Wild-type and variant OTU domains exhibited  
270 similar thermal denaturation profiles (Extended Data Fig. 17A-C), and the corresponding  
271 full-length proteins were comparably stable in cycloheximide-treated mammalian cells  
272 (Extended Data Fig. 17D). I325N did not decrease DUB activity of bacterially expressed  
273 OTU domain against K48-polyubiquitin *in vitro* (Extended Data Fig. 17E-G), but I325N  
274 diminished K63-polyubiquitin DUB activity and K48-ubiquitin ligase activity when full  
275 length A20 was expressed in human cells (Extended Data Fig. 17H, I) consistent with these  
276 activities requiring S381 phosphorylation<sup>18,19</sup>.

277

### 278 **Shift from beneficial to detrimental loss of microbial tolerance**

279 We next explored the possibility that partial loss of A20 phosphorylation and subclinical loss  
280 of microbial tolerance might become detrimental in particular environmental or genetic  
281 settings. In an experimental model for septic shock, I325N homozygous mice had increased  
282 IL-6 production and high mortality following injection of a dose of bacterial LPS that was not  
283 lethal in wild-type controls (Fig. 5A, B). In the rodent counterpart of smallpox, infection with  
284 the orthopoxvirus ectromelia virus was tolerated and controlled by wild-type mice, yet  
285 resulted in high mortality and higher viral titres in I325N homozygotes (Fig. 5C, D and  
286 Extended Data Fig. 18). In bone marrow chimeric mice with a higher frequency of pancreatic  
287 islet-reactive CD4<sup>+</sup> T cells, autoreactive T cells escaped deletion and precipitated diabetes  
288 when half the hematopoietic cells were homozygous for I325N (Extended Data Fig. 19A-C).  
289 The rogue islet-reactive T cells were nevertheless derived equally from A20 wild-type or  
290 I325N precursors, whereas I325N acted cell autonomously to increase MHC II and the T cell  
291 costimulator CD86 on B cells and dendritic cells and to increase frequencies of germinal  
292 centre B cells (Extended Data Fig. 19D-F).

293 While specific stressors were required to reveal detrimental effects of the intermediate I325N  
294 variant, wasting disease occurred spontaneously in young C57BL/6 mice homozygous for the  
295 severe C243Y variant. C243Y homozygotes were born at the expected Mendelian ratio but  
296 compared to wild-type littermates failed to thrive, exhibiting a large reduction in body weight  
297 and early lethality (Fig. 5E, F; Extended Data Fig. 20). Surviving C243Y homozygotes  
298 showed intestinal pathology including loss of goblet cells responsible for sustaining the  
299 mucin barrier between epithelium and microbes of the intestinal lumen, along with an  
300 increased frequency of circulating CD44<sup>hi</sup> activated/memory T cells (Extended Data Fig. 20).  
301 C243Y homozygous mice thus resemble A20-null mice<sup>5,11</sup>, paralleling the clinical similarity  
302 between C243Y missense and A20 loss-of-function variants in heterozygous humans<sup>12</sup>.



## 303 Discussion

304 Our findings reveal genetic and biochemical mechanisms for adaptively increasing immunity,  
305 with trade-offs against microbial tolerance and anabolic metabolism that either remain  
306 clinically silent or become detrimental in specific contexts. Three different missense alleles in  
307 the N-terminal A20 OTU domain act, to different degrees, by diminishing A20  
308 phosphorylation and tuning down A20's immune inhibitory activity. A rare human variant,  
309 C243Y, diminishes phosphorylation almost entirely and shifts the balance away from  
310 microbial tolerance to the extremes of immunity, resulting in severe inflammatory disease in  
311 both mice and humans. This outcome is comparable with other human variants that eliminate  
312 or truncate A20 protein from one *TNFAIP3* allele or engineered mouse variants that eliminate  
313 A20 from both alleles<sup>11,12</sup>. By contrast, I325N and I207L variants decrease A20  
314 phosphorylation more modestly, without precipitating spontaneous inflammatory disease in  
315 the mice or humans who harbor them. I325N in the mouse confers dramatically increased  
316 resistance to an otherwise lethal dose of a Coxsackievirus. A similar resistance to microbial  
317 pathogens may explain the beneficial effect of Denisovan I207L, as evidenced by its high  
318 frequency in modern human populations east of the Wallace Line, who likely encountered  
319 new infectious agents as they moved into environments with unique fauna and flora.

320 Previous studies in mice have conditionally deleted A20 in specific tissues, causing severe  
321 inflammatory disease, or directly disabled individual enzymatic functions of A20 in all  
322 tissues resulting in surprisingly little inflammation<sup>5,6,11,15,18,20</sup>. By contrast, OTU domain  
323 variants tuning phosphorylation regulate multiple ubiquitin-editing functions of A20<sup>18,19</sup>, and  
324 as shown here have greater effects on microbial tolerance and resistance *in vivo* than variants  
325 affecting individual ubiquitin-editing activities. The C243Y and I325N variants involve  
326 buried residues in two separate surface loops,  $\beta$ 3- $\beta$ 4 and  $\beta$ 7- $\beta$ 8 respectively (Extended Data  
327 Fig. 16), on the highly conserved posterior surface of the OTU domain<sup>40</sup>. Structural studies of  
328 full-length A20 protein may illuminate how this surface relates to the C-terminal domain  
329 carrying S381. Because the conserved surface bounded by C243Y and I325N is large, it  
330 potentially offers many opportunities for substitution of buried or surface residues to tune  
331 immunity and tolerance.

332 Our study of the intermediate loss-of-function A20 variant, I325N, provides two examples of  
333 genetic trade-offs. The first was with glucose metabolism, where *Tnfaip3*<sup>I325N</sup> had the  
334 surprising effect within pancreatic islet beta cells of decreasing insulin secretion while  
335 increasing inflammation. This is reminiscent of findings in *Drosophila* that insulin production  
336 or action decreases during infection, diminishing body glycogen supplies through increased  
337 FOXO activity, a transcriptional inducer of starvation responses<sup>37</sup>. Resting insulin levels are a  
338 good prognostic marker in human sepsis, and exogenous insulin treatment improves  
339 outcome<sup>41</sup>. Subtly decreased A20 activity may enhance immune demands for energy and,  
340 separately, help meet these energy demands by lowering insulin-induced anabolic growth,  
341 both contributing to cachexia associated with chronic infection and inflammation.

342 The second example of a trade-off is the experimental demonstration that a beneficial trait in  
343 one context can be deleterious in another. *Tnfaip3*<sup>I325N</sup> conferred increased resistance to  
344 Coxsackievirus, an important human enterovirus, but increased mortality to ectromelia virus,  
345 a relative of variola and myxoma viruses. Higher ectromelia virus mortality in *Tnfaip3*<sup>I325N</sup>  
346 mice is reminiscent of the high mortality in indigenous populations of the Americas and  
347 Oceania exposed to variola virus relative to Europeans<sup>8</sup>. The findings here suggest that the  
348 devastation wrought by these and other microbes reflects selection during earlier  
349 environmental conditions for lower microbial tolerance and a stronger immune response, with  
350 A20 representing one critical determinant of this outcome.

## 351 **References and Notes:**

### 352 Main text references 1-42

353

- 354 1 Caldwell, R. M., Schafer, J. F., Compton, L. E. & Patterson, F. L. Tolerance to Cereal Leaf Rusts.  
355 *Science* **128**, 714-715, doi:10.1126/science.128.3326.714 (1958).
- 356 2 Ayres, J. S. & Schneider, D. S. Tolerance of infections. *Annu Rev Immunol* **30**, 271-294,  
357 doi:10.1146/annurev-immunol-020711-075030 (2012).
- 358 3 Soares, M. P., Teixeira, L. & Moita, L. F. Disease tolerance and immunity in host protection against  
359 infection. *Nat Rev Immunol* **17**, 83-96, doi:10.1038/nri.2016.136 (2017).
- 360 4 Hooper, L. V., Littman, D. R. & Macpherson, A. J. Interactions between the microbiota and the  
361 immune system. *Science* **336**, 1268-1273, doi:10.1126/science.1223490 (2012).
- 362 5 Vereecke, L. *et al.* A20 controls intestinal homeostasis through cell-specific activities. *Nature*  
363 *communications* **5**, 5103, doi:10.1038/ncomms6103 (2014).
- 364 6 Turer, E. E. *et al.* Homeostatic MyD88-dependent signals cause lethal inflammation in the absence of  
365 A20. *J Exp Med* **205**, 451-464, doi:10.1084/jem.20071108 (2008).
- 366 7 Roy, B. A. & Kirchner, J. W. Evolutionary dynamics of pathogen resistance and tolerance. *Evolution*  
367 **54**, 51-63 (2000).
- 368 8 Fenner, F. The Florey lecture, 1983. Biological control, as exemplified by smallpox eradication and  
369 myxomatosis. *Proc R Soc Lond B Biol Sci* **218**, 259-285 (1983).
- 370 9 Boughton, C. R. Smallpox and Australia. *Intern Med J* **32**, 59-61 (2002).
- 371 10 Bousfiha, A. *et al.* The 2017 IUIS Phenotypic Classification for Primary Immunodeficiencies. *J Clin*  
372 *Immunol* **38**, 129-143, doi:10.1007/s10875-017-0465-8 (2018).
- 373 11 Lee, E. G. *et al.* Failure to regulate TNF-induced NF-kappaB and cell death responses in A20-deficient  
374 mice. *Science* **289**, 2350-2354 (2000).
- 375 12 Zhou, Q. *et al.* Loss-of-function mutations in TNFAIP3 leading to A20 haploinsufficiency cause an  
376 early-onset autoinflammatory disease. *Nat Genet* **48**, 67-73, doi:10.1038/ng.3459 (2016).
- 377 13 Ma, A. & Malynn, B. A. A20: linking a complex regulator of ubiquitylation to immunity and human  
378 disease. *Nat Rev Immunol* **12**, 774-785, doi:nri3313 [pii]10.1038/nri3313 (2012).
- 379 14 Wertz, I. E. *et al.* De-ubiquitination and ubiquitin ligase domains of A20 downregulate NF-kappaB  
380 signalling. *Nature* **430**, 694-699, doi:10.1038/nature02794nature02794 [pii] (2004).
- 381 15 Lu, T. T. *et al.* Dimerization and ubiquitin mediated recruitment of a20, a complex deubiquitinating  
382 enzyme. *Immunity* **38**, 896-905, doi:S1074-7613(13)00146-5 [pii]10.1016/j.immuni.2013.03.008  
383 (2013).
- 384 16 Evans, P. C. *et al.* Zinc-finger protein A20, a regulator of inflammation and cell survival, has de-  
385 ubiquitinating activity. *Biochem J* **378**, 727-734, doi:10.1042/BJ20031377BJ20031377 [pii] (2004).
- 386 17 Bosanac, I. *et al.* Ubiquitin binding to A20 ZnF4 is required for modulation of NF-kappaB signaling.  
387 *Mol Cell* **40**, 548-557, doi:S1097-2765(10)00785-9 [pii]10.1016/j.molcel.2010.10.009 (2010).
- 388 18 Wertz, I. E. *et al.* Phosphorylation and linear ubiquitin direct A20 inhibition of inflammation. *Nature*  
389 **528**, 370-375, doi:10.1038/nature16165 (2015).
- 390 19 Huttli, J. E. *et al.* IkappaB kinase beta phosphorylates the K63 deubiquitinase A20 to cause feedback  
391 inhibition of the NF-kappaB pathway. *Mol Cell Biol* **27**, 7451-7461 (2007).
- 392 20 De, A., Dainichi, T., Rathinam, C. V. & Ghosh, S. The deubiquitinase activity of A20 is dispensable  
393 for NF-kappaB signaling. *EMBO Rep* **15**, 775-783, doi:10.15252/embr.201338305 (2014).
- 394 21 Verhelst, K. *et al.* A20 inhibits LUBAC-mediated NF-kappaB activation by binding linear  
395 polyubiquitin chains via its zinc finger 7. *EMBO J* **31**, 3845-3855, doi:emboj2012240  
396 [pii]10.1038/emboj.2012.240 (2012).
- 397 22 Mallick, S. *et al.* The Simons Genome Diversity Project: 300 genomes from 142 diverse populations.  
398 *Nature* **538**, 201-206, doi:10.1038/nature18964 (2016).
- 399 23 Reich, D. *et al.* Genetic history of an archaic hominin group from Denisova Cave in Siberia. *Nature*  
400 **468**, 1053-1060, doi:10.1038/nature09710 (2010).
- 401 24 Reich, D. *et al.* Denisova admixture and the first modern human dispersals into Southeast Asia and  
402 Oceania. *American journal of human genetics* **89**, 516-528, doi:10.1016/j.ajhg.2011.09.005 (2011).
- 403 25 Sankararaman, S., Mallick, S., Patterson, N. & Reich, D. The Combined Landscape of Denisovan and  
404 Neanderthal Ancestry in Present-Day Humans. *Curr Biol* **26**, 1241-1247,  
405 doi:10.1016/j.cub.2016.03.037 (2016).
- 406 26 Vernot, B. *et al.* Excavating Neandertal and Denisovan DNA from the genomes of Melanesian  
407 individuals. *Science* **352**, 235-239, doi:10.1126/science.aad9416 (2016).
- 408 27 Meyer, M. *et al.* A high-coverage genome sequence from an archaic Denisovan individual. *Science*  
409 **338**, 222-226, doi:10.1126/science.1224344 (2012).

- 410 28 Prufer, K. *et al.* The complete genome sequence of a Neanderthal from the Altai Mountains. *Nature*  
411 **505**, 43-49, doi:10.1038/nature12886 (2014).
- 412 29 Gittelman, R. M. *et al.* Archaic Hominin Admixture Facilitated Adaptation to Out-of-Africa  
413 Environments. *Curr Biol* **26**, 3375-3382, doi:10.1016/j.cub.2016.10.041 (2016).
- 414 30 Hudjashov, G. *et al.* Complex Patterns of Admixture across the Indonesian Archipelago. *Mol Biol Evol*  
415 **34**, 2439-2452, doi:10.1093/molbev/msx196 (2017).
- 416 31 Wallace, A. R. On the physical geography of the Malay archipelago. *The Journal of the Royal*  
417 *Geographical Society of London* **33**, 217-234 (1863).
- 418 32 Tang, D. *et al.* Reference genotype and exome data from an Australian Aboriginal population for  
419 health-based research. *Sci Data* **3**, 160023, doi:10.1038/sdata.2016.23 (2016).
- 420 33 Xu, S. *et al.* Genetic dating indicates that the Asian-Papuan admixture through Eastern Indonesia  
421 corresponds to the Austronesian expansion. *Proc Natl Acad Sci U S A* **109**, 4574-4579,  
422 doi:10.1073/pnas.1118892109 (2012).
- 423 34 Skoglund, P. *et al.* Genomic insights into the peopling of the Southwest Pacific. *Nature* **538**, 510-513,  
424 doi:10.1038/nature19844 (2016).
- 425 35 Kibrick, S. & Benirschke, K. Severe generalized disease (encephalohepatomyocarditis) occurring in the  
426 newborn period and due to infection with Coxsackie virus, group B; evidence of intrauterine infection  
427 with this agent. *Pediatrics* **22**, 857-875 (1958).
- 428 36 Hartig, P. C. & Webb, S. R. Heterogeneity of a human isolate of Coxsackie B4: biological differences.  
429 *J Infect* **6**, 43-48 (1983).
- 430 37 Dionne, M. S., Pham, L. N., Shirasu-Hiza, M. & Schneider, D. S. Akt and FOXO dysregulation  
431 contribute to infection-induced wasting in *Drosophila*. *Curr Biol* **16**, 1977-1985,  
432 doi:10.1016/j.cub.2006.08.052 (2006).
- 433 38 Malle, E. K. *et al.* Nuclear factor kappaB-inducing kinase activation as a mechanism of pancreatic beta  
434 cell failure in obesity. *J Exp Med* **212**, 1239-1254, doi:10.1084/jem.20150218 (2015).
- 435 39 Shigemura, T. *et al.* Novel heterozygous C243Y A20/TNFAIP3 gene mutation is responsible for  
436 chronic inflammation in autosomal-dominant Behcet's disease. *RMD Open* **2**, e000223,  
437 doi:10.1136/rmdopen-2015-000223 (2016).
- 438 40 Komander, D. & Barford, D. Structure of the A20 OTU domain and mechanistic insights into  
439 deubiquitination. *Biochem J* **409**, 77-85, doi:BJ20071399 [pii]10.1042/BJ20071399 (2008).
- 440 41 van den Berghe, G. *et al.* Intensive insulin therapy in critically ill patients. *N Engl J Med* **345**, 1359-  
441 1367, doi:10.1056/NEJMoa011300 (2001).
- 442 42 Mevissen, T. E. *et al.* Molecular basis of Lys11-polyubiquitin specificity in the deubiquitinase  
443 Cezanne. *Nature* **538**, 402-405, doi:10.1038/nature19836 (2016).
- 444

#### 445 **References cited in Materials and Methods and Extended Data:**

- 446 43 McKenna, A. *et al.* The Genome Analysis Toolkit: a MapReduce framework for analyzing next-  
447 generation DNA sequencing data. *Genome Res* **20**, 1297-1303, doi:10.1101/gr.107524.110 (2010).
- 448 44 McLaren, W. *et al.* The Ensembl Variant Effect Predictor. *Genome Biol* **17**, 122, doi:10.1186/s13059-  
449 016-0974-4 (2016).
- 450 45 MacArthur, D. G. *et al.* A systematic survey of loss-of-function variants in human protein-coding  
451 genes. *Science* **335**, 823-828, doi:10.1126/science.1215040 (2012).
- 452 46 Paila, U., Chapman, B. A., Kirchner, R. & Quinlan, A. R. GEMINI: integrative exploration of genetic  
453 variation and genome annotations. *PLoS Comput Biol* **9**, e1003153, doi:10.1371/journal.pcbi.1003153  
454 (2013).
- 455 47 Gayevskiy, V., Roscioli, T., Dinger, M. E. & Cowley, M. J. Seave: a comprehensive web platform for  
456 storing and interrogating human genomic variation. *bioRxiv*, doi:10.1101/258061 (2018).
- 457 48 Thorvaldsdottir, H., Robinson, J. T. & Mesirov, J. P. Integrative Genomics Viewer (IGV): high-  
458 performance genomics data visualization and exploration. *Brief Bioinform* **14**, 178-192,  
459 doi:10.1093/bib/bbs017 (2013).
- 460 49 Kircher, M. *et al.* A general framework for estimating the relative pathogenicity of human genetic  
461 variants. *Nat Genet* **46**, 310-315, doi:10.1038/ng.2892 (2014).
- 462 50 Ho, W. Y., Cooke, M. P., Goodnow, C. C. & Davis, M. M. Resting and anergic B cells are defective in  
463 CD28-dependent costimulation of naive CD4+ T cells. *J Exp Med* **179**, 1539-1549 (1994).
- 464 51 Akkaraju, S. *et al.* A range of CD4 T cell tolerance: partial inactivation to organ-specific antigen allows  
465 nondestructive thyroiditis or insulinitis. *Immunity* **7**, 255-271 (1997).
- 466 52 Tahiliani, V., Chaudhri, G., Eldi, P. & Karupiah, G. The orchestrated functions of innate leukocytes  
467 and T cell subsets contribute to humoral immunity, virus control, and recovery from secondary  
468 poxvirus challenge. *J Virol* **87**, 3852-3861, doi:10.1128/JVI.03038-12 (2013).

- 469 53 Wang, G. G. *et al.* Quantitative production of macrophages or neutrophils ex vivo using conditional  
470 Hoxb8. *Nat Methods* **3**, 287-293, doi:10.1038/nmeth865 (2006).
- 471 54 Cantley, J. *et al.* A preexistent hypoxic gene signature predicts impaired islet graft function and glucose  
472 homeostasis. *Cell Transplant* **22**, 2147-2159, doi:10.3727/096368912X658728 (2013).
- 473 55 Grey, S. T., Lock, J., Bach, F. H. & Ferran, C. Adenovirus-mediated gene transfer of A20 in murine  
474 islets inhibits Fas-induced apoptosis. *Transplant Proc* **33**, 577-578, doi:S0041-1345(00)02149-7 [pii]  
475 (2001).
- 476 56 Grey, S. T. *et al.* Genetic engineering of a suboptimal islet graft with A20 preserves beta cell mass and  
477 function. *J Immunol* **170**, 6250-6256 (2003).
- 478 57 Daley, S. R., Hu, D. Y. & Goodnow, C. C. Helios marks strongly autoreactive CD4+ T cells in two  
479 major waves of thymic deletion distinguished by induction of PD-1 or NF-kappaB. *J Exp Med* **210**,  
480 269-285, doi:10.1084/jem.20121458 (2013).
- 481 58 Jeelall, Y. S. *et al.* Human lymphoma mutations reveal CARD11 as the switch between self-antigen-  
482 induced B cell death or proliferation and autoantibody production. *J Exp Med* **209**, 1907-1917,  
483 doi:10.1084/jem.20112744 (2012).
- 484 59 Bendall, S. C. *et al.* Single-cell mass cytometry of differential immune and drug responses across a  
485 human hematopoietic continuum. *Science* **332**, 687-696, doi:10.1126/science.1198704 (2011).
- 486 60 Bodenmiller, B. *et al.* Multiplexed mass cytometry profiling of cellular states perturbed by small-  
487 molecule regulators. *Nature biotechnology* **30**, 858-867, doi:10.1038/nbt.2317 (2012).
- 488 61 Qiu, P. *et al.* Extracting a cellular hierarchy from high-dimensional cytometry data with SPADE.  
489 *Nature biotechnology* **29**, 886-891, doi:10.1038/nbt.1991 (2011).
- 490 62 Untergasser, A. *et al.* Primer3--new capabilities and interfaces. *Nucleic Acids Res* **40**, e115,  
491 doi:10.1093/nar/gks596 (2012).
- 492 63 Liuwantara, D. *et al.* Nuclear factor-kappaB regulates beta-cell death: a critical role for A20 in beta-  
493 cell protection. *Diabetes* **55**, 2491-2501, doi:55/9/2491 [pii]10.2337/db06-0142 (2006).
- 494 64 Tan, B. M. *et al.* Baculoviral inhibitors of apoptosis repeat containing (BIRC) proteins fine-tune TNF-  
495 induced nuclear factor kappaB and c-Jun N-terminal kinase signalling in mouse pancreatic beta cells.  
496 *Diabetologia* **56**, 520-532, doi:10.1007/s00125-012-2784-x (2013).
- 497 65 Leslie, A. G. W. & Powell, H. R. Processing diffraction data with MOSFLM. *Nato Sci Ser Ii Math* **245**,  
498 41-51 (2007).
- 499 66 Evans, P. R. An introduction to data reduction: space-group determination, scaling and intensity  
500 statistics. *Acta Crystallogr D* **67**, 282-292, doi:Doi 10.1107/S090744491003982x (2011).
- 501 67 Evans, P. R. & Murshudov, G. N. How good are my data and what is the resolution? *Acta Crystallogr*  
502 *D* **69**, 1204-1214, doi:Doi 10.1107/S0907444913000061 (2013).
- 503 68 Evans, P. Scaling and assessment of data quality. *Acta crystallographica. Section D, Biological*  
504 *crystallography* **62**, 72-82, doi:10.1107/S0907444905036693 (2006).
- 505 69 Winn, M. D. *et al.* Overview of the CCP4 suite and current developments. *Acta Crystallogr D* **67**, 235-  
506 242, doi:Doi 10.1107/S0907444910045749 (2011).
- 507 70 McCoy, A. J. *et al.* Phaser crystallographic software. *Journal of applied crystallography* **40**, 658-674,  
508 doi:10.1107/S0021889807021206 (2007).
- 509 71 Murshudov, G. N. *et al.* REFMAC5 for the refinement of macromolecular crystal structures. *Acta*  
510 *Crystallogr D* **67**, 355-367, doi:Doi 10.1107/S0907444911001314 (2011).
- 511 72 Adams, P. D. *et al.* PHENIX: a comprehensive Python-based system for macromolecular structure  
512 solution. *Acta crystallographica. Section D, Biological crystallography* **66**, 213-221,  
513 doi:10.1107/S0907444909052925 (2010).
- 514 73 Terwilliger, T. C. *et al.* Iterative-build OMIT maps: map improvement by iterative model building and  
515 refinement without model bias. *Acta crystallographica. Section D, Biological crystallography* **64**, 515-  
516 524, doi:10.1107/S0907444908004319 (2008).
- 517 74 Emsley, P., Lohkamp, B., Scott, W. G. & Cowtan, K. Features and development of Coot. *Acta*  
518 *Crystallogr D* **66**, 486-501, doi:Doi 10.1107/S0907444910007493 (2010).
- 519 75 Chen, V. B. *et al.* MolProbity: all-atom structure validation for macromolecular crystallography. *Acta*  
520 *Crystallogr D* **66**, 12-21, doi:Doi 10.1107/S0907444909042073 (2010).
- 521 76 Zoldak, G., Zubrik, A., Musatov, A., Stupak, M. & Sedlak, E. Irreversible thermal denaturation of  
522 glucose oxidase from *Aspergillus niger* is the transition to the denatured state with residual structure. *J*  
523 *Biol Chem* **279**, 47601-47609, doi:10.1074/jbc.M406883200 (2004).
- 524 77 Cowley, M. J. *et al.* Human Islets Express a Marked Pro-Inflammatory Molecular Signature Prior to  
525 Transplantation. *Cell Transplant* **21**, 2063-2078, doi:cowleyct0181 [pii]10.3727/096368911X627372  
526 (2012).
- 527 78 Shim, J. H. *et al.* TAK1, but not TAB1 or TAB2, plays an essential role in multiple signaling pathways  
528 in vivo. *Genes Dev* **19**, 2668-2681, doi:gad.1360605 [pii]10.1101/gad.1360605 (2005).

529 **Acknowledgments:** This manuscript is dedicated to the memory of Susan Watson, who led  
530 the isolation of the I325N mouse. We wish to thank the National Computational  
531 Infrastructure, Xenon systems, Nvidia, and the Multi-modal Australian ScienceS Imaging and  
532 Visualisation Environment (MASSIVE) ([www.massive.org.au](http://www.massive.org.au)) for compute resources. We  
533 thank Oliver Venn, Iain Mathieson, Bastien Llamas, Yassine Souilmi, Raymond Tobler and  
534 Alan Cooper for stimulating discussions. CNJ thanks Jason Cyster for mentorship. We thank  
535 Wendy Sandoval for assistance with A20 phosphorylation site mass spectrometry, and Kim  
536 Newton and Vishva Dixit for reagents. This study makes use of data generated by the  
537 Telethon Kids Institute. A full list of the investigators who contributed to the generation of  
538 the data is available from <http://bioinformatics.childhealthresearch.org.au/AGHS>.

539

540 **Funding:** N.W.Z was supported by an Australian Postgraduate Award and is supported by  
541 the International Pancreas and Islet Transplant Association (IPITA) Derek Gray Scholarship.  
542 A.M.B. is a National Health and Medical Research (NHMRC) Senior Research Fellow  
543 (1022688). C.C.G. is supported by the Bill and Patricia Ritchie Chair and by an NHMRC  
544 Senior Principal Research Fellowship. S.T.G. is supported by an NHMRC Senior Research  
545 Fellowship. The research was supported by grants to C.C.G. from the NIH (AI52127,  
546 AI054523, AI100627) and NHMRC (1016953, 585490, 1081858), to S.T.G. from the NIH  
547 (DK076169) and NHMRC (1130222, 1140691).

548

549 **Author contributions:** Human family recruitment and genome sequence analysis: PG, JBZ,  
550 MEC, PB-A, JT, MW, OMS, AR, MJC, VG, MED, CCG. Tracing Denisovan haplotype in  
551 human populations by OMS, PG, AR, MPC, CCG; peripheral blood analyses by NWZ, AR,  
552 CCG, STG. I325N mutation: identification by SRW, CNJ, LLL, TW, CR, BW, CCG;  
553 immune cell analysis by KH, SRD, YJ, NWZ, MY, EB, AE, MHS, GPN, FS, DEZ, AA,  
554 IEW, STG, CCG; Coxsackievirus studies by NWZ, CL, JW, CK, STG; Ectromelia studies by  
555 GC, GK; body weight, islet, LPS and inflammation studies by NWZ, SNW, EKM, JEV,  
556 STG; protease activity and structural studies by KH, NWZ, DBL, DC, WP, IEW, BEC, PDM,  
557 CJJ, BTP, AMB, STG, CCG. C243Y mouse strain production and analysis by NWZ, RB,  
558 DZ, SNW, DC, JW, STG. A20 phosphorylation and NF- $\kappa$ B luciferase analysis by NWZ, DC,  
559 DWA, WP, IEW, CCG, STG.

560

561 **Competing interests:** Authors declare no competing interests.

562

563 **Data and materials availability:** All data is available in the main text or the supplementary  
564 materials.

565

566 **Extended Data:**

567 Materials and Methods  
568 Extended Data Figures 1-20  
569 Extended Data Tables 1-5  
570 References (43-78)

571

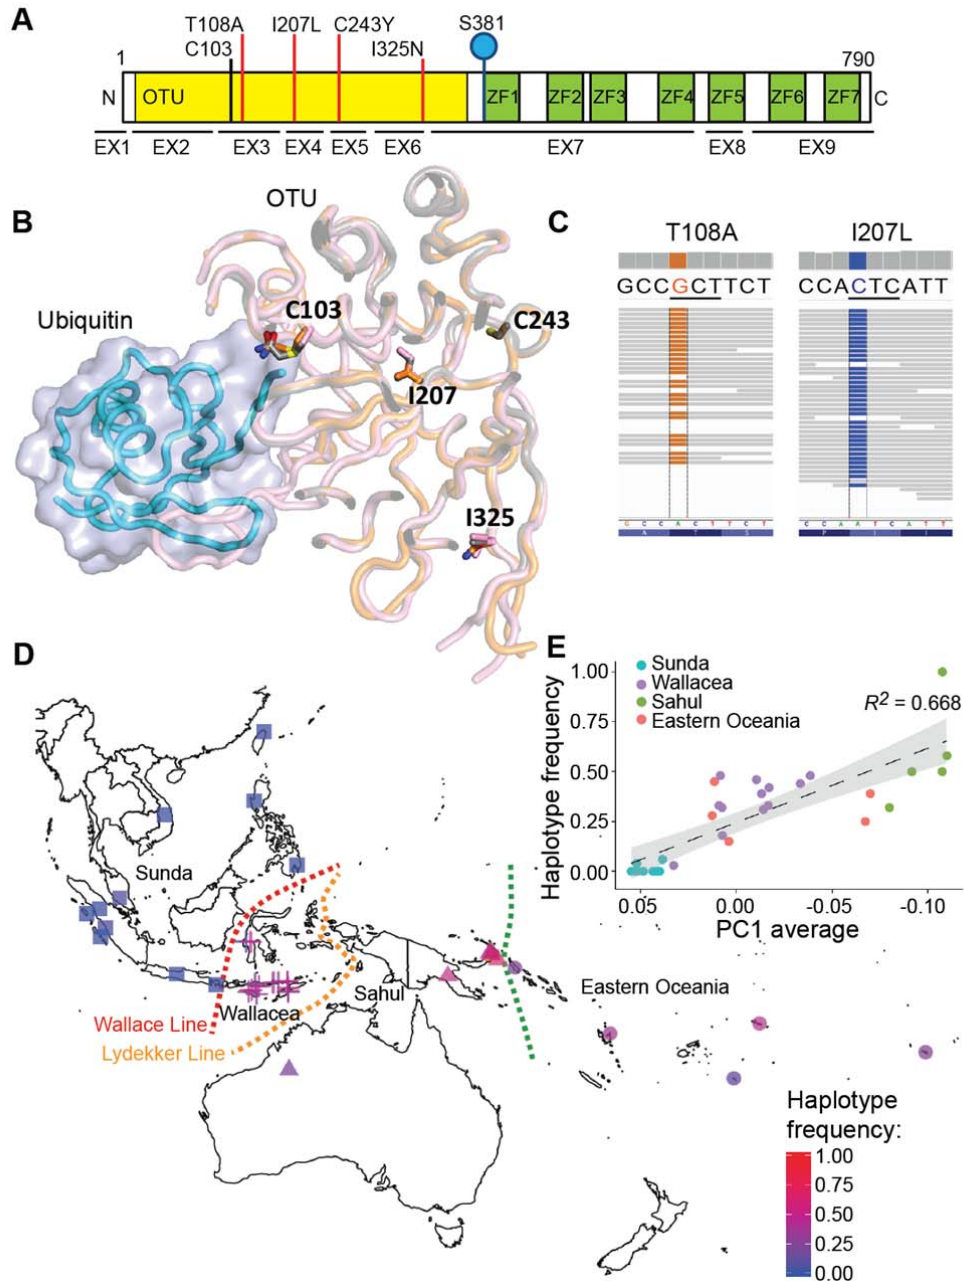

572

573 **Fig. 1. Denisovan, modern human, and mouse variants substituting noncatalytic**  
 574 **residues of the A20 OTU domain. (A)** Schematic of A20 protein encoded by the *TNFAIP3*  
 575 gene (CCDS5187), showing exons (EX1-9), ovarian tumor domain (OTU), zinc fingers (ZF1-  
 576 7), OTU catalytic residue (C103), S381 phosphorylation site, and missense variants studied  
 577 here (red lines). **(B)** Location of variant residues in sliced structure 5LRX<sup>42</sup> of A20 OTU  
 578 domain (pink) complexed with ubiquitin (blue). Structures for WT and I325N OTU domains  
 579 are superposed in grey and orange, respectively. **(C)** Read data of a high-coverage Denisovan  
 580 genome<sup>27</sup> across *TNFAIP3* codons 108 and 207. **(D)** Imputed frequency of the Denisovan  
 581 *TNFAIP3* haplotype in genotype array data from 514 individuals from indigenous  
 582 populations across Island Southeast Asia and Oceania<sup>30</sup>, and directly observed in exome data  
 583 from 72 Martu indigenous Australians<sup>32</sup>. Different shape symbols group populations from

584 Sunda, Wallacea, Sahul and Eastern Oceania. **(E)** Imputed Denisovan *TNFAIP3* haplotype  
585 frequency from populations described in (D) (filled circles) versus a surrogate estimate of  
586 Papuan ancestry (principal component 1, Extended Data Fig. 3). Gray shading indicates 95%  
587 confidence interval of linear regression line.  
588

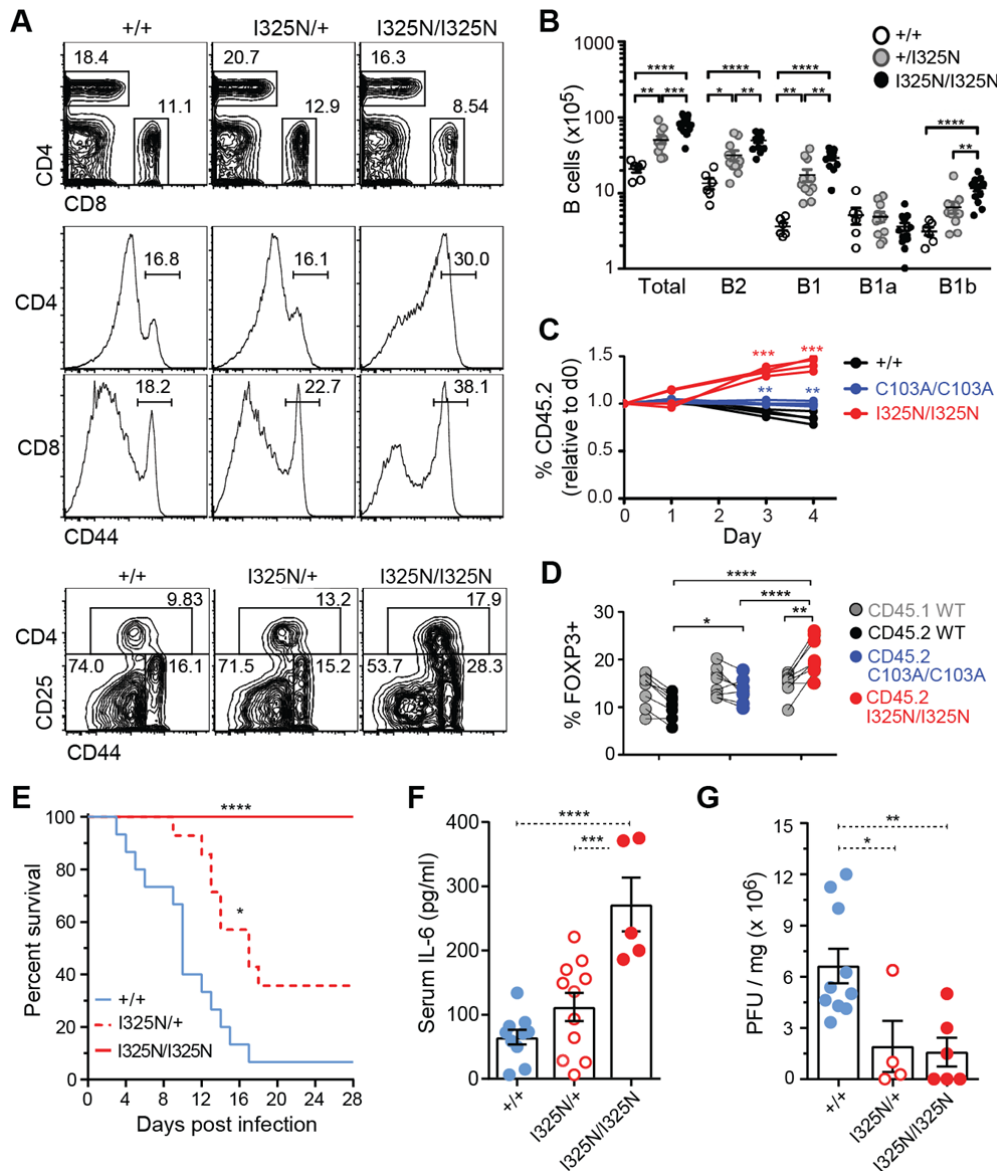

589

590 **Fig. 2. I325N OTU variant confers heightened immunity in mice.** (A) Representative flow  
591 cytometric analysis of splenocytes, showing percentage of CD4<sup>+</sup> or CD8<sup>+</sup> T cells, and  
592 percentage CD44<sup>hi</sup> activated/memory cells within these subsets or percentage CD25<sup>+</sup> CD44<sup>int</sup>  
593 regulatory T- cells or CD25<sup>-</sup> CD44<sup>high</sup> effector/memory T cells among CD4<sup>+</sup> cells. (B)  
594 Numbers of indicated B cells in peritoneum of individual *Tnfaip3* mice (circles). (C, D)  
595 Wild-type CD45.1<sup>+</sup> mice transplanted with equal mixtures of congenic bone marrow from  
596 *Tnfaip3*<sup>+/+</sup> CD45.1<sup>+</sup> donors and CD45.2<sup>+</sup> donors of *Tnfaip3*<sup>I325N/I325N</sup>, *Tnfaip3*<sup>C103A/C103A</sup> or  
597 *Tnfaip3*<sup>+/+</sup> genotypes. (C) Splenocytes from chimeras cultured with 0.1 μg/ml LPS for 0-4  
598 days, and the frequency of CD45.2<sup>+</sup> cells of the indicated *Tnfaip3* genotypes was measured  
599 among B cells from individual chimeras (lines), expressed relative to their frequency on day  
600 0. (D) Pairwise comparison of frequency of FOXP3<sup>+</sup> cells amongst CD45.2<sup>+</sup> and CD45.1<sup>+</sup>  
601 CD4<sup>+</sup> splenocytes from the same chimera. (E-G) Female *Tnfaip3*<sup>+/+</sup> (n=15), *Tnfaip3*<sup>I325N/+</sup>  
602 (n=14) or *Tnfaip3*<sup>I325N/I325N</sup> (n=10) C57BL/6 mice were injected with Coxsackie B4 virus  
603 strain E2 on day 0. (E) Kaplan-Meier survival data (Log-rank test). (F) Plasma IL-6 and (G)  
604 virus titers (plaque forming units, PFU) per mg of pancreas on day 3. Error bars represent



605 SEM and one-way ANOVA used for significance analysis unless otherwise stated,  $*P < 0.05$ ;  
606  $**P < 0.01$ ;  $***P < 0.001$ ;  $****P < 0.0001$ .

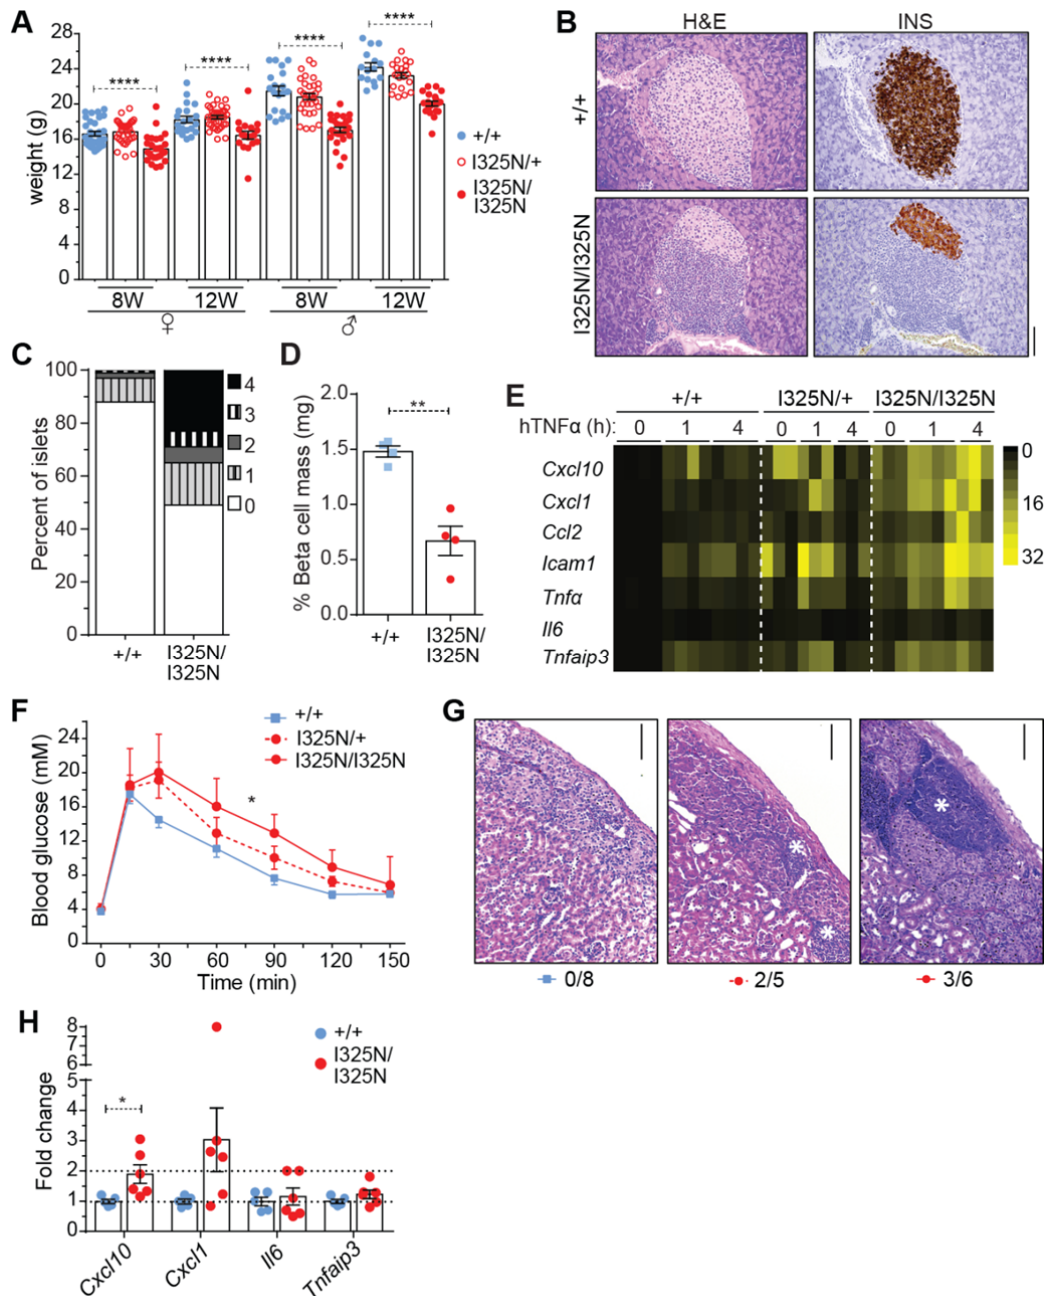

607

608 **Fig. 3. Subclinical inflammatory and metabolic consequences of the I325N variant.** (A)  
 609 Body weights of *Tnfaip3*<sup>+/+</sup>, *Tnfaip3*<sup>I325N/+</sup>, *Tnfaip3*<sup>I325N/I325N</sup> mice of the indicated age and  
 610 sex. Statistical analysis by unpaired one-way ANOVA: \*\*\*\**P* < 0.0001. (B) Hematoxylin  
 611 and eosin (H&E) and insulin (INS) stained pancreas sections (scale = 100  $\mu$ m) with (C)  
 612 cumulative insulinitis scores (4 represents >75% islet mononuclear cell infiltration, and 0 an  
 613 absence of infiltrating cells) and (D) calculated beta cell mass for *Tnfaip3*<sup>+/+</sup> and  
 614 *Tnfaip3*<sup>I325N/I325N</sup> mice. (E) Expression of TNF $\alpha$ -induced genes in islets from *Tnfaip3*<sup>+/+</sup>,  
 615 *Tnfaip3*<sup>I325N/+</sup>, *Tnfaip3*<sup>I325N/I325N</sup> mice. Data represents 3 independent islet preparations with 3-  
 616 4 biological replicates. (F) Glucose tolerance test in diabetic wild-type mice transplanted with  
 617 *Tnfaip3*<sup>+/+</sup>, *Tnfaip3*<sup>I325N/+</sup> or *Tnfaip3*<sup>I325N/I325N</sup> islets, N>8 mice per group. (G) H&E sections of  
 618 islet grafts at post-operative day 30 (scale = 50  $\mu$ m) with the fraction of grafts exhibiting  
 619 immune infiltrate shown below. (H) Islet grafts isolated on post-operative day 10 were

620 analysed for indicated mRNAs by RT-qPCR. *P* values represent Student's *t*-test unless  
621 otherwise stated, \**P* < 0.05; \*\**P* < 0.01; \*\*\*\**P* < 0.0001.

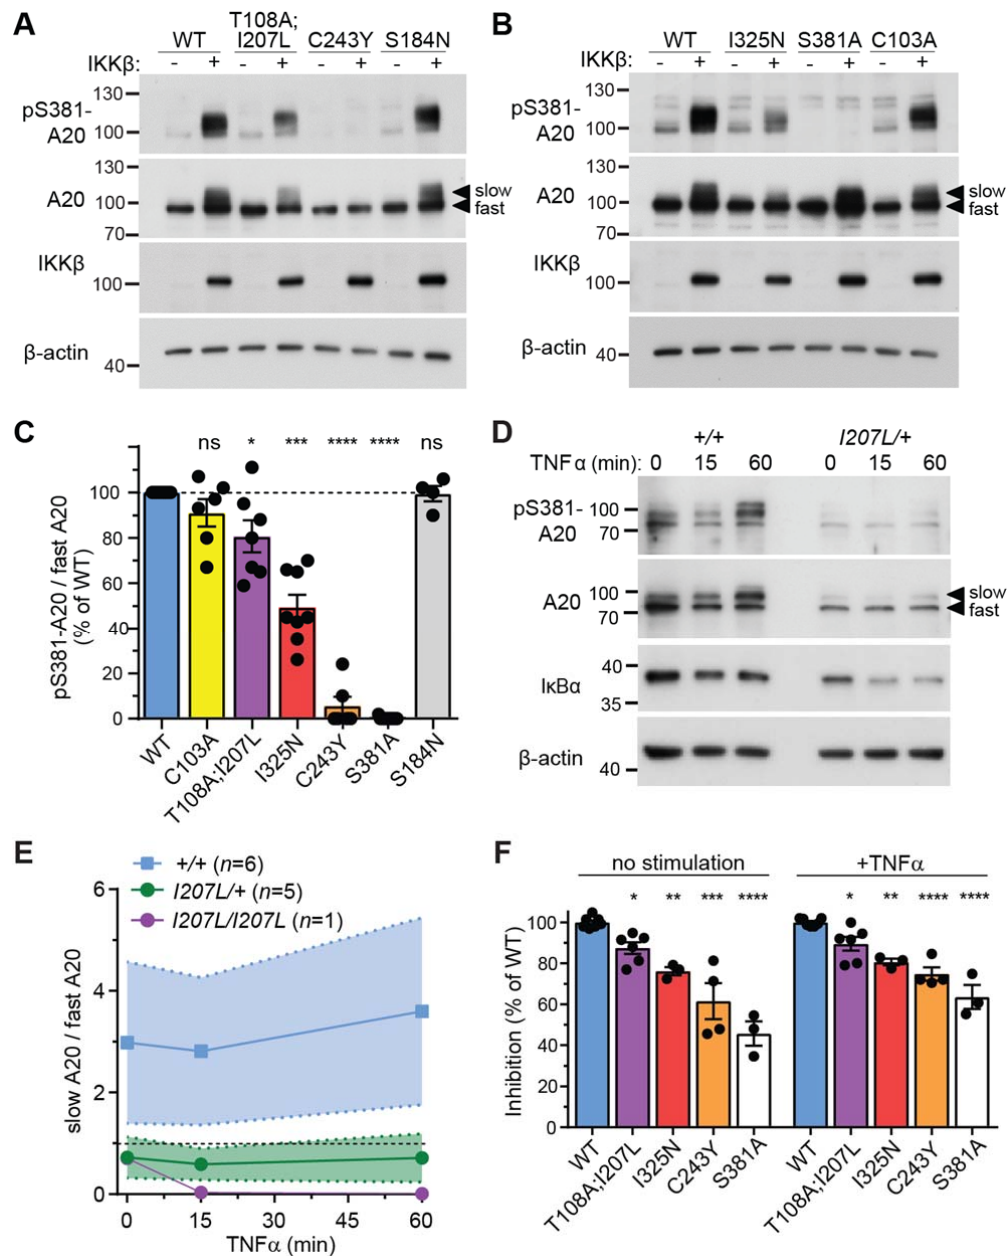

622

623 **Fig. 4. OTU domain variants decrease A20 phosphorylation and NF-κB inhibition.** (A-  
624 C) Representative western blot of lysates from βTC3 mouse insulinoma cells transfected with  
625 vectors encoding wild-type (WT) A20 or the indicated A20 mutants, with or without co-  
626 transfected IKKβ, and probed with antibodies to phospho-Ser381 A20, total A20, IKKβ and  
627 β-actin. Molecular weight markers (kD) and slow- or fast-migrating A20 species are  
628 indicated. (C) Densitometric analysis from multiple independent experiments (dots) showing  
629 the ratio of pSer381-A20 to total fast migrating A20 in IKKβ-cotransfected cells, expressed  
630 relative to the ratio in cells with WT A20. (D) Representative western blot, probed with  
631 antibodies to the indicated proteins, of lysates from peripheral blood mononuclear cells from  
632 healthy donors with wild-type A20 or heterozygous for the Denisovan T108A;I207L  
633 haplotype, stimulated with TNFα for the indicated times. (E) Densitometric ratio of slow- to  
634 fast-migrating A20 species, showing mean and standard deviation from six normal donors,  
635 five T108A;I207L heterozygotes, and one T108A;I207L homozygote (Extended Data Fig.

636 14). **(F)** Inhibition of an NF- $\kappa$ B luciferase reporter in  $\beta$ TC3 cells by co-transfection of WT  
637 A20 or the indicated A20 mutants, expressed relative to wild-type A20 (Extended Data Fig.  
638 13). Statistical analysis in C and F by one-way ANOVA: ns,  $P > 0.05$ ; \* $P < 0.05$ ; \*\* $P < 0.01$ ;  
639 \*\*\* $P < 0.001$ ; \*\*\*\* $P < 0.0001$ .

640

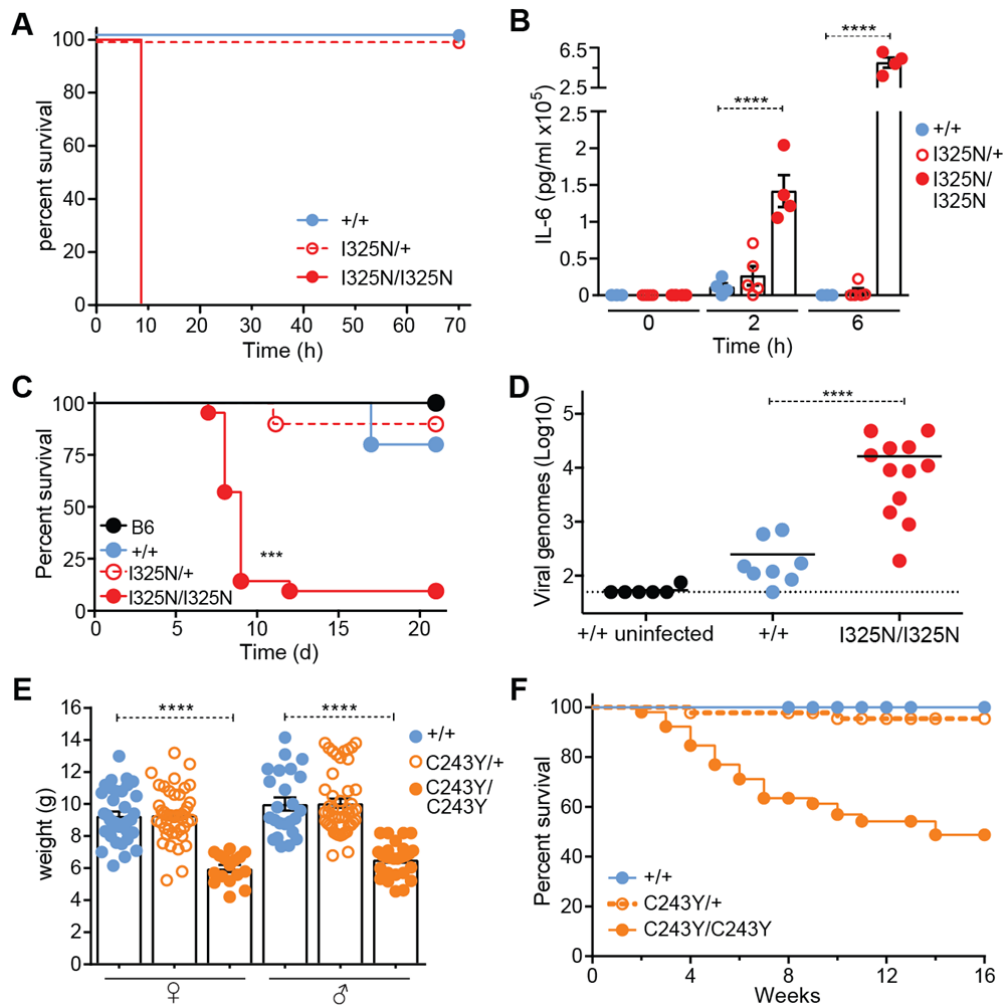

641

642 **Fig. 5. Shift from beneficial to detrimental effects in response to environmental or**  
 643 **genetic stressors.** Kaplan-Meier survival curves (A) and serum IL-6 concentration (B) in  
 644 mice of the indicated genotypes given 50  $\mu$ g LPS by intraperitoneal injection at time=0.  
 645  $N=16-18$  for each curve in (A). (C) Kaplan-Meier survival curves for sex-matched littermates  
 646 of the indicated *Tnfaip3* genotypes and wild-type controls (B6) infected with Ectromelia  
 647 virus. (D) Day 8 serum viral load assessed from mice in (C). (E) Weight of 3-week-old  
 648 *Tnfaip3*<sup>C243Y/C243Y</sup> mice and heterozygous or wild-type littermates. (F) Survival of C243Y  
 649 homozygous mice ( $n=52$ ) compared to heterozygous ( $n=43$ ) or wild-type littermates ( $n=41$ ).  
 650 Statistical analysis by Student's *t*-test and one-way ANOVA: \*\*\* $P < 0.001$ , \*\*\*\* $P < 0.0001$ .

## 651 **Materials and Methods**

652

### 653 Human subjects

654 Patients and healthy family members were recruited via the Clinical Immunogenomics  
655 Research Consortium Australia and The Children's Hospital at Westmead, providing written  
656 informed consent under protocols approved by relevant human research ethics boards.

657

### 658 Genome sequencing

659 Parent-proband trio genomes were sequenced on the Illumina HiSeq X platform using  
660 DNA isolated from whole blood. Libraries were generated using either Illumina TruSeq  
661 PCR-free or TrueSeq Nano.

662 Raw reads were aligned to the hs37d5 reference using BWA-MEM v0.7.10-r789  
663 (arXiv:1303.3997 [q-bio.GN]), and sorted and duplicate-marked with Novosort v1.03.01  
664 (Novocraft Technologies). The GATK suite v3.3-0-g37228af<sup>43</sup> was used for local indel  
665 realignment and base quality score recalibration. gVCFs were generated with GATK  
666 HaplotypeCaller, joint-called as trios using GATK GenotypeGVCFs, and variants  
667 recalibrated using GATK Variant Quality Score Recalibrator (VQSR). Finally, VCF files  
668 were annotated with Variant Effect Predictor (VEP) v76<sup>44</sup> using the LoFTEE<sup>45</sup> and dbNSFP  
669 plugins.

670 Variants were packaged into databases using GEMINI (v0.18.3)<sup>46</sup> and imported into  
671 Seave<sup>47</sup>. All reported variants were manually inspected using IGV<sup>48</sup> to verify their  
672 authenticity and validated by Sanger Sequencing.

673

### 674 Population genetic analysis

675 *TNFAIP3* genotypes were extracted from 279 publicly-available genomes from the  
676 Simons Genome Diversity Project samples<sup>22</sup>, or exome data from 72 Martu indigenous  
677 Australians<sup>32</sup>. In addition, a collection of 514 individuals from across mainland and Island  
678 Southeast Asia, Papua New Guinea and Oceania was genotyped at 567,096 variants using the  
679 Affymetrix Axiom Genome-Wide Human Array, with 538,139 autosomal variants with <5%  
680 missing data kept for further analyses<sup>30</sup>. Weir and Cockerham's estimated  $F_{ST}$  values were  
681 calculated using VCFtools v0.1.14, and principal component analysis was performed using  
682 PLINK v1.9. Genotypes were phased and imputed using the Michigan Imputation Server  
683 v1.0.3 (<http://imputationserver.sph.umich.edu>), and compared to high-coverage Denisovan<sup>27</sup>  
684 and Altai Neanderthal<sup>28</sup> *TNFAIP3* haplotypes. Phred-scaled CADD scores<sup>49</sup> were calculated  
685 for all PASS variants across the extended Denisovan haplotype with gnomAD allele  
686 frequency <0.01.

687

### 688 PBMC isolation and manipulation

689 Human PBMCs were prepared using a Ficoll- Hypaque gradient and live count taken  
690 using 0.1 % trypan blue. Cells were resuspended at  $10^6$  cells/ml in sterile freezing medium  
691 (RPMI-1640, 10% DMSO, 50% FCS) in 1.5 ml Sarstedt cryovials and stored in liquid  
692 nitrogen. Human PBMCs were thawed in a 37°C water bath and added drop wise to pre-  
693 warmed medium (RPMI-1640, 10% FCS, 100 U/ml P/S, 1% HEPES, 2 mM L-Glutamine,  
694 2mM EDTA) and resuspended for culture at 37°C + 5% CO<sub>2</sub> for 1 h prior to stimulation with  
695 recombinant human TNF $\alpha$  (R&D Systems). Following stimulation, cells were pelleted and  
696 processed for immunoblotting or RT-qPCR, as described below.

697

### 698 Mice

699 The *Tnfaip3* Lasvegas strain (*Tnfaip3*<sup>I325N</sup>) were generated by *N*-ethyl-*N*-nitrosourea  
700 (ENU) mutagenesis of C57BL/6 mice, and propagated by backcrossing to C57BL/6. The

701 strain was maintained as heterozygous breeding pairs so that WT littermates could be used  
702 for controls. To generate *Tnfaip3*<sup>C243Y</sup> mice, a guide RNA with the sequence 5'-  
703 GGGATATCTGTAACACTCC-3' was microinjected into C57BL/6 zygotes in combination  
704 with Cas9 mRNA. Founder mice carrying the C243Y substitution were then crossed to  
705 C57BL/6, and heterozygous offspring intercrossed to generate homozygous, heterozygous  
706 and wild-type littermates for experimentation. Mouse lines were housed at the Australian  
707 Phenomics Facility (Australian National University, Canberra, Australia), or at the Australian  
708 BioResources Centre (ABR) (Moss Vale, NSW, Australia). *Tnfaip3*<sup>C103A</sup><sup>18</sup>, 3A9 TCR  
709 transgenic<sup>50</sup> and insHEL transgenic<sup>51</sup> mice have been described. Mice were genotyped for  
710 transgenes and mutations by PCR and used 7–28 (typically 10-16) weeks after birth. For  
711 TCR<sup>3A9</sup> transgenic mouse experiments, mice were hemizygous for the 3A9 or insHEL  
712 transgenes on the B10.BR and the B10.BR.SJL-*Ptprc*<sup>a</sup> (CD45.1) backgrounds, and the  
713 *Tnfaip3*<sup>I325N</sup> mutation was backcrossed to B10.BR. To make chimeras, congenic B6.SJL-  
714 *Ptprc*<sup>a</sup> or B10.BR.SJL-*Ptprc*<sup>a</sup> (CD45.1) mice were irradiated with two doses of 4.5 Gy 4 hrs  
715 apart, and injected IV with mixtures of 1.8x10<sup>6</sup> bone marrow cells from B6 or B10.BR SJL-  
716 *Ptprc*<sup>a</sup> mice and 1.8x10<sup>6</sup> bone marrow cells from B6 (CD45.2) mutant or control mice, and  
717 analyzed 8-14 weeks later. Animal studies were approved by the Garvan/St Vincent's or the  
718 Australian National University Animal Ethics Committees. All procedures performed  
719 complied with the Australian code of Practice for Care and Use of Animals for Scientific  
720 Purposes.

721

#### 722 Coxsackievirus infection model and virus quantification

723 Mice were intraperitoneally injected with normal saline (control) or 20 plaque forming  
724 units (PFU) in 200 µl saline of the CVB4 E2 lab strain kindly provided by Prof. Malin  
725 Flodström Tullberg (Karolinska Institutet, Solna, Sweden) grown in HeLa cells. Mice were  
726 monitored daily and euthanized if they displayed gross signs of illness (e.g., ruffling,  
727 hunching). The pancreas was harvested at indicated times for RT-qPCR and histopathology  
728 analysis and viral titre determination. Serum was also collected by cardiac puncture for  
729 measurement of IL-6 by ELISA (BD; OptEIA™ Set Mouse IL-6), as per manufacturer's  
730 instructions. Non-fasting blood glucose levels were measured at least twice-weekly using  
731 Freestyle Lite Blood Glucose Test Strips (Abbott, Australia). Plaque assays were performed  
732 to determine viral titres within the pancreas following infection. HeLa cells (0.6 x 10<sup>6</sup>/well)  
733 were seeded in 2 ml complete medium (RPMI with 10% FCS, 2mM L-Glutamine, 100 U/ml  
734 Penicillin, 100 µg/ml Streptomycin and 100 µg/ml Normocon) in 6 well plates and incubated  
735 over night at 37°C. Infection samples were collected in RPMI, homogenized in a Dounce  
736 tissue grinder and passed through a 22 µm filter, before preparing tenfold serial dilutions.  
737 HeLa cells, at 90% confluency, were washed with 1X PBS and 400 µl of infectious  
738 homogenate added to each well and incubated for 60 min at 37°C under gentle rocking.  
739 Infectious media was removed and 3 ml of agar mix (2x 1.8% agar, 2x MEM containing 10%  
740 FCS) was added to each well before incubating at 37°C for 3 days. Cells were then fixed with  
741 Carnoy's reagent for 60 min and subsequently stained with 0.5% Crystal violet for 60 s. Wells  
742 were extensively washed with H<sub>2</sub>O and plaques counted.

743

#### 744 Ectromelia virus model

745 Mice were inoculated subcutaneously with 10<sup>3</sup> PFU Ectromelia virus (Moscow strain;  
746 ATCC #VR-1374) in the flank of the left hind limb between the regio tarsi and regio pedis  
747 under avertin anesthesia. Clinical scores were recorded daily, and animals weighed on days 0,  
748 5 and every 2 days thereafter until day 21, and bled on days -1 and 8 to measure viral load.  
749 Animals with a significant clinical score or 25% decrease of starting weight were euthanized  
750 and considered dead the following day. Viral load was measured in blood by qPCR for



751 *ECTV-Mos-156* viral genomes and in organs by viral plaque assay as log<sub>10</sub> PFU/gram  
752 tissue<sup>52</sup>.

753

#### 754 Macrophage cultures

755 Bone marrow from femurs and tibiae was cultured 7 days in complete RPMI1640  
756 medium with 10% fetal bovine serum, 100U/ml penicillin, 100µg/ml streptomycin, 2mM L-  
757 glutamine (Life Technologies) and 50ng/ml recombinant human Macrophage colony-  
758 stimulating factor (Peprotech). Cells were placed into 6-well plates for stimulation with  
759 10ng/ml Salmonella Minnesota R595 (Re) ultra-pure LPS (List Biological) for different time-  
760 points. RNA was extracted by TRIzol (Life Technologies), reverse transcribed to cDNA with  
761 SuperScriptII (Life Technologies), *Cxcl1* and *Cxcl3* levels were measured using the Taqman  
762 assay (Applied Biosystems). RNA levels relative to *Efla* were calculated with the delta Ct  
763 values. Conditionally *Hoxb8*-immortalized bone-marrow progenitor cells were generated as  
764 described<sup>53</sup>.

765

#### 766 LPS sepsis model

767 A low dose of 50µg LPS was administered by intraperitoneal injection. Mice were  
768 monitored every 1 h for 10 h and sacrificed if ethical end-point reached. Monitoring was  
769 conducted using body conditioning score and Grimace Scale (NC3Rs [National Centre for the  
770 Replacement Refinement & Reduction of Animals in Research) approved by the Garvan/St  
771 Vincent's Animal Ethics Committee. Monitoring continued twice daily for 7 days in  
772 surviving mice, were weights and blood glucose levels were also measured. Serum was  
773 collected by tail-tipping before LPS injection and 2 and 4 hours following injection for IL6  
774 determination by ELISA (BD; OptEIA™ Set Mouse IL-6), as per manufactures instructions.

775

#### 776 Immunohistochemistry and beta cell area determination

777 Tissues were fixed in 10 % neutral buffered formalin (Sigma-Aldrich), paraffin  
778 embedded and parallel sections (5 µm) prepared. Sections were stained with hematoxylin and  
779 eosin (H&E; Sigma-Aldrich) and for pancreatic tissue parallel sections stained for insulin  
780 (purified rabbit anti-mouse insulin polyclonal antibody; 4590; Cell Signaling Technology).  
781 Visualization of bound anti-insulin antibody was achieved using HRP-labelled polymer-  
782 conjugated goat anti-rabbit IgG (Dako EnVision+ System), followed by counterstain with  
783 hematoxylin. For pancreatic beta cell mass determination consecutive pancreatic serial  
784 sections at 200 µm intervals were stained for insulin and beta cell area quantified from total  
785 area taken by insulin positive cells compared to non-positive tissue (ImageJ). Beta cell mass  
786 (mg) was calculated by multiplying relative insulin-positive area by the mass of the isolated  
787 pancreas before fixation. Images were captured using a Leica DM 4000 or Leica DM 6000  
788 Power Mosaic microscope (Leica Microsystems).

789

#### 790 Metabolic studies

791 Blood glucose levels (BGL) were determined using a FreeStyle Lite® glucometer and  
792 blood glucose test strips (Abbott Diabetes Care) via tail tipping. Measurements were taken  
793 from 8 and 12 week old male or female non-fasted mice. Intraperitoneal glucose tolerance  
794 tests (IP-GTT) were conducted following an overnight fast (16 h) with access to water. The  
795 following day mice were weighed and fasting blood glucose measurements taken.  
796 Subsequently, mice were injected (IP) with 20% dextrose w/v (Sigma Aldrich) to a final  
797 concentration of 2 g glucose per kg body weight (2g/kg). Blood glucose levels were  
798 measured from the tail vein at 15, 30, 60 and 120 min post-glucose administration.  
799 Intravenous (IV) GTT was conducted in a similar manner; however, glucose (1 g/kg) was  
800 administered intravenously into the tail vein and blood glucose measurements taken at 0, 5,

801 10, 15, 20, 30, and 60 min post-injection. During the IV-GTT blood samples were also taken  
802 for the determination of insulin content via ELISA, conducted as per manufactures  
803 instructions (Cayman Chemical). Glucose-stimulated insulin secretion assay (GSIS) was  
804 performed for islets *ex vivo* as described<sup>54</sup>.

805

#### 806 Islet isolation, transplantation, and *in vitro* studies

807 Islets were isolated as previously described<sup>55</sup>, and counted for islet transplantation or *in*  
808 *vitro* experiments using a Leica MZ9.5 stereomicroscope. Islets were transplanted under the  
809 kidney capsule of diabetic B6 littermates as described<sup>56</sup>. Diabetes was induced by IP  
810 injection of 180 mg/kg streptozotocin (Sigma-Aldrich) dissolved in 0.1 M citrate buffer (pH  
811 4.2) at a concentration of 20 mg/ml. Diabetes was determined as [blood glucose]  $\geq$ 16 mM on  
812 two consecutive days measured by FreeStyle Lite® glucometer and Abbott Diabetes Care test  
813 strips following tail tipping. Islet grafts were retrieved from recipients at indicated time points  
814 post-transplantation for analysis of islet morphology, function, or degree of lymphocytic  
815 infiltration by histology or gene expression by RT-qPCR. Gene expression in islet grafts was  
816 calculated using the average WT  $\Delta$ Ct value. Islets to be used for *in vitro* studies were cultured  
817 overnight in islet overnight culture media (RPMI-1640, 20% FCS, 100 U/ml P/S, 2 mM L-  
818 Glutamine) at 37°C + 5% CO<sub>2</sub>.

819

#### 820 Flow cytometry

821 Flow cytometric staining was performed as described in<sup>57,58</sup>. Antibodies against the  
822 following surface antigens were: CD4 (RM4-5), CD8 (53-6.7), CD21 (7G6), CD23 (B3B4),  
823 CD25 (PC61.5), CD44 (IM7), CD69 (H1.2F3), CD93 (AA4.1), CD45.2 (104), B220 (RA3-  
824 6B2), IgM (II/41), IgD (11-26). Splenocytes were labeled with CFSE (Invitrogen) and  
825 cultured in RPMI1640 supplemented with 10% FCS, 2 mM L-glutamine, 55  $\mu$ M 2-  
826 mercaptoethanol, and penicillin/streptomycin. B cells were stimulated with: F(ab')<sub>2</sub> goat anti-  
827 mouse IgM (10  $\mu$ g/ml, Jackson Immunoresearch Laboratories), LPS from *E. coli* 055:B5  
828 (10, 1, 0.1  $\mu$ g/ml, SIGMA), anti-CD40 (10  $\mu$ g/ml FGK4.5, BioXCell). When analysing 3A9  
829 TCR transgenic cells single cell suspensions from thymus, spleen or pancreatic lymph node  
830 were incubated for 30 min at 4° C in culture supernatant from the 1G12 hybridoma (specific  
831 for TCR<sup>3A9</sup>). Then, cells were pelleted by centrifugation and incubated for 30 min at 4° C in  
832 FACS buffer containing assortments of fluorochrome- or biotin-conjugated monoclonal  
833 antibodies against cell surface proteins. After washing in FACS buffer, cells were fixed and  
834 permeabilised using the eBioscience Foxp3 staining buffers, then incubated with antibodies  
835 specific for intracellular proteins and Brilliant Violet 605-streptavidin conjugate (BioLegend)  
836 to detect biotin-conjugated antibodies. Antibodies were purchased from BD, eBioscience or  
837 BioLegend. Data were acquired with LSR II flow cytometers (BD) and analyzed using  
838 FlowJo software (Tree Star).

839

#### 840 CytoF:

841 Unstimulated spleen cells from four wild-type and four I325N-homozygous mutant mice  
842 were individually labeled with mass-barcodes, mixed, permeabilized and stained with mass-  
843 labeled antibodies to a panel of cell surface markers and intracellular proteins including I $\kappa$ B $\alpha$ ,  
844 and analyzed by CYTOF mass spectrometry<sup>59,60</sup>. Spanning-tree Progression Analysis of  
845 Density-normalized Events (SPADE)<sup>61</sup> analysis was used to resolve leukocyte lineages and  
846 subsets, and the relative intensity of I $\kappa$ B $\alpha$  in each subset compared between mutant and wild-  
847 type cell counterparts.

848

849

850

851 Real Time quantitative PCR (RT-qPCR)

852 Mouse islets were isolated and placed into 12-well non-tissue culture-treated plates (150-  
853 200 islets/well; Fisher Scientific). Following an overnight culture islets were treated with  
854 200 U/ml recombinant human (h) TNF $\alpha$  (R&D Systems) for 1, 4, or 24 h. Total RNA was  
855 extracted using the RNeasy Plus Mini Kit (Qiagen) and reverse transcribed using Quantitect  
856 Reverse Transcription Kit (Qiagen). Primers were designed using Primer3 software<sup>62</sup> with  
857 sequences obtained from GenBank and synthesized by Sigma Aldrich (Table 3, 4). PCR  
858 reactions were performed on the LightCycler<sup>®</sup> 480 Real Time PCR System (Roche) using the  
859 FastStart SYBR Green Master Mix (Roche). Cyclophilin (CPH) was used as the  
860 housekeeping gene and data analyzed using the 2 <sup>$\Delta\Delta$ CT</sup> method. Initial denaturation was  
861 performed at 95° C for 10 sec, followed by a three-step cycle consisting of 95° C for 15 sec  
862 (4.8° C/s, denaturation), 63° C for 30 sec (2.5° C/sec, annealing), and 72° C for 30 sec (4.8°  
863 C/s, elongation). A melt-curve was performed after finalization of 45 cycles at 95° C for 2  
864 min, 40° C for 3 min and gradual increase to 95° C with 25 acquisitions/° C. Expression  
865 differences were visualized using GraphPad or BAR Heatmapper plus tool.

866

867 Immunoblot analysis and immunoprecipitation

868 Primary islets were lysed in islet lysis buffer (50 mM Tris-HCL pH7.5, 1% Triton X,  
869 0.27 M sucrose, 1 mM EDTA, 0.1 mM EGTA, 1 mM Na<sub>3</sub>VO<sub>4</sub>, 50 mM NaF, 5 mM  
870 Na<sub>4</sub>P<sub>2</sub>O<sub>7</sub>, 0.1%  $\beta$ -mercaptoethanol; supplemented with EDTA-free protease inhibitor  
871 [Roche]),  $\beta$ TC<sub>3</sub> cells were lysed with radioimmunoprecipitation (RIPA) buffer with SDS,  
872 following relevant treatment with or without 200 U/ml of recombinant human (h) or mouse  
873 (m) TNF $\alpha$  (R&D Systems). Protein concentration was measured using the Bradford assay  
874 (Bio-Rad) and total protein (20-25  $\mu$ g) resolved on a 7 - 10% SDS PAGE gel and then  
875 transferred to a nitrocellulose membrane, Immobilon-P<sup>®</sup> (Merck Millipore). Membranes  
876 were incubated with anti-I $\kappa$ B $\alpha$  (9242), anti-phospho-I $\kappa$ B $\alpha$  (9256), anti-JNK (9252), anti-  
877 phospho-JNK (9255), anti-I $\kappa$ K $\alpha$  (2682), anti-phospho-I $\kappa$ K $\alpha$ / $\beta$  (16A6; 2697), anti-NIK  
878 (4994), anti-NF- $\kappa$ B2 p100/p52 (4882), anti-RelB (C1E4, 4922) (Cell Signaling Technology);  
879 anti-beta-actin (AC15) (Sigma-Aldrich); or anti-S381-A20 (a kind gift by Professor Derek W.  
880 Abbott<sup>19</sup>) followed by horseradish peroxidase (HRP)-labeled secondary antibody goat-anti-  
881 mouse IgG Fc (Pierce Antibodies) or donkey-anti-rabbit IgG (GE Life Sciences). HRP  
882 conjugates bound to antigen were detected and visualized by using an ECL detection kit (GE  
883 Life Sciences).

884 Immunoprecipitation was conducted in thymocytes, which were lysed at 4° C in  
885 immunoprecipitation buffer (0.025M Tris, 0.15M NaCl, 0.001M EDTA, 1% NP-40, 1%  
886 Triton X 100, 5% glycerol) containing Complete<sup>®</sup> protease inhibitor and Phosphostop<sup>®</sup>  
887 phosphatase inhibitors (Roche). Immunoprecipitation was then conducted by first preclearing  
888 lysates with protein A/G-Sepharose (Thermo Fisher Scientific) for 1 h and then incubated with  
889 anti-TNFR1 (ab7365) cross-linked beads or anti-A20 (59A426) antibody (Abcam) for 2 h at  
890 4° C. Following incubation with only antibody 25  $\mu$ l of protein A/G beads were added and  
891 incubated at 4° C on a roller overnight. Beads were washed 4 X with lysis buffer and then  
892 eluted using low pH amide buffer for cross-linked beads or 30  $\mu$ l of Laemmli reducing gel-  
893 loading sample buffer for non-cross linked beads. Samples were vortexed, heated to 100° C  
894 for 5 min, cooled on ice for 10 min, and then loaded onto a 8 or 10% agarose gel for  
895 immunoblotting for anti-A20 (56305/D13H3), anti-I $\kappa$ B $\alpha$  (9242), anti-I $\kappa$ K $\beta$  (2684), anti-JNK  
896 (9252), anti-TAK1 (52065), anti-phospho-I $\kappa$ B $\alpha$  (9256), anti-phospho-JNK (9255), anti-  
897 phospho-TAK1 (4536/90C7), anti-TNFR1 (3736C25C1) (Cell Signaling Technology), anti-  
898 RIP1 (H-207) (Santa Cruz), anti-RIP1 (610458) (BD bioscience), anti-TAK1 (491840) (R&D  
899 systems), or anti-beta-actin (AC15) (Sigma-Aldrich). For B cell stimulation, splenic B cells  
900 purified by MACS with CD43 depletion were stimulated with anti-IgM F(ab')<sub>2</sub> or LPS for

901 the indicated times. Cells were lysed with TNE buffer (1% Nonidet P-40, 20 mM Tris-HCl,  
902 pH 8.0, 150 mM NaCl, 0.1 mM sodium orthovanadate, and complete protease inhibitor  
903 [Roche]). The following antibodies were used: anti-I $\kappa$ B $\alpha$  (9242), anti-TNFAIP3  
904 (5630/D13H3) (Cell Signaling Technology), anti-A20 (A-12), anti-ubiquitin (P4D1) (Santa  
905 Cruz) and anti-beta-actin (AC-15) (Sigma-Aldrich).

906

#### 907 In vitro reporter transfection studies

908 Reporter assays were carried out as described previously<sup>63,64</sup>. NF- $\kappa$ B activity  
909 experiments were conducted using  $\beta$ TC<sub>3</sub> cells transfected with 0.3  $\mu$ g of the NF- $\kappa$ B.Luc  
910 reporter (Promega) and 0.25  $\mu$ g CMV. $\beta$ -galactosidase (a kind gift from Beth Israel Harvard  
911 Medical School, Boston, MA). pcDNA vectors encoding human WT or variant A20  
912 constructs or the empty pcDNA3.1 reporter were then added (0.3  $\mu$ g), and each well topped  
913 with 0.15 pcDNA3.1 to make 1  $\mu$ g total DNA. Transfection was conducted using  
914 Lipofectamine 2000 (Invitrogen). Following transfection cells were stimulated with 200 U/ml  
915 of recombinant human (h) TNF $\alpha$  (R&D Systems). Luciferase activity was assayed in cell  
916 lysates harvested 8 h post-stimulation, using a luciferase assay kit (Promega). Results were  
917 normalized to  $\beta$ -galactosidase activity (Galactostar) to give relative luciferase activity.  
918 Expression plasmids and reporters were obtained and maintained as described previously<sup>63,64</sup>.

919

#### 920 Ubiquitination assays

921 Wildtype A20, A20<sup>I325N</sup> or A20<sup>C103A</sup> OTU domain protein (1  $\mu$ g) purified from *E. coli*  
922 was added to 2  $\mu$ g of K48-ubiquitin chains of mixed chain length (Ub<sub>2</sub>-Ub<sub>7</sub>) or to purified  
923 tetra-ubiquitin (Ub<sub>4</sub>) (#UC-230, UC-210, Boston Biochem). A20 OTU domains added to  
924 mixed-length K48-ubiquitin chains were incubated in 100  $\mu$ l of deubiquitin buffer (50 mM  
925 HEPES pH 8.0, 0.01% Brij-35, 3mM DTT) at 37° C with agitation at 400 rpm for 60 or 150  
926 min in a benchtop incubator shaker. A20 OTU domains added to K48-tetra-ubiquitin chains  
927 were incubated in 100  $\mu$ l of deubiquitin buffer (25 mM HEPES pH 8.0, 5 mM DTT, 5 mM  
928 MgCl<sub>2</sub>). At the indicated times, 20  $\mu$ l of reaction mixture was collected and the enzymatic  
929 reaction stopped by addition of SDS sample buffer. Recombinant Flag-tagged full length  
930 A20<sup>+/+</sup> or A20<sup>I325N</sup>, was expressed in HEK-293T cells and purified as described  
931 previously<sup>14,17</sup>. Full-length A20 deubiquitination reactions were performed using 100ng  
932 recombinant A20, 500 ng of the indicated ubiquitin chain and DUB reaction buffer with or  
933 without phosphatase inhibitor cocktail and were incubated for the indicated times at 37° C  
934 with agitation at 1,000 rpm. Following incubation samples were placed on ice and 20  $\mu$ l  
935 collected and added to SDS sample buffer to stop the reaction. Full-length ubiquitin ligase  
936 assay was performed as previously described<sup>14</sup>. Samples were subjected to 1D SDS-PAGE  
937 and immunoblotted for ubiquitin (clone P4D1; Santa Cruz or Cell Signaling Technology) or  
938 A20 (clone 59A426; Abcam or A-12; Santa Cruz), as described above.

939

#### 940 OTU protein preparation and crystallisation

941 The N-terminal OTU domains of human and mouse A20 (human WT and I325N,  
942 residues 1-366; mouse WT and C103A, 1-360) were cloned into vector pGEX-6P-1 (GE  
943 Healthcare), facilitating bacterial expression as a GST-fusion. Sequences were confirmed by  
944 Sanger sequencing. Expression was performed in *E. coli* strain BL21 (DE3) Gold, where  
945 cells were induced at an OD600 of 0.5 with 0.2 mM IPTG, followed by incubation at 20° C  
946 overnight in LB medium. Cells were harvested by centrifugation, lysed by three cycles of  
947 freeze-thaw and one cycle of pressure shock (human WT and I325N) or by sonication alone  
948 (mouse WT and C103A). The GST-fusions was captured from the cleared lysate by passage  
949 over GSH-Sepharose CL4B resin (GE). For purification of human WT and I325N, the resin  
950 was washed (50 mM Tris (pH 8.8) 200 mM NaCl, 5 mM DTT, 1 mM EDTA), then the A20

951 component released by overnight incubation (4° C) with PreScission protease. Eluted A20  
952 was stabilized by incubation with iodoacetamide (Sigma; 30 mM, 30 min at RT). The  
953 reaction was terminated by addition of an equivalent amount of  $\beta$ -mercaptoethanol. For  
954 purification of mouse WT and C103A protein, purified GST-OTU fusion protein was eluted  
955 (50 mM Tris-HCl [pH 8.0], 200 mM NaCl, 5 mM DTT, 10 mM glutathione) from the column  
956 and the A20 OTU component was released by overnight incubation (4° C) with PreScission  
957 protease. The cleavage products were subject to anion-exchange chromatography (HiTrap Q  
958 FF; GE) where the OTU domain eluted as a single peak between 5 and 500 mM NaCl, 25  
959 mM Tris-HCl pH 7.5. All proteins were then concentrated and subject to gel filtration  
960 chromatography (ÄKTA S200 26/60, buffers as described above).

961 Crystals of both the A20<sup>I325N</sup> variant (long triangular rods) and wild-type A20 (long rods)  
962 OTU domains, grown under the same conditions; equal volumes of protein (2.7 mg/mL) and  
963 well solution (50 mM CaCl<sub>2</sub>, 100 mM MES (pH 6.0), 5% PEG1500) were combined in a  
964 hanging drop setup. Crystals grew over several weeks at RT. Partial cryoprotection was  
965 achieved by briefly (1-5 seconds) swimming crystals in a solution comprising equal volumes  
966 of mother liquor and well solution doped with glycerol (25% v/v final) prior to being plunge  
967 vitrified in liquid N<sub>2</sub>. For the mouse wild-type A20, crystallization was achieved by vapor-  
968 diffusion in hanging-drops at a protein concentration of 8 mg/mL in 1.8 - 2.4 M NaCl, 0.1 M  
969 MES [pH 6-6.7]. Crystals were soaked in mother liquor containing 30% ethylene glycol for  
970 one minute and immediately vitrified in a nitrogen cryo-stream.

971

#### 972 Crystallographic data reduction and model refinement

973 Diffraction data using light of wavelength 0.9537 Å was collected at 100 K at beamline  
974 MX2 at the Australian Synchrotron. Data were indexed and integrated with MOSFLM<sup>65</sup>. The  
975 spacegroups were scrutinized with POINTLESS, and the data scaled with AIMLESS<sup>66,67</sup>, or  
976 SCALA<sup>68</sup> accessed via the CCP4i software interface<sup>69</sup>. Although grown under essentially the  
977 same conditions, the human WT and I325N mutant A20 proteins crystallized in different  
978 space groups. These data were highly anisotropic, resulting in poor completeness, low  
979 multiplicity, and noisy electron density maps. In the case of the mouse OTU crystal, there  
980 was significant thermal diffuse scattering. See Table 5 for data reduction and refinement  
981 statistics.

982 Structures were solved by molecular replacement using PHASER<sup>70</sup>. The search model  
983 was the A-chain of PDB entry 3DKB, but stripped of surface loops that displayed  
984 conformational variability in other PDB entries (2VFJ and 3ZJD). In the case of the human  
985 I325N data the structure was originally solved in the space-group P3<sub>1</sub>2 with 4 molecules in  
986 the asymmetric unit. However, crystal packing and residual unaccounted-for electron density  
987 suggested more molecules might be present. The structure was subsequently solved in the  
988 lower symmetry P3<sub>1</sub> space group, with 6 molecules in the asymmetric unit, sensible packing  
989 and no unaccounted-for density. The human wild-type A20 structure, solved as a control for  
990 the iodoacetamide alkylation, also has 6 molecules (three dimers) in a different asymmetric  
991 unit and space group. The mouse OTU structure was indexed and refined in the P3<sub>2</sub> space  
992 group, with a dimer in the asymmetric unit. Restrained B-factor refinement, using local non-  
993 crystallographic symmetry (NCS) restraints, was performed with REFMAC5<sup>71</sup>. For the  
994 mouse A20 OTU structure TLS and restrained refinement was carried out using  
995 phenix.refine<sup>72</sup>. Between rounds of refinement, electron density maps and composite OMIT  
996 maps<sup>73</sup> and their fit to the model were examined using COOT<sup>74</sup>. Amino acid side chains were  
997 added/subtracted if suggested by difference map electron density. The active-site cysteine  
998 (C103) was clearly identified through inspection of mFo-DFc difference maps as the only  
999 cysteine residue alkylated by the iodoacetamide treatment in both human structures (PDB  
1000 residue descriptor YCM). All 6 molecules refined in each structure are highly similar in fold,

1001 both to themselves, and compared with each other. All molecules form dimers with  
1002 neighboring molecules, as observed in other crystal structures. Structure validation was  
1003 performed using the MOLPROBITY web server<sup>75</sup>. The final human I325N, human WT, and  
1004 mouse WT structures contain Ramachandran favored/outlier components of 88.64/0.00%,  
1005 88.13/2.87 %, and 82.13/7.87 %, respectively.

1006

#### 1007 Measurement of OTU domain thermal stability

1008 Purified A20 OTU domains (0.4 mg.mL<sup>-1</sup>) were exchanged into 100 mM NaCl, 5 mM  
1009 dl-dithiothreitol, 20 mM Na<sub>2</sub>HPO<sub>4</sub> (pH 7.5). Circular dichroism data were collected with a  
1010 Chirascan circular dichroism spectrometer (Applied Photophysics, UK) in a 1 mm cuvette.  
1011 The protein was heated from 20° C to 90° C at a rate of 1° C min<sup>-1</sup> while ellipticity was  
1012 monitored at 220 nm. The thermally induced unfolding of A20 OTU domains was not  
1013 reversible. The unfolding of the A20 OTU domains was described by a two-state model<sup>76</sup>  
1014 (**Equation 1**).

1015

#### 1016 **Equation 1**

$$y_{obs} = \frac{y_n + m_n T + (y_u + m_u T) \exp\left(\frac{\Delta H_{vH}}{R} \left(\frac{1}{T} - \frac{1}{T_{trs}}\right)\right)}{1 + \exp\left(\frac{\Delta H_{vH}}{R} \left(\frac{1}{T} - \frac{1}{T_{trs}}\right)\right)}$$

1017

1018 Where  $y_{obs}$  is the observed ellipticity,  $y_n$  and  $y_u$  are the ellipticity values observed for the  
1019 native and unfolded states, respectively. The  $m_n$  and  $m_u$  values are the linear temperature  
1020 dependencies of  $y_n$  and  $y_u$ .  $\Delta H_{vH}$  is the apparent van't Hoff enthalpy, R is the universal gas  
1021 constant, and  $T_{trs}$  is the temperature at which the population of unfolded protein is 50%.  
1022 Curves were fit by non-linear regression using GraphPad Prism v6 (GraphPad Software).

1023

#### 1024 Statistical methods

1025 Results are expressed as mean +/- standard error mean (SEM). Statistical analysis was  
1026 performed using the Student's *t*-test or ANOVA were indicated.

1027 **Supplementary Text**

1028

1029 Extended Figure 3 legend:

1030 **Fig.3. Subclinical inflammatory and metabolic consequences of the I325N variant. (A)**

1031 Body weights of 8 and 12 week old *Tnfaip3*<sup>+/+</sup>, *Tnfaip3*<sup>I325N/+</sup>, *Tnfaip3*<sup>I325N/I325N</sup> male or  
1032 female mice. **(B)** Representative H&E and insulin (INS) stained pancreas sections (note  
1033 pancreatitis; scale = 100 µm) with **(C)** cumulative insulinitis scores (0 = no evidence of  
1034 inflammation; 1 = mononuclear cells present, but not infiltrating islet; 2 = 0-25%  
1035 mononuclear cell infiltration of islet [peri-insulinitis]; 3 = >25% insulinitis; 4 = >75% insulinitis)  
1036 and, **(D)** calculated beta cell mass for *Tnfaip3*<sup>+/+</sup> and *Tnfaip3*<sup>I325N/I325N</sup> mice. **(E)** Heat map  
1037 depicting mRNA levels for islet early-immediate pro-inflammatory factors<sup>77</sup> measured by  
1038 RT-qPCR from islets isolated from individual mice and treated with TNFα for the indicated  
1039 times. Values normalised against 0 h *Tnfaip3*<sup>+/+</sup> islets. Data represents 3 independent islet  
1040 preparations with 3-4 biological replicates. **(F)** Islets isolated of the indicated genotypes were  
1041 transplanted under the kidney capsule of syngeneic diabetic *Tnfaip3*<sup>+/+</sup> recipients. When  
1042 euglycemia was established comparably by mutant or wild-type islets (see Extended Data  
1043 Fig. 12A), a glucose tolerance test was conducted. Following an overnight fast, recipients  
1044 received 2 g/kg glucose (i.p.) and blood glucose monitored over time (min). Mean area under  
1045 the curve was used for statistical comparison to wild-type. **(G)** At post-operative day 30, islet  
1046 grafts were removed and analysed by H&E staining (scale bar = 50 µm) with the fraction of  
1047 islet grafts of each genotype exhibiting immune infiltrate shown below. **(H)** Islet grafts  
1048 isolated on post-operative day 10 were analysed for indicated mRNAs by RT-qPCR. Gene  
1049 expression was calculated using the average wild-type ΔCt value with each data point  
1050 representing an individual graft. P values represent Student's *t*-test unless otherwise stated \**P*  
1051 < 0.05; \*\**P* < 0.01; \*\*\*\**P* < 0.0001.

1052 **Extended Data Figures and Tables**

1053

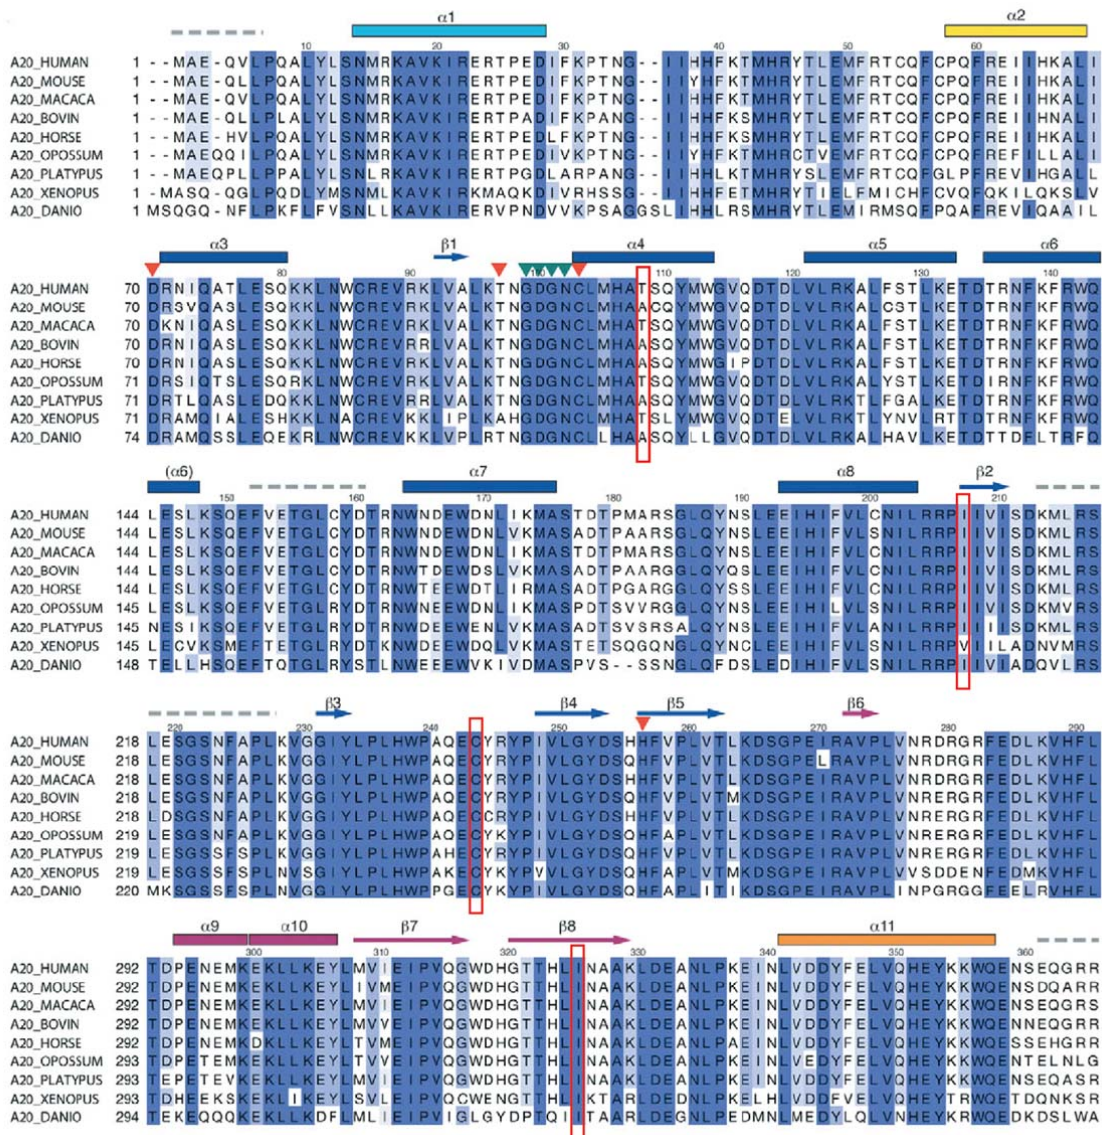



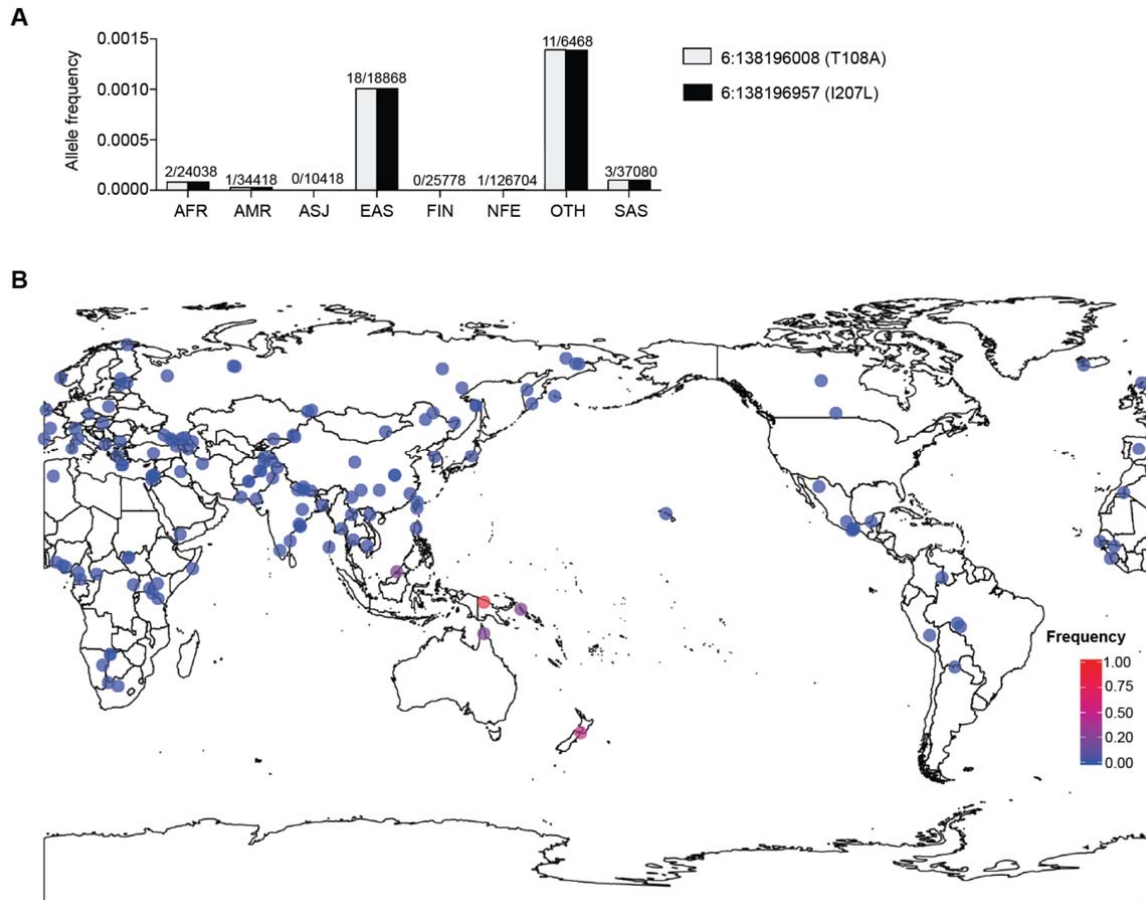

1059

1060 **Extended Data Fig. 2.**

1061 **Global distribution of the T108A;I207L *TNFAIP3* haplotype.** (A) gnomAD r2.0.2  
1062 population allele frequencies for the T108A and I207L missense variants in *TNFAIP3*, with  
1063 allele counts above each bar (total as denominator). Populations are defined by principal  
1064 component clustering of samples with individuals of known ancestry: those which do not  
1065 cluster fall into the OTH group. AFR, African; AMR, Latino; ASJ, Ashkenazi Jew; EAS,  
1066 East Asian; FIN, Finnish European; NFE, non-Finnish European; OTH, other; SAS, South  
1067 Asian. The OTH population includes one homozygote, while all other alleles are  
1068 heterozygous. (B) Frequency of the T108A;I207L *TNFAIP3* haplotype within 279 individual  
1069 genomes from the Simons Genome Diversity Project<sup>22</sup>.

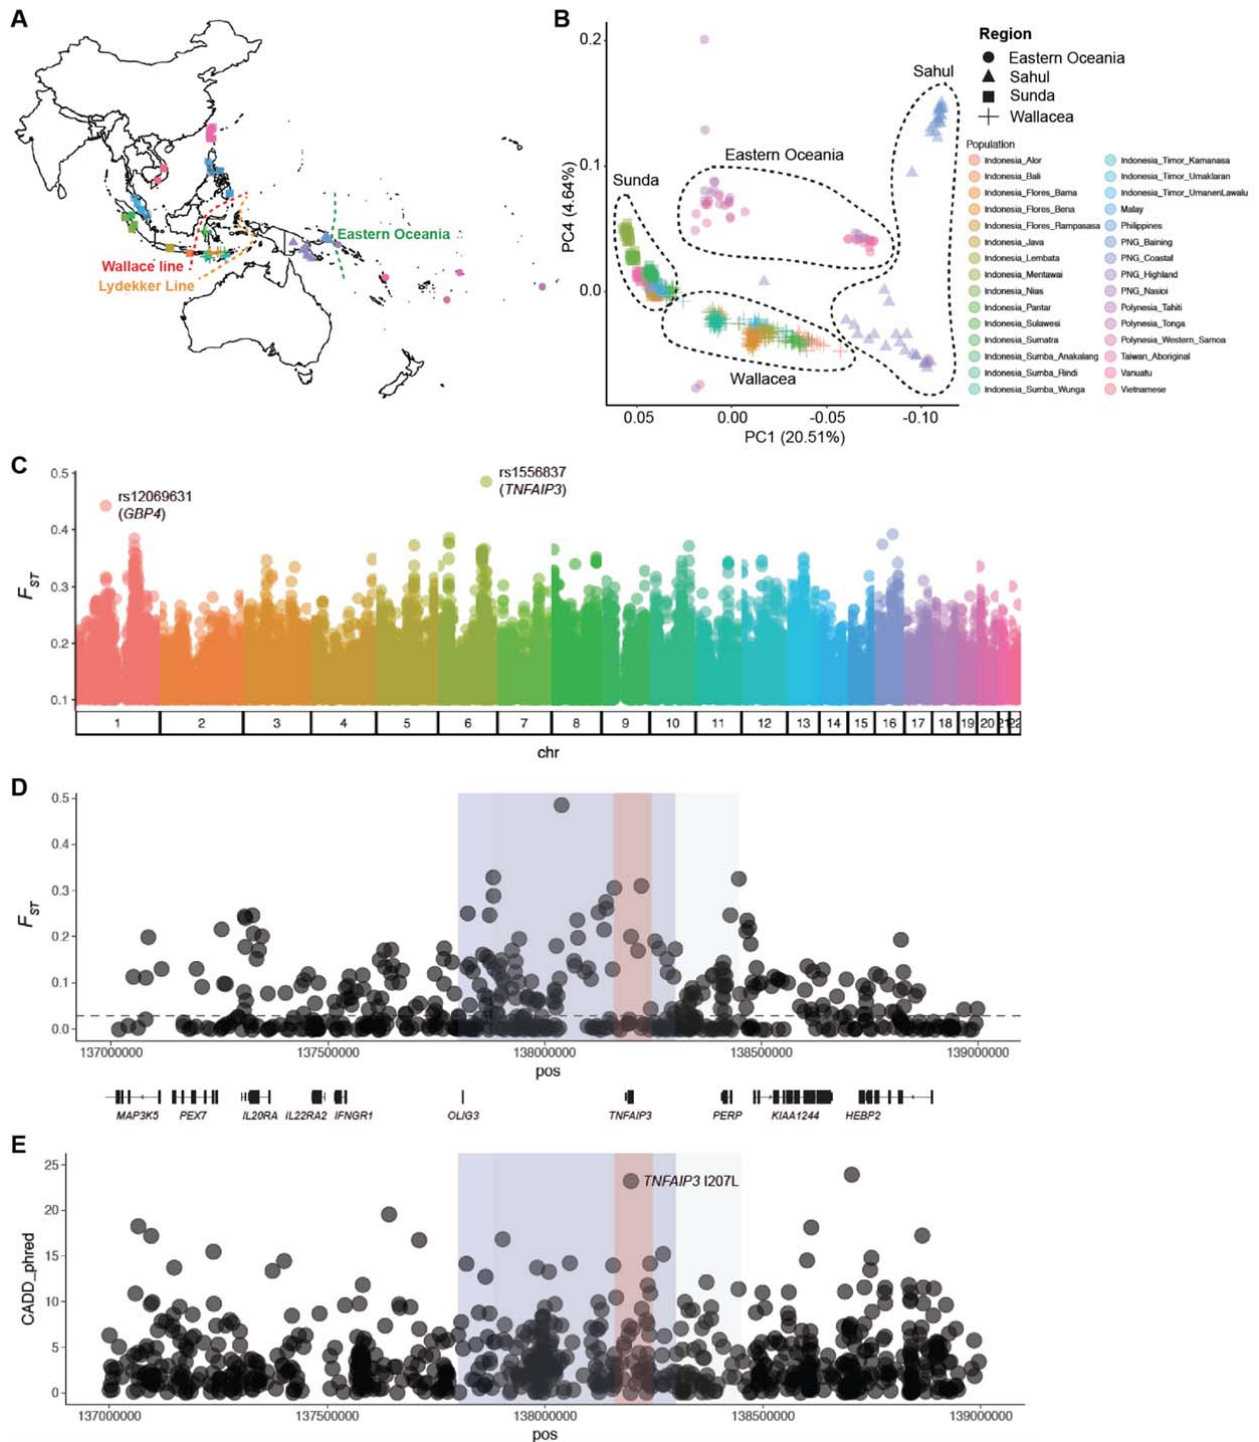

1070

1071 **Extended Data Fig. 3.**

1072 **Population genetics of the Denisovan *TNFAIP3* haplotype.** (A) Geographic distribution of  
 1073 samples used for population genetic analyses. Wallace Line (red)<sup>31</sup>, Lydekker Line (yellow).  
 1074 Eastern Oceania is defined here as islands east of the Bismarck Archipelago (green line). (B)  
 1075 Principal component analysis (PCA), with the proportion of variance explained by each PC  
 1076 indicated on each axis (C) Genome-wide  $F_{ST}$  values between indigenous populations east and  
 1077 west of the Wallace Line. (D) Maximum  $F_{ST}$  values on chromosome 6 scores span the

1078 *TNFAIP3* locus. Shaded regions correspond to peak  $F_{ST}$  values between populations east and  
1079 west of the Wallace Line (grey, 6:137881500-138448062), a previously described haplotype  
1080 of elevated Denisovan ancestry in Oceanians (blue, 6:137800000-138300000, <sup>25</sup>), and a  
1081 putatively adaptively introgressed haplotype in Papuans (red, 6:138160925-138246514, <sup>29</sup>).  
1082 **(E)** Phred-scaled CADD scores of all PASS variants with gnomAD allele frequency <0.01  
1083 across the extended Denisovan haplotype <sup>27</sup>. Shading as per panel D.  
1084  
1085  
1086  
1087  
1088  
1089

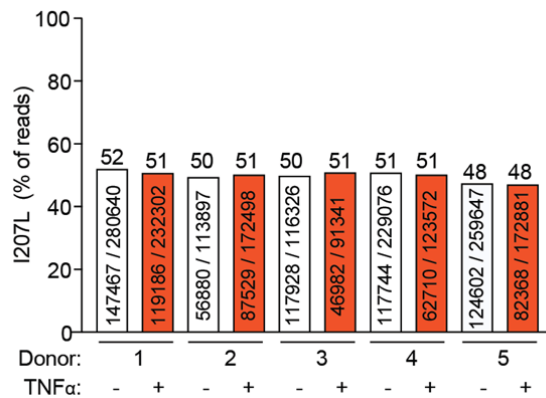

1090

#### 1091 **Extended Data Fig. 4.**

1092 **Relative abundance of Denisovan and modern human *TNFAIP3* mRNA from**  
1093 **heterozygous leukocytes.** Peripheral blood mononuclear cells from five healthy  
1094 T108A;I207L heterozygous donors were cultured with (+) or without (-) TNF $\alpha$  for 2 hours,  
1095 mRNA isolated and converted to cDNA and amplified with primers in exon 3 and 4 on either  
1096 side of the I207 codon. The products were deep sequenced on an Illumina MiSeq. Shown are  
1097 the fraction and percentage of reads derived from the T108A;I207L Denisovan allele.

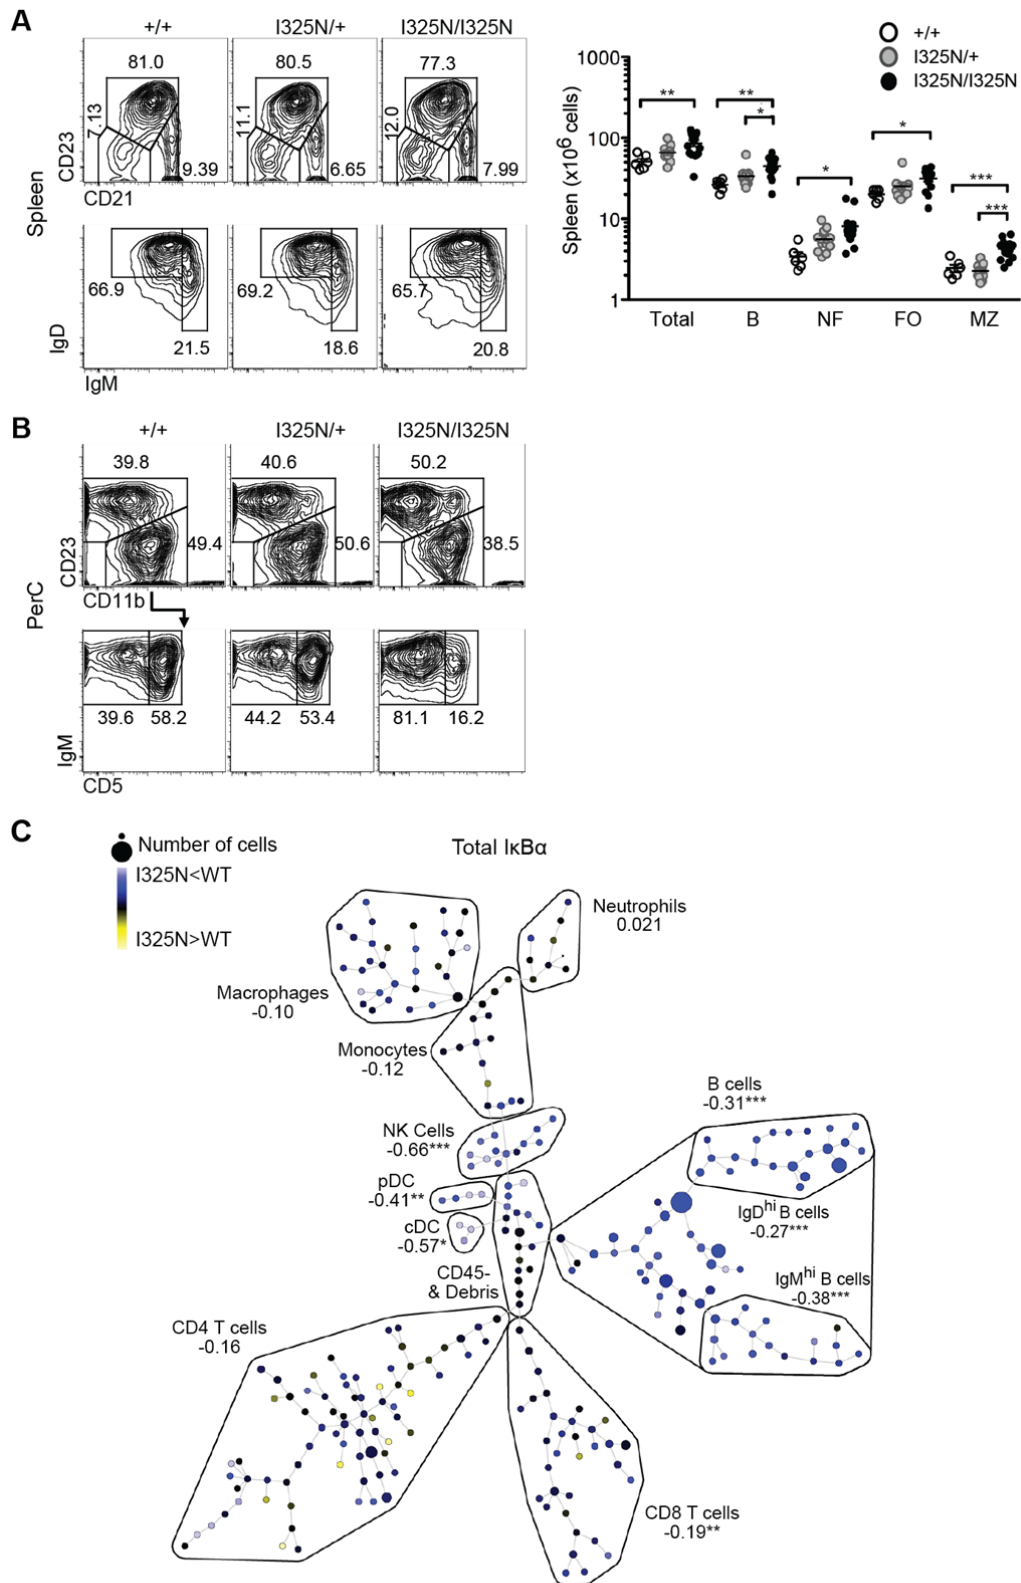

1098

1099 **Extended Data Fig. 5.**

1100 **B cell lymphocytosis induced by the *Tnfaip3*<sup>I325N</sup> mutation. (A)** Representative flow  
1101 cytometry plots from mice of the indicated genotypes showing total frequency of splenic  
1102 CD23<sup>+</sup> and CD21<sup>+</sup> positive cells (top panel). The bottom panel shows cells subsetted into  
1103 IgD<sup>+</sup> and IgM<sup>+</sup> B cells. Note that the number of splenocyte B cell subsets is increased in  
1104 *Tnfaip3*<sup>I325N/I325N</sup> mice, shown to the right. **(B)** Representative flow cytometry plots from mice  
1105 of the indicated genotypes showing the frequency of CD23<sup>+</sup> and CD21<sup>+</sup> positive cells in the  
1106 peritoneal cavity (top panel). The bottom panel shows frequency of IgM<sup>+</sup> and CD45<sup>+</sup> B cells.  
1107 Number of peritoneal cavity B cell subsets in mice of indicated genotypes is shown in Fig.  
1108 2B. **(C)** CYTOF analysis of intracellular I $\kappa$ B $\alpha$  in immune cells. Unstimulated spleen cells  
1109 from *Tnfaip3*<sup>+/+</sup> or *Tnfaip3*<sup>I325N/I325N</sup> mice ( $n=4$  per genotype) were individually labeled with  
1110 mass-barcodes, mixed, permeabilized and stained with mass-labeled antibodies to a panel of  
1111 cell surface markers and intracellular proteins including I $\kappa$ B $\alpha$ , and analyzed by CYTOF mass  
1112 spectrometry<sup>59,60</sup>. Spanning-tree Progression Analysis of Density-normalized Events  
1113 (SPADE;<sup>61</sup>) analysis was used to resolve leukocyte lineages and subsets, and the relative  
1114 intensity of I $\kappa$ B $\alpha$  in each subset was compared between *Tnfaip3*<sup>I325N/I325N</sup> and wild-type cell  
1115 counterparts. Shown by color and numbers is the mean hyperbolic arcsine (arcsinh) ratio in  
1116 minor and major leukocyte subsets. Note that I $\kappa$ B $\alpha$  levels are reduced in B cell subsets  
1117 indicating increased NF- $\kappa$ B activation. Significant differences indicated by Student's  $t$ -test  
1118 comparison of major subsets are marked: \* $P < 0.05$ ; \*\* $P < 0.01$ ; \*\*\* $P < 0.001$ .

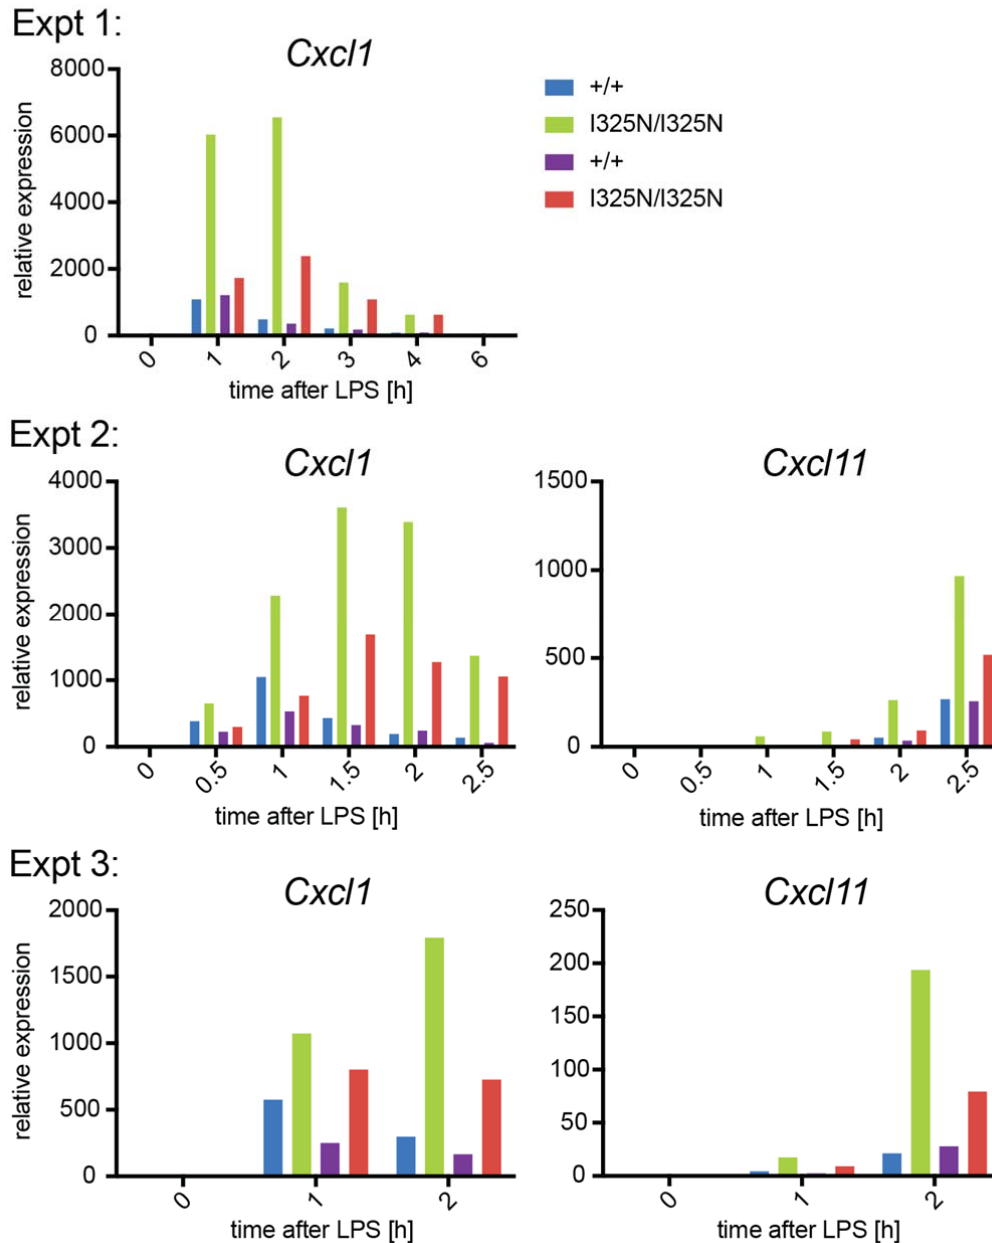

1119

1120 **Extended Data Fig. 6.**

1121 **Exaggerated cytokine production by bone marrow-derived macrophages with the**  
 1122 ***Tnfrif3*<sup>I325N</sup> mutation.** Bone marrow macrophages derived from conditionally *Hoxb8*-  
 1123 immortalized bone marrow progenitor cells were derived from two separate pairs of wild-  
 1124 type and I325N homozygous mice, stimulated with LPS (10ng/ml) for the indicated times,  
 1125 and *Cxcl1* or *Cxcl11* mRNA determined by qPCR relative to *Efla* expression. Data are  
 1126 shown from three independent experiments, each with two different mouse donors of each  
 1127 genotype.

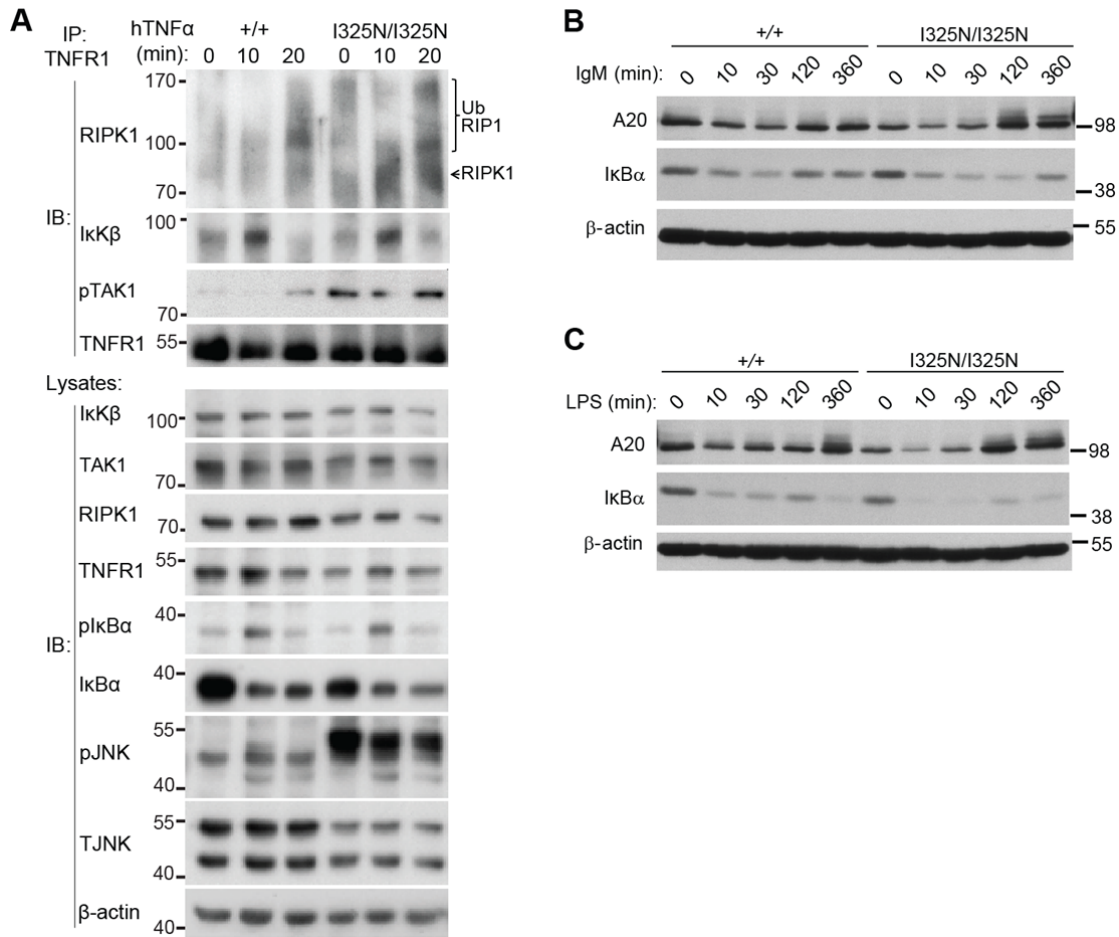

1128

1129 **Extended Data Fig. 7.**

1130 **Prolonged NF-κB signaling in thymocytes and B cells extracted from I325N variant**  
 1131 **C57BL/6 mice. (A)** Representative immunoblot analysis (IB;  $n=3$  independent experiments)  
 1132 of canonical NF-κB components following immunoprecipitation (IP) of TNFR1 from lysates  
 1133 of *Tnfaip3*<sup>+/+</sup> or *Tnfaip3*<sup>I325N/I325N</sup> thymocytes treated with 200 U/ml hTNFα for the indicated  
 1134 times. Following TNFα stimulation RIPK1 was recruited to the TNFR1 complex, with  
 1135 increased high molecular weight polyubiquitinated forms of RIPK1 (UbRIP1) and auto-  
 1136 phosphorylated transforming growth factor β activated kinase-1 [TAK1<sup>78</sup>] in A20<sup>I325N/I325N</sup>  
 1137 thymocytes (A). Mutant thymocytes exhibited a modest increase in IκBα degradation relative  
 1138 to wild-type, and increased JNK phosphorylation (Lysate blots). A similar pattern of  
 1139 enhanced TAK1 activation and JNK phosphorylation was seen in murine embryonic  
 1140 fibroblasts and bone marrow derived macrophages expressing catalytically dead A20 OTU or  
 1141 ZnF4 mutants<sup>18</sup>. **(B, C)** Wild-type (+/+) and I325N homozygous (I325N/I325N) *Tnfaip3*  
 1142 splenic B lymphocytes were stimulated for the indicated times with anti-IgM (B), or  
 1143 lipopolysaccharide (LPS) (C) and lysates analyzed by immunoblotting for A20, IκBα and β-  
 1144 actin (loading control). As observed for mutant thymocytes, B cells exhibited a modest  
 1145 increase in IκBα degradation relative to wild-type.

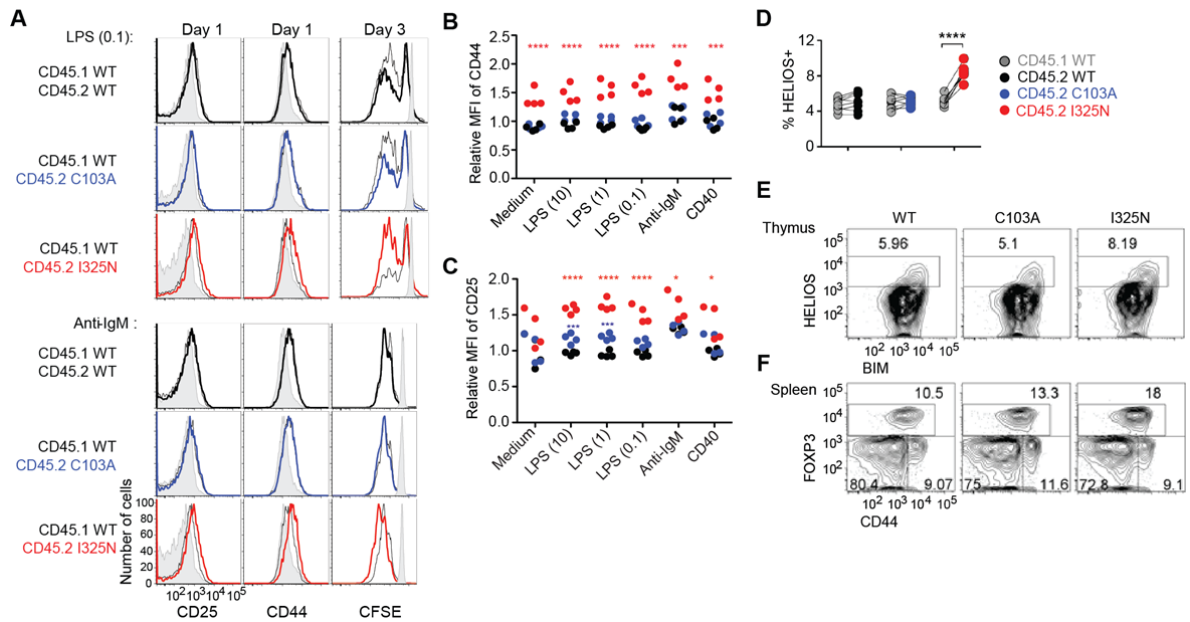

1146

1147 **Extended Data Fig. 8.**

1148 **Cell autonomous exaggeration of B cell activation and Treg formation by *Tnfrifp3***  
 1149 **I325N more than C103A mutations.** B6.CD45.1<sup>+</sup> wild-type mice were transplanted with a  
 1150 congenic bone marrow mixture from *Tnfrifp3*<sup>+/+</sup> CD45.1<sup>+</sup> donors, to provide wild-type  
 1151 lymphocytes as an internal control, and CD45.2<sup>+</sup> donors of *Tnfrifp3*<sup>I325N/I325N</sup>,  
 1152 *Tnfrifp3*<sup>C103A/C103A</sup> or *Tnfrifp3*<sup>+/+</sup> genotypes. (A) Representative flow cytometric histograms of  
 1153 CD25 and CD44 expression on B cells from chimeric mice cultured for 1 day and CFSE  
 1154 dilution after 3 days with 0.1 ug/ml LPS or anti-IgM. Black or colored histograms, CD45.2<sup>+</sup>  
 1155 B cells of the indicated *Tnfrifp3* genotype; grey line unfilled histograms, CD45.1<sup>+</sup> control B  
 1156 cells in the same stimulated culture; grey filled histograms, B cells in a parallel unstimulated  
 1157 culture. (B, C) Data from independent mixed chimeric animals showing relative mean  
 1158 fluorescence intensity (MFI) of CD25 or CD44 on CD45.2<sup>+</sup> B cells of the indicated  
 1159 genotypes (red, I325N; blue, C103A; black, WT) compared to the co-cultured CD45.1<sup>+</sup> wild-  
 1160 type B cells. Statistical analysis by ANOVA: \**P* < 0.05; \*\**P* < 0.01; \*\*\**P* < 0.001; \*\*\*\**P* <  
 1161 0.0001. Figure 2C shows the percentage of CD45.2<sup>+</sup> cells of the indicated genotypes among  
 1162 viable B cells, relative to starting percentage, in cultures from individual mixed chimera  
 1163 donors stimulated with 0.1 ug/ml LPS. (D) Pairwise comparison of percent HELIOS<sup>+</sup> cells  
 1164 among the indicated CD45.2<sup>+</sup> and CD45.1<sup>+</sup> subsets of CD4<sup>+</sup> CD8<sup>-</sup> CCR7<sup>+</sup> CD24<sup>+</sup> FOXP3<sup>-</sup>  
 1165 thymocytes from the same chimera. Analysis by paired Student's *t*-test; \*\*\*\**P* < 0.0001.  
 1166 Compared to the C103A mutation, the I325N mutation exaggerated thymic formation of  
 1167 FOXP3<sup>+</sup> CD4<sup>+</sup> cells and their Helios<sup>+</sup> FOXP3<sup>-</sup> precursors, which depend on TCR signaling  
 1168 through CARD11 to NF-κB. (E, F) Representative profiles gated on CD45.2<sup>+</sup> cells of the  
 1169 indicated *Tnfrifp3* genotypes. (E) Analysis of CD4<sup>+</sup> CD8<sup>-</sup> CCR7<sup>+</sup> CD24<sup>+</sup> FOXP3<sup>-</sup> thymocytes,  
 1170 showing the percentage of immature medullary CD4 T cells induced by strong self-reactivity  
 1171 to express high levels of HELIOS and BIM. (F) Percentage of FOXP3<sup>+</sup> CD44<sup>+</sup> cells among  
 1172 CD4<sup>+</sup> splenic T cells.



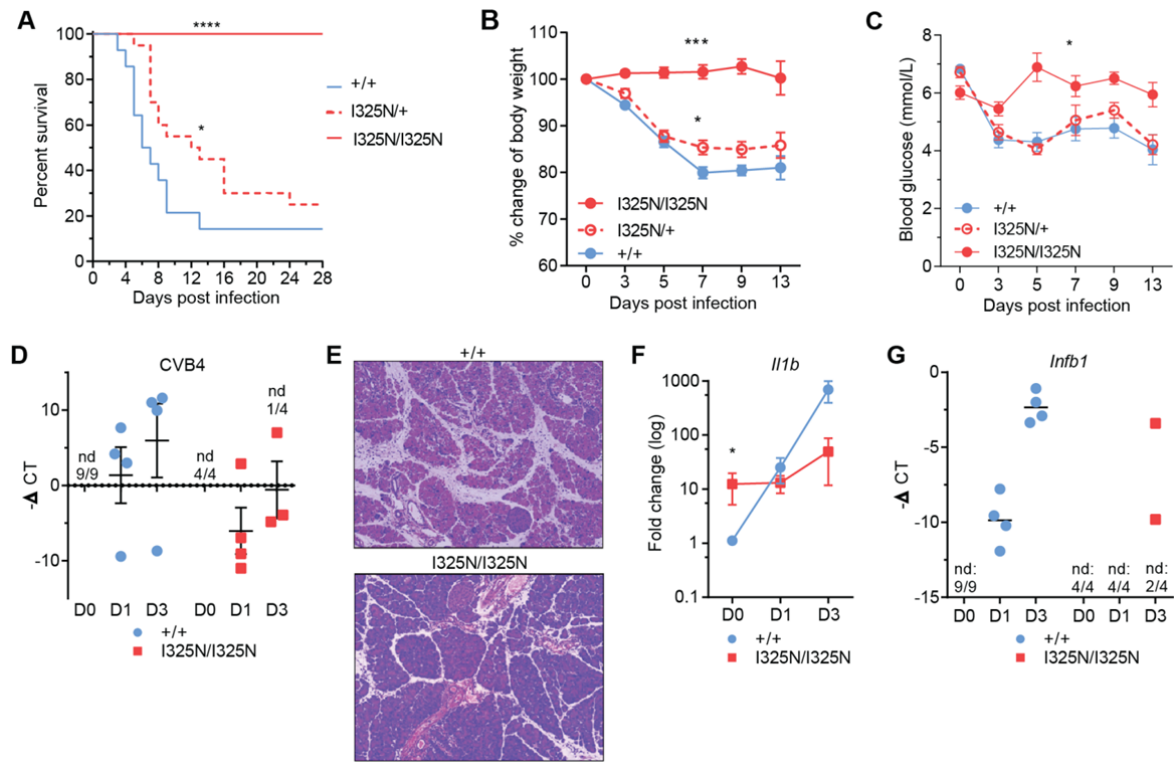

1173

1174 **Extended Data Fig. 9.**

1175 **Increased resistance to Coxsackievirus B4 in A20 I325N mice.** Infection of C57BL/6 male  
 1176 mice of the indicated *Tnfaip3* genotypes with 20 plaque forming units (PFU) of  
 1177 Coxsackievirus B4 (CVB4) E2 strain by intraperitoneal injection. **(A)** Kaplan-Meier survival  
 1178 curve showing a mean survival time of 6.5 and 12.5 days for *Tnfaip3*<sup>+/+</sup> and *Tnfaip3*<sup>+/I325N</sup>  
 1179 mice, respectively. No *Tnfaip3*<sup>I325N/I325N</sup> mice succumbed to infection. Significance  
 1180 determined by Log-rank test. **(B)** Percent change in body weight after CVB4 infection and  
 1181 **(C)** Blood glucose levels of mice with indicated *Tnfaip3* genotype, compared to wild-type by  
 1182 area under the curve analysis. **(D)** CVB4 mRNA abundance on indicated days (D0-3) post  
 1183 infection. **(E)** Hematoxylin & eosin stained sections of pancreas from *Tnfaip3*<sup>+/+</sup> and  
 1184 *Tnfaip3*<sup>I325N/I325N</sup> mice at post-infection day 9. Note better preserved pancreatic architecture in  
 1185 *Tnfaip3*<sup>I325N/I325N</sup> mice. Scale bar = 200 μm. **(F, G)** RTPCR analysis for inflammatory genes  
 1186 *Il1b* (F) or *Inf1b* (G) at post-infection day 0, 1 and 3. Error bars represent SEM and Student *t*-  
 1187 test used for significance analysis unless otherwise stated, \**P* < 0.05; \*\*\**P* < 0.001.

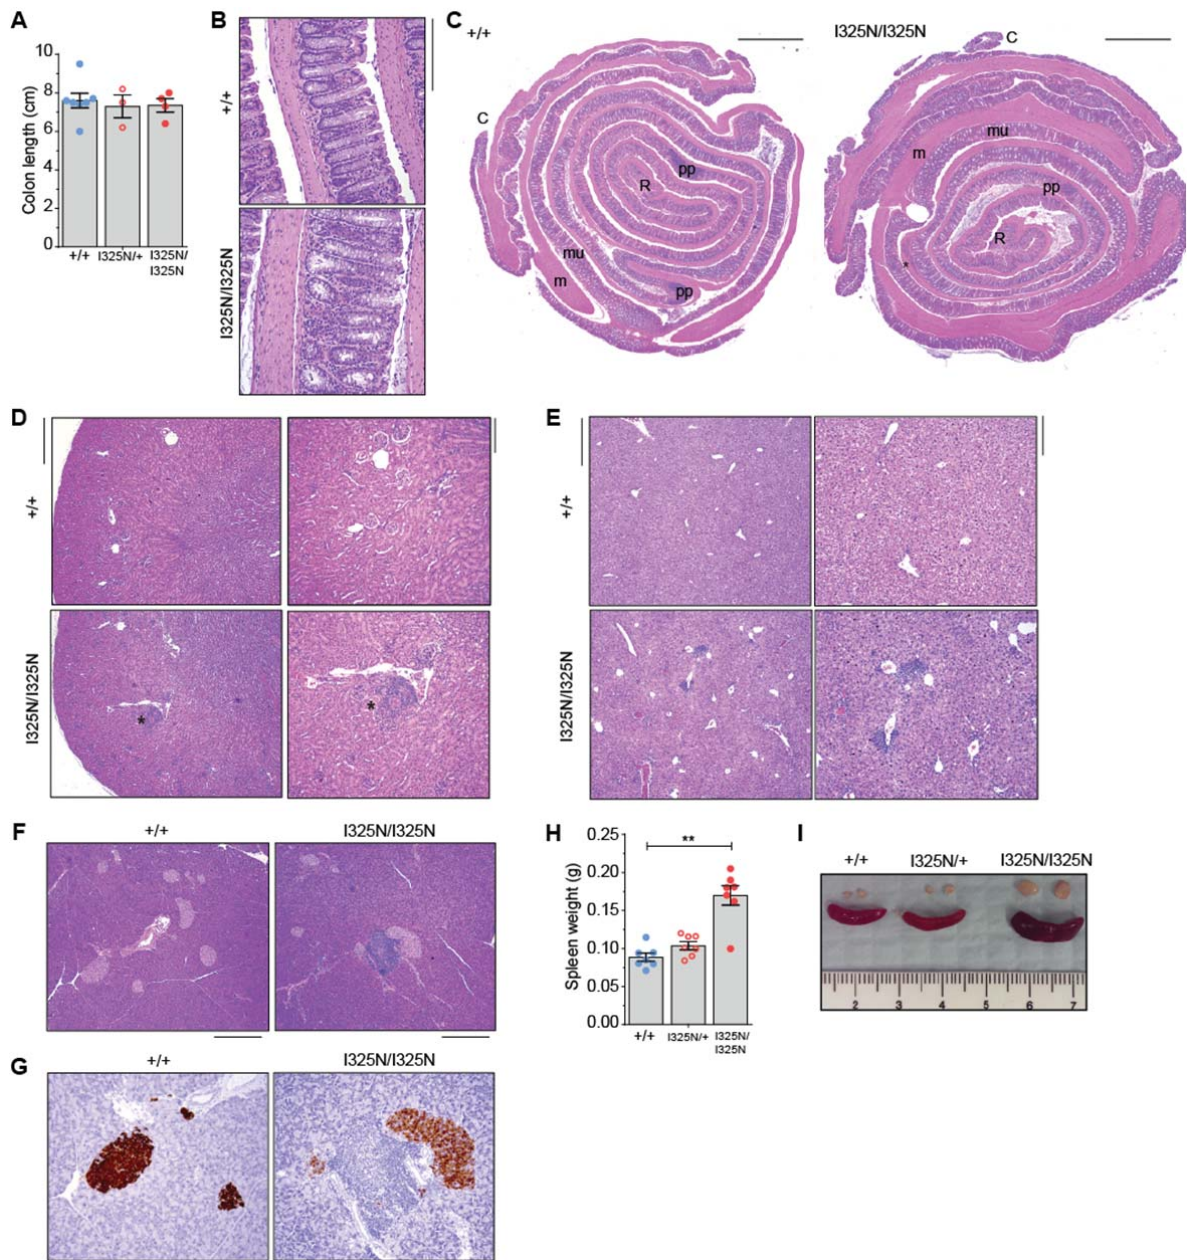

1188

1189 **Extended Data Fig. 10.**

1190 **Histological analysis of tissues from A20<sup>I325N</sup> mice.** (A) Colon length (cm) and (B)  
 1191 Hematoxylin and eosin (H&E) stained sections from *Tnfaip3*<sup>+/+</sup> and *Tnfaip3*<sup>I325N/I325N</sup> mice  
 1192 colon (20 X magnification; scale bar = 200 μm) and (C) power-mosaic image of whole colon  
 1193 cross section (R=rectum; C=Caecum; m=muscularis; mu=mucosa; pp=Peyer's patches; scale  
 1194 = 1 mm). (D) H&E sections of kidney (4 X left images, scale bar = 500 μm; 10 X right  
 1195 images, scale bar = 200 μm) and (E) liver (4 X left images, scale bar = 500 μm; 10 X right  
 1196 images, scale bar = 200 μm). (F) H&E stained sections of pancreas (10 X images, scale bar =  
 1197 200 μm) or, (G) insulin stained sections (20 X images, scale bar = 100 μm). (H) Weight of  
 1198 spleens in grams (g). (I) Gross appearance of spleen and salivary glands from *Tnfaip3*<sup>+/+</sup> and  
 1199 *Tnfaip3*<sup>I325N/I325N</sup> mice. Images are representative from n=4 *Tnfaip3*<sup>+/+</sup> and n=4  
 1200 *Tnfaip3*<sup>I325N/I325N</sup> 16 week old mice. Error bars represent SEM, \*\*P < 0.01.

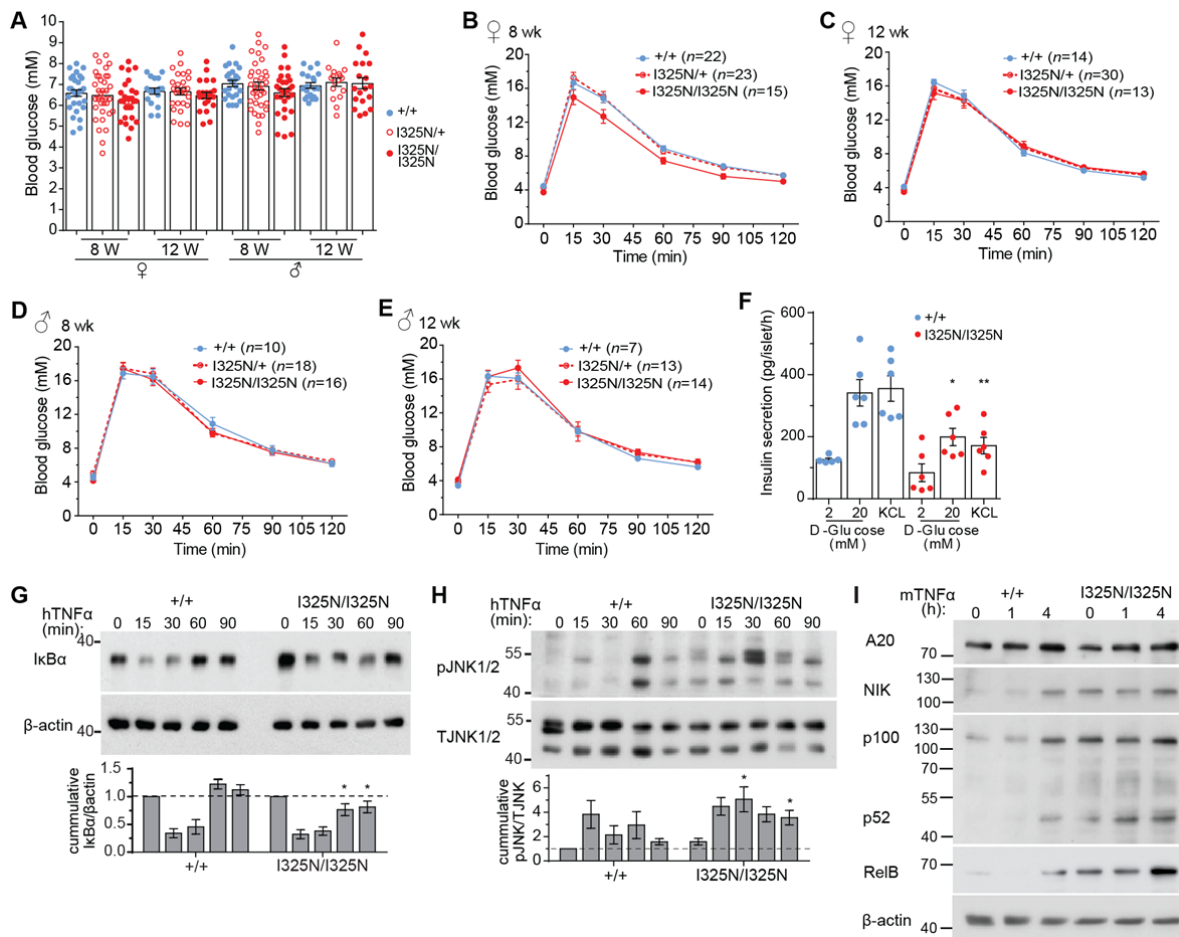

1201

1202 **Extended Data Fig. 11.**

1203 **Glucose homeostasis of A20<sup>I325N</sup> mice and isolated islets.** (A) Random blood glucose levels  
 1204 of *Tnfaip3*<sup>+/+</sup>, *Tnfaip3*<sup>I325N/+</sup> or *Tnfaip3*<sup>I325N/I325N</sup> female (♀) or male (♂) mice at 8 or 12 weeks  
 1205 of age. (B-E) Blood glucose levels (mM) were monitored following an intraperitoneal  
 1206 injection of glucose (2 g/kg) in 8 (B, D) or 12 week-old (C, E) mice. (F) Pancreatic islets  
 1207 were isolated from individual mice of the indicated A20 genotypes and incubated overnight.  
 1208 Following incubation an *in vitro* Glucose-Stimulated Insulin Secretion (GSIS) response in  
 1209 conditions of 2 mM, 20 mM D-glucose, or 25 mM KCl was conducted in separate groups of  
 1210 islets. Error bars represent SEM and Student's *t*-test used for significance between treatments,  
 1211 \**P* < 0.05; \*\**P* < 0.01. (G-H) Pancreatic islets were isolated from individual mice of the  
 1212 indicated A20 genotypes, incubated overnight, and treated with 200 U/ml TNFα for the  
 1213 indicated times. (G) Representative immunoblot for IκBα and β-actin (loading control) or (H)  
 1214 phosphorylated JNK (pJNK) and total JNK (TJNK, loading control). Cumulative  
 1215 densitometry from 5 independent experiments is shown below (*n*=5 *Tnfaip3*<sup>+/+</sup> and *n*=6  
 1216 *Tnfaip3*<sup>I325N/I325N</sup> biological replicates). (I) Immunoblot for non-canonical NF-κB components  
 1217 NIK, p100/p52 and RelB; representative of 2 independent experiments. *Tnfaip3*<sup>I325N/I325N</sup>  
 1218 islets exhibited increased activation of the non-canonical NF-κB pathway that can alter beta  
 1219 cell transcriptional programs to favor reduced insulin output<sup>38</sup>.

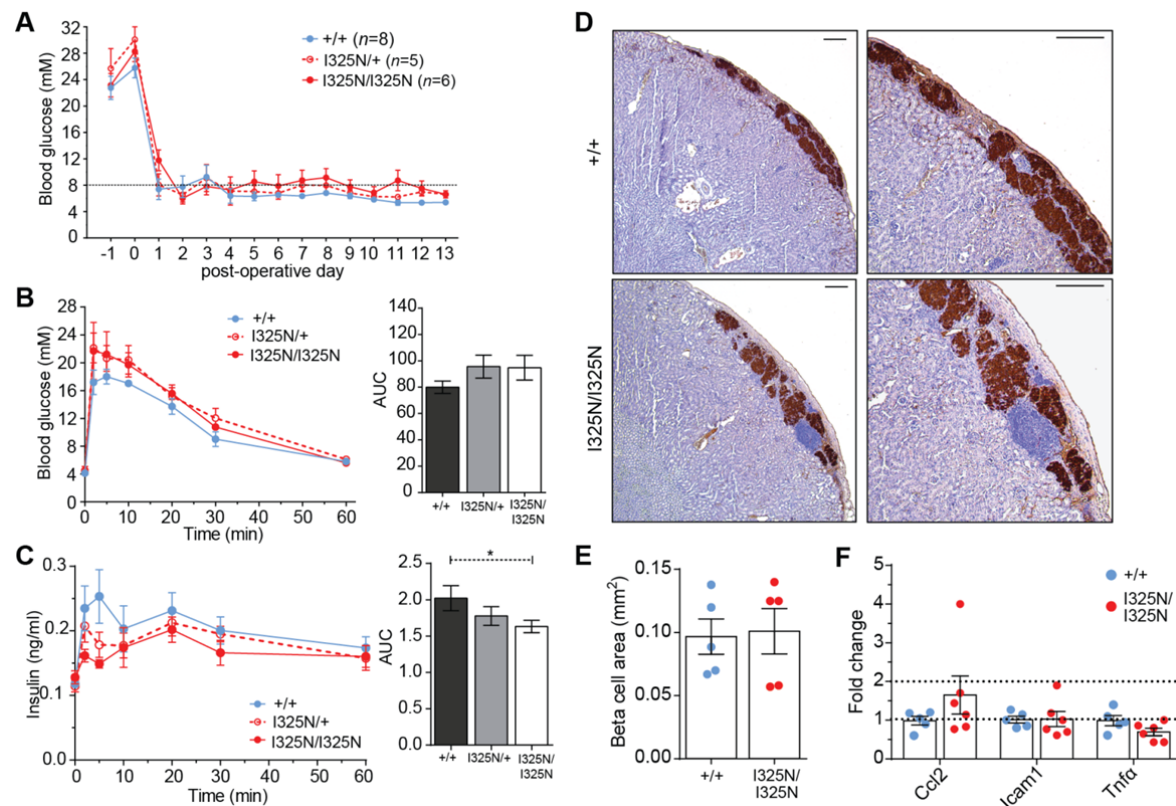

1220

1221

### Extended Data Fig. 12.

1222

**A20<sup>I325N</sup> islet grafts exhibit a reduced first-phase insulin secretory response compared to wild-type A20 islet grafts independent to beta cell area.** (A) Islets isolated from B6 mice

1223

of the indicated genotypes were transplanted under the kidney capsule of *Tnfaip3*<sup>+/+</sup> B6

1224

recipients that had been rendered diabetic with streptozotocin. Mean and SEM blood glucose

1225

on the indicated days relative to islet transplantation is shown. (B-C) At post-operative day

1226

14 when euglycemia was established, mice were challenged with an (B) intravenous injection

1227

of glucose (1 g/kg), and blood glucose monitored over time (min). (C) Blood insulin levels

1228

(ng/ml) were also measured at the same time points via an enzyme-linked immunosorbent

1229

assay from samples in (B). AUC = area under the curve. Error bars represent SEM and

1230

ANOVA used for significance, \**P* < 0.05. (D) Insulin immunostaining of wild-type

1231

(*Tnfaip3*<sup>+/+</sup>) or A20 I325N homozygous mutant (*Tnfaip3*<sup>I325N/I325N</sup>) islet grafts transplanted

1232

under the kidney capsule of diabetic C57BL/6 mice for 30 days (*Tnfaip3*<sup>+/+</sup> > *Tnfaip3*<sup>+/+</sup> *n* =

1233

5; *Tnfaip3*<sup>I325N/I325N</sup> > *Tnfaip3*<sup>+/+</sup> *n* = 5). (E) Islet graft beta cell area was determined by insulin-

1234

positive area quantification in continuous serial graft sections. *Tnfaip3*<sup>I325N/I325N</sup> grafts

1235

exhibited equivalent insulin-positive graft area, confirming that loss of glucose tolerance (B,

1236

C) was due to a defect in insulin secretion. (F) *Tnfaip3*<sup>+/+</sup> or *Tnfaip3*<sup>I325N/I325N</sup> islet grafts from

1237

an independent cohort of recipients were isolated on post-operative day 10 and analyzed for

1238

the indicated mRNAs by RT-qPCR<sup>77</sup>. The difference in gene expression of indicated islet

1239

grafts is shown. Fold change calculated using average wild-type  $\Delta$ Ct value.

1240

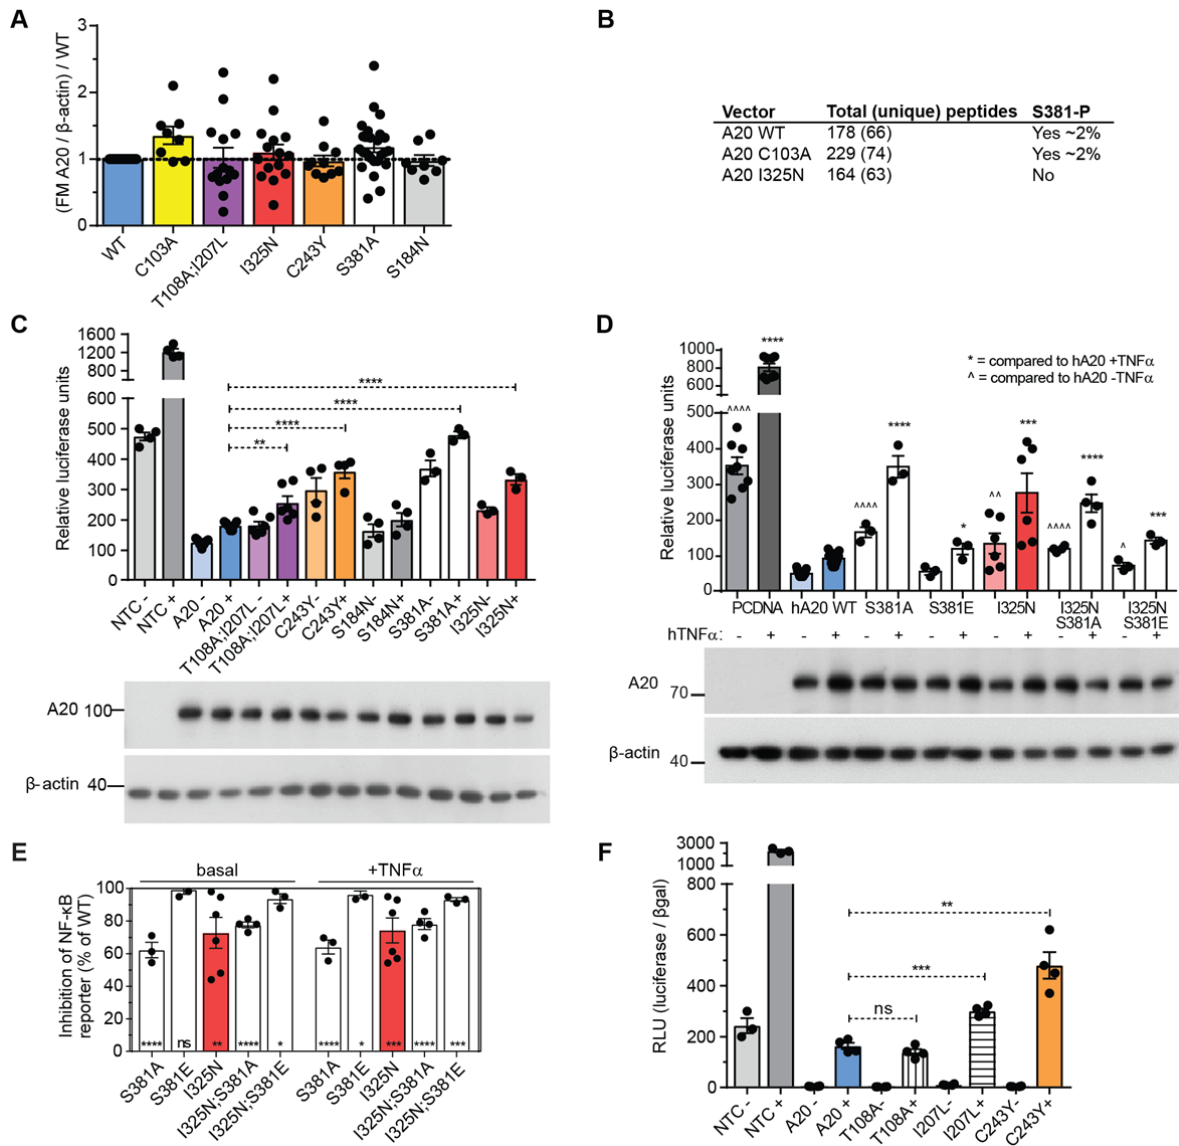

1241

1242 **Extended Data Fig. 13.**

1243 ***In vitro* analysis of missense variant effects on A20 control of NF- $\kappa$ B.** (A) A20  
 1244 accumulation in  $\beta$ TC3 mouse insulinoma cells transfected with wild-type (WT) A20, C103A  
 1245 A20, T108A;I207L A20, I325N A20, C243Y A20, S381A A20 or S184N A20 was  
 1246 determined by densitometry analysis of experimental immunoblots. Fast migratory (A20) 98  
 1247 kDa A20 was corrected to loading control and compared to WT A20 of the same immunoblot  
 1248 [(FM A20/ $\beta$ -actin)/A20]. (B) Results of mass spectrometry analysis of full length WT A20,  
 1249 C103A mutant A20, or I325N mutant A20 expressed in and purified from HEK293 cells and  
 1250 analysed by mass spectrometry for phosphorylation of the indicated residues as per references  
 1251 <sup>18,19</sup>. (C)  $\beta$ TC3 cells co-transfected with an NF- $\kappa$ B.luciferase reporter and a CMV. $\beta$ gal  
 1252 expression construct alone or with PCDNA3.1 encoding human wild-type A20 (hA20 WT;  
 1253 blue), A20 T108A/I207L (purple), A20 C243Y (orange), A20 S184N (grey), A20 I325N  
 1254 (red) or A20 S381A (white). Cells were stimulated with (+) 200 U/ml hTNF $\alpha$  for 8 h or left  
 1255 untreated (-). Data presented as relative luciferase units. Each column represents 3-5  
 1256 independently transfected aliquots of cells within one experiment marked by circle symbols  
 1257 (representative of 3 independent experiments) and columns are arithmetic means. Statistical

1258 comparison by Student's *t*-test against WT hA20 (blue). **(D-F)**  $\beta$ TC<sub>3</sub> cells co-transfected with  
1259 a NF- $\kappa$ B.luciferase reporter and a CMV. $\beta$ gal expression construct alone or with PCDNA3.1  
1260 encoding human wild-type A20 (hA20 WT; blue), or (D) A20 I325N variant (I325N; red), or  
1261 A20 with serine 381 substituted to non-phosphorylatable alanine (S381A or I325N S381A),  
1262 or to phosphomimetic glutamate (S381E or I325N;S381E), (F) or A20 with the point variants  
1263 T108A (vertical stripes), I207L (horizontal stripes) or C243Y (orange). Cells were stimulated  
1264 with (+) 200 U/ml hTNF $\alpha$  for 8 h or left untreated (-). In (E) the two missense variants in the  
1265 Denisovan haplotype, T108A and I207L, are tested individually (cross-hatched columns).  
1266 Data presented as relative luciferase units. Each column represents mean of 3-6  
1267 independently transfected aliquots of cells within one experiment marked by circle symbols  
1268 (representative of 3 independent experiments) and columns are arithmetic means. Statistical  
1269 comparison by Student's *t*-test against WT hA20 (blue) with TNF $\alpha$  (+) indicated by \* or  
1270 without (-) indicated by ^. In (F), data from (D) are presented as inhibition of NF- $\kappa$ B reporter  
1271 as a percent of WT A20. Error bars represent SEM, \**P* < 0.05; \*\**P* < 0.01; \*\*\**P* < 0.001;  
1272 \*\*\*\**P* < 0.0001.

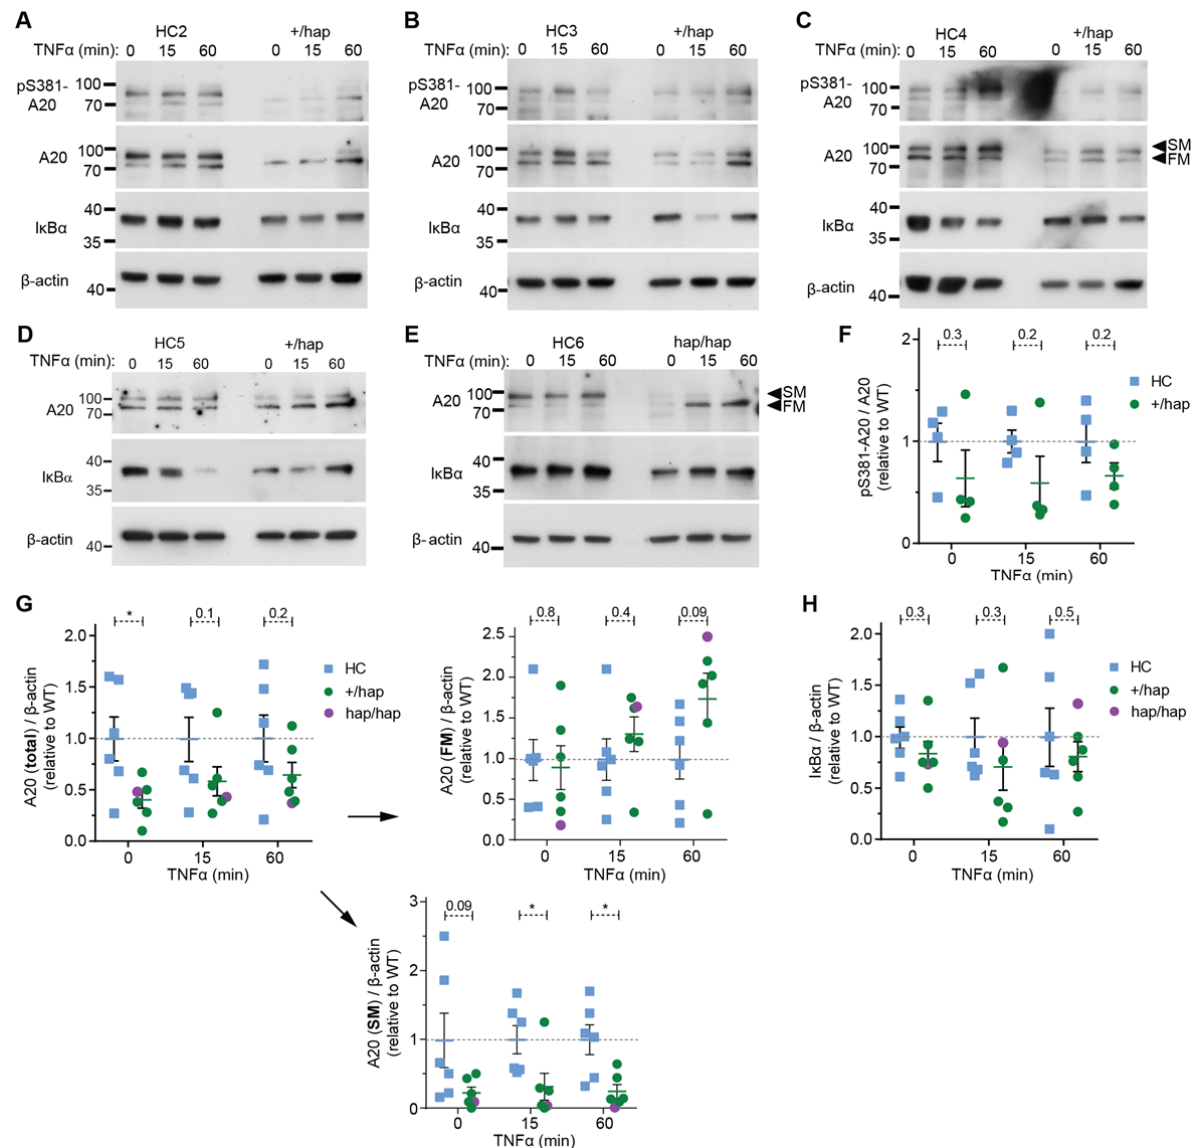

1273

1274 **Extended Data Fig. 14.**

1275 **Immunoblot analysis of peripheral blood mononuclear cells from healthy individuals**  
 1276 **with the T108A I207L haplotype.** (A-E) Immunoblot analysis of peripheral blood  
 1277 mononuclear cells (PBMC) from individuals with the Denisovan *TNFAIP3* haplotype (hap)  
 1278 or without (healthy control donor; HC). PBMCs were left untreated or stimulated with  
 1279 recombinant human TNF $\alpha$  (hTNF $\alpha$ ) for 15 or 60 min. Proteins assessed include A20,  
 1280 phosphoserine-A20 (pS381-A20), I $\kappa$ B $\alpha$  and  $\beta$ -actin (loading control). (F) Densitometry  
 1281 analysis of pS381-A20 levels in immunoblots A-C and Fig. 4D. Densitometry was calculated  
 1282 by correcting to total A20 present and using the average value from samples without the  
 1283 T108A;I207L haplotype (HC) to compare all samples. (G) Densitometry analysis of total  
 1284 A20 levels in immunoblots A-C and Fig. 4D. Densitometry was calculated by correcting to  $\beta$ -  
 1285 actin loading control and using the average WT value to compare all samples. (G) is further  
 1286 divided into fast migrating (FM) or slow migrating (SM) A20. No significant difference is  
 1287 observed for FM A20 between hap or HC individuals. In contrast, a significant difference is  
 1288 observed between hap and HC individuals for SM A20, which correlates with phosphorylated  
 1289 A20 in *in vitro* studies (Fig. 4D, E)<sup>18,19</sup>; consistent with reduced phosphorylation for A20

1290 T108A;I2107L. **(H)** Densitometry analysis of I $\kappa$ B $\alpha$  levels in immunoblots A-C and Fig. 4D.  
1291 Densitometry was calculated by correcting to  $\beta$ -actin loading control and using the average  
1292 value from samples without the T108A;I207L haplotype (HC) to compare all samples. Each  
1293 symbol represents an individual lane in immunoblot. Error bars represent SEM and Student's  
1294 *t*-test used for significance analysis unless otherwise stated, \**P* < 0.05.



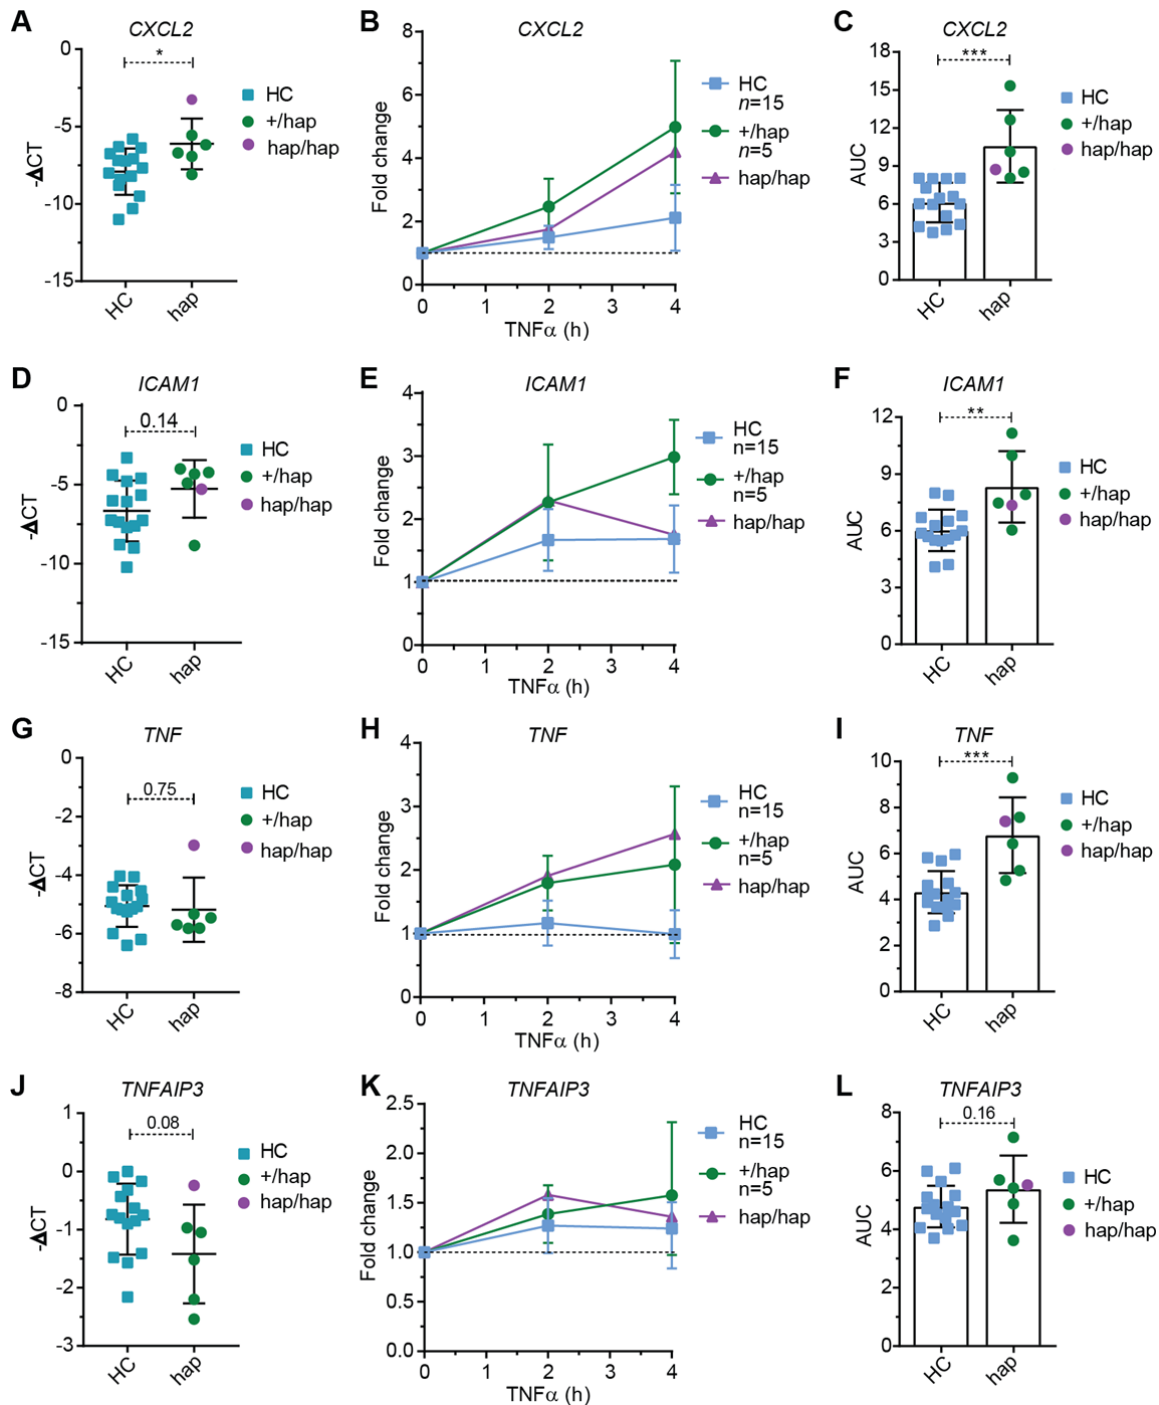

1295

1296 **Extended Data Fig. 15.**

1297 **Peripheral blood mononuclear cells from individuals with the Denisovan *TNFAIP3***  
 1298 **T108A;I207L haplotype are hyper-inflammatory.** RT-PCR analysis of *CXCL2*, *ICAM1*,  
 1299 *TNF*, and *TNFAIP3* genes expression from peripheral blood mononuclear cells (PBMCs)  
 1300 from individuals heterozygous (green circles) or homozygous (purple circle) for the  
 1301 Denisovan *TNFAIP3* haplotype (hap) and 15 healthy control donors (HCs; blue squares),  
 1302 comparing negative  $\Delta CT$  basal expression levels (A, D, G, J) or induction kinetics following  
 1303 stimulation with recombinant human  $TNF\alpha$  for 0 2 or 4 h (B, E, H, K). Fold change was  
 1304 determined by comparing stimulated values against non-stimulated PBMC preparations

1305 within the same group. Significance between groups was determined by area under the curve  
1306 analysis (**C, F, I, L**). Error bars represent SD and Student's *t*-test used for significance  
1307 analysis unless otherwise stated, \**P* < 0.05; \*\*\**P* < 0.001.

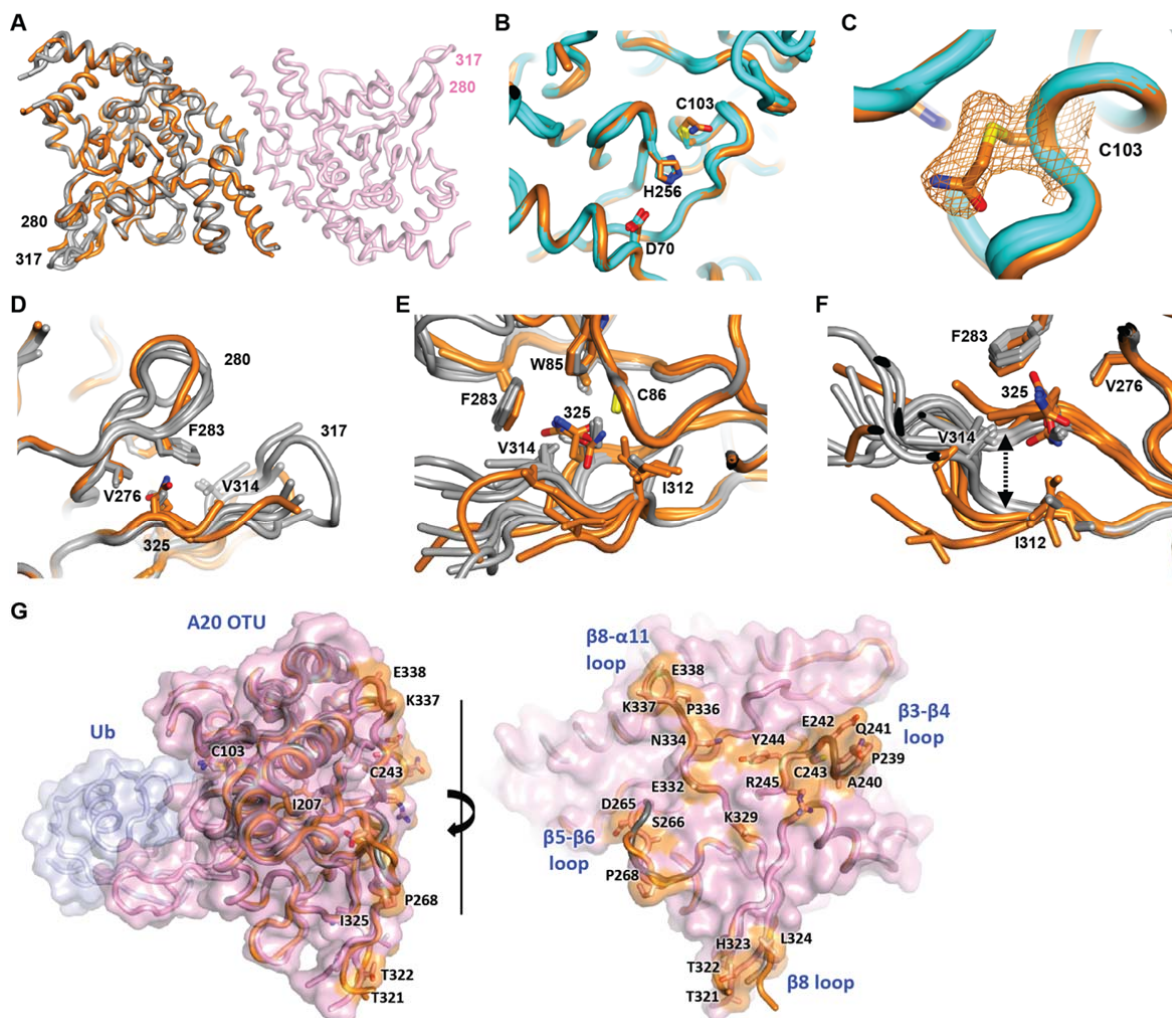

1308

1309

### Extended Data Fig. 16.

1310 **A20<sup>I325N</sup> mutation subtly impacts the OTU structure.** (A) Structures of human I325N  
 1311 variant (orange) and wild-type (WT; grey) A20 OTU domains superposed (each with 6  
 1312 molecules per asymmetric unit). The dimer partner of one of these is shown in pink. Loop  
 1313 317 and 280 are indicated on the periphery. (B) The I325N substitution does not alter the fold  
 1314 of the putative catalytic triad (orange cartoon and sticks) compared to previously published  
 1315 wild-type structures (cyan cartoon and sticks; PDB entries 3DKB, 2VFJ and 3ZJD). (C) The  
 1316 fold is additionally unperturbed by acetamidylation of C103 (orange mesh; 2mFo-DFc  
 1317 composite omit map contoured at 1.2 sigma). (D-F) The I325N substituted side-chain sits at  
 1318 the base of the  $\beta$ 7- $\beta$ 8 loop containing residue 317, in a pocket also lined by the  $\beta$ 6- $\alpha$ 9 loop  
 1319 containing residue 280 (D). Adjacent hydrophobic residues include W85, V276, F283, I312,  
 1320 V314 (E). The I325N substitution results in the base of the  $\beta$ 7- $\beta$ 8 loop splaying apart (F,  
 1321 arrow), increasing  $\beta$ 7- $\beta$ 8 loop disorder. (G) Structures of human I325N variant (orange) and  
 1322 wild-type (WT; grey) A20 OTU domains superposed on the wild-type OTU-ubiquitin  
 1323 structure 5LRX<sup>42</sup>. Conserved residues on the posterior surface are coloured orange. The  $\beta$ 3-  
 1324  $\beta$ 4 loop containing the C243Y mutation and the structured base of the  $\beta$ 7- $\beta$ 8 loop containing  
 1325 the I325N mutation are marked.

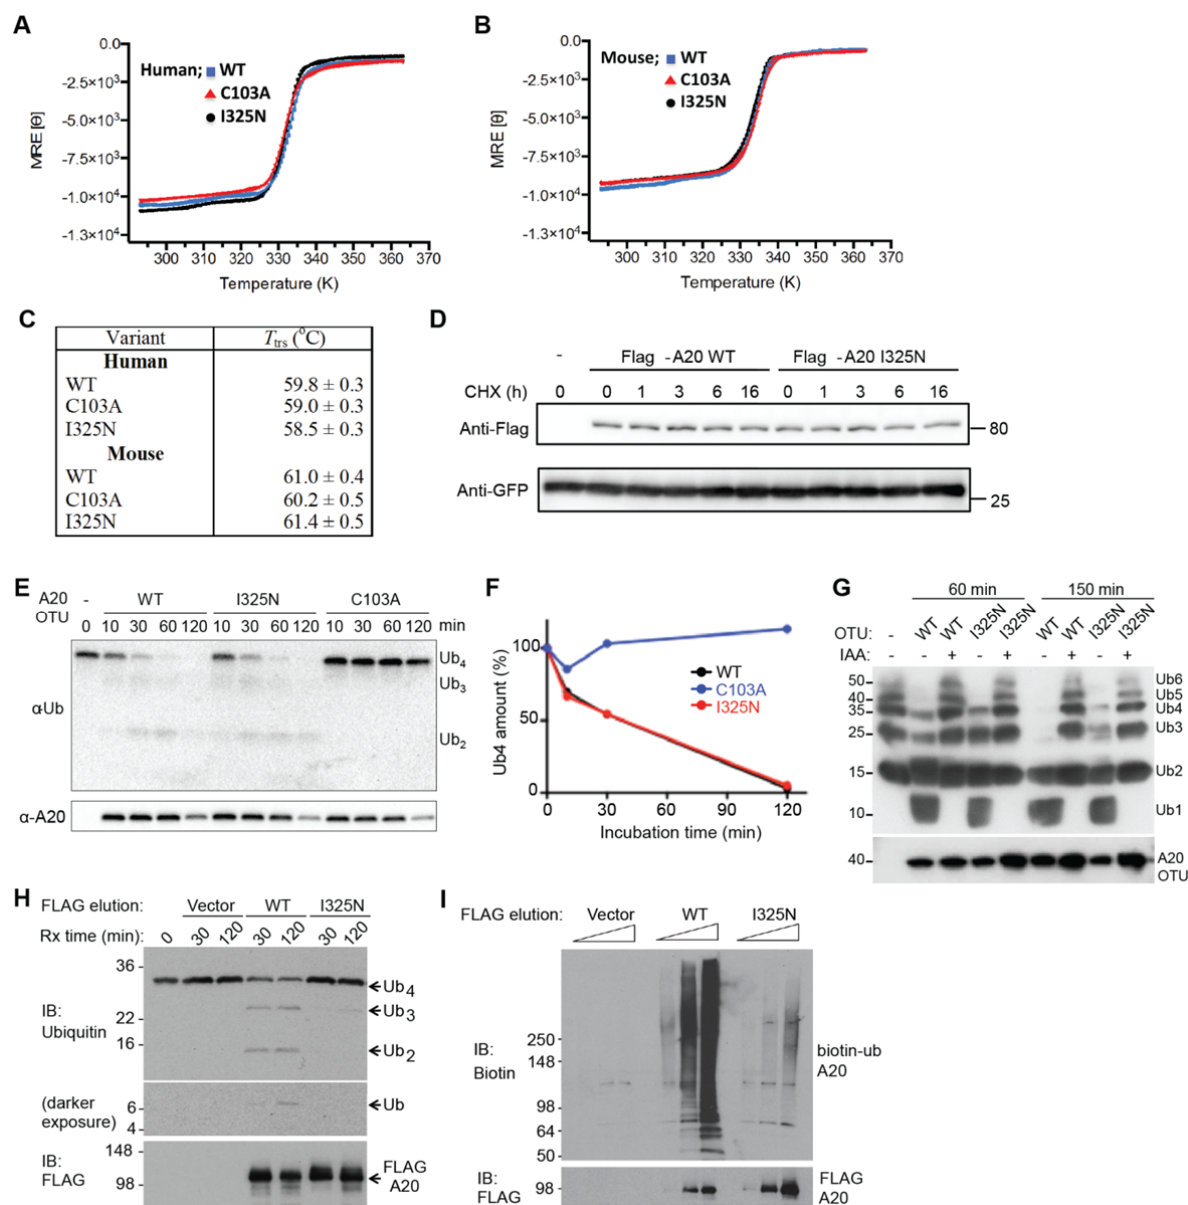

1326

1327 **Extended Data Fig. 17.**

1328 **Molecular characterization of A20 I325N and A20 C103A.** (A-B) Thermal stability of  
 1329 mouse and human WT, C103A, and I325N variants were examined using circular dichroism,  
 1330 where mean residue ellipticity (MRE) was measured at 220 nm as a function of temperature  
 1331 as solutions were heated at a rate of 1 $^{\circ}$ C/min. Human (A) or mouse (B) A20 OTU residues 1-  
 1332 370; WT (blue squares), C103A (red triangles), I325N (black circles). Curves were fit by  
 1333 linear regression. (C) Unfolding transitions temperature ( $T_{trs}$ ) of human A20 OTU variants  
 1334 (residues 1-370) and mouse variants (residues 1-360), derived from the fit of the curves in  
 1335 (A) and (B). (D) HEK293T cells were transfected with bicistronic retrovirus vector pMXs-  
 1336 IRES-GFP, expressing FLAG-tagged mouse full-length TNFAIP3 wild-type or I325N. Each  
 1337 group of transfected cells was replated 24 h after transfection and incubated with 10  $\mu$ M of  
 1338 cycloheximide (CHX) for the indicated times before harvesting. Lysates were probed with  
 1339 anti-FLAG and anti-GFP antibodies. (E, F) Reactions containing K48-linked tetra-ubiquitin  
 1340 ( $Ub_4$ ) and *E. coli*-expressed and purified WT or I325N A20 OTU domain, or the catalytically

1341 deactivated A20 OTU domain, C103A, were incubated for the indicated times.  
1342 Depolymerization of polyubiquitin was detected by immunoblotting for ubiquitin and A20;  
1343 representative of two independent experiments. **(G)** Reactions containing mixed Ub<sub>2</sub>-Ub<sub>6</sub>  
1344 K48-linked polyubiquitin chains and *E. coli*-expressed and purified WT or I325N A20 OTU  
1345 domain ± iodoacetamide (IA) treatment were incubated at 37°C for 60 or 150 minutes.  
1346 Depolymerization of polyubiquitin was detected by immunoblotting for ubiquitin and the N-  
1347 terminus of A20; representative of 4 independent experiments. **(H, I)** Flag-tagged full length  
1348 human A20 proteins (WT or I325N mutant) were expressed in HEK-293T cells and purified  
1349 as previously described<sup>14</sup>. Purified A20 proteins were tested for K63-linked tetra-ubiquitin  
1350 depolymerization (H) and *in vitro* ubiquitination assay (I).

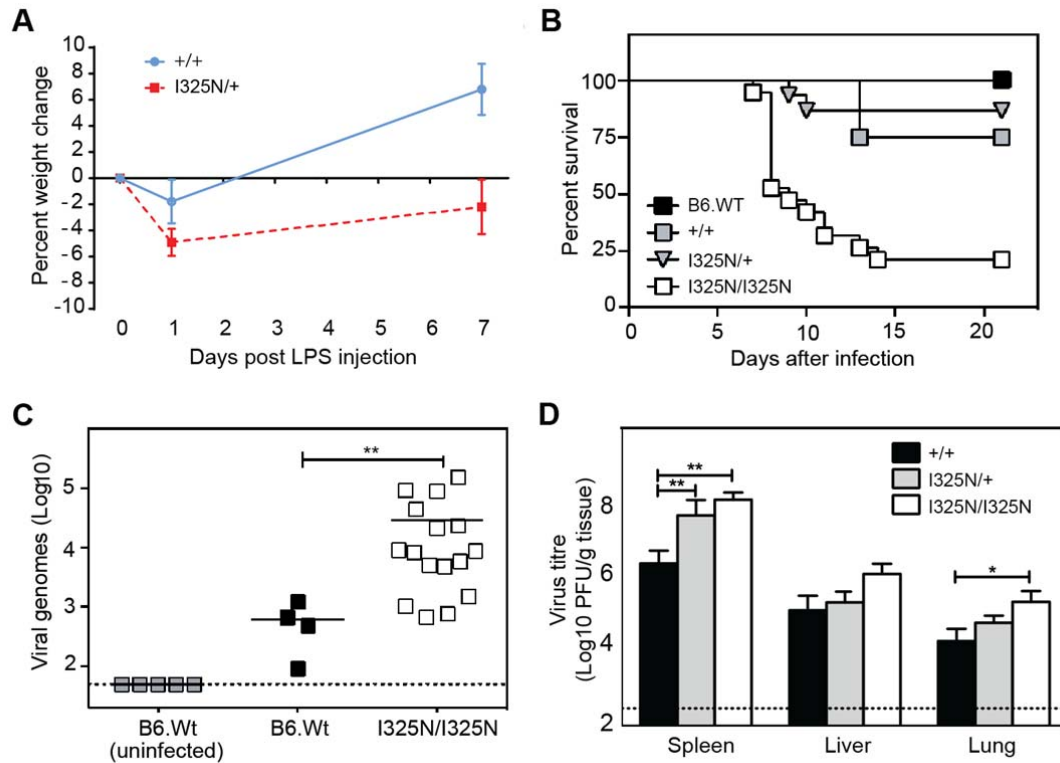

1351

1352 **Extended Data Fig. 18.**

1353 **A20 I325N are susceptible to LPS injection and poxvirus infection.** (A) Daily body  
 1354 weights for *Tnfaip3*<sup>+/+</sup> or *Tnfaip3*<sup>I325N/+</sup> mice administered 50 µg bacterial LPS by  
 1355 intraperitoneal injection. (B-D) Ectromelia virus infection of B6 male siblings of the  
 1356 indicated *Tnfaip3* genotypes and wild-type B6 control mice, showing (B) Kaplan-Meier  
 1357 survival plots and (C) viral load in blood on day 8; \*\**P* < 0.005 by unpaired *t* test. (D) Virus  
 1358 load in spleen, liver and lung, respectively. Data expressed as mean ± SEM; data was log-  
 1359 transformed and statistical significance determined by 2-way ANOVA; \**P* < 0.05, \*\**P* <  
 1360 0.01. Dotted lines in (C, D) denote limit of detection.

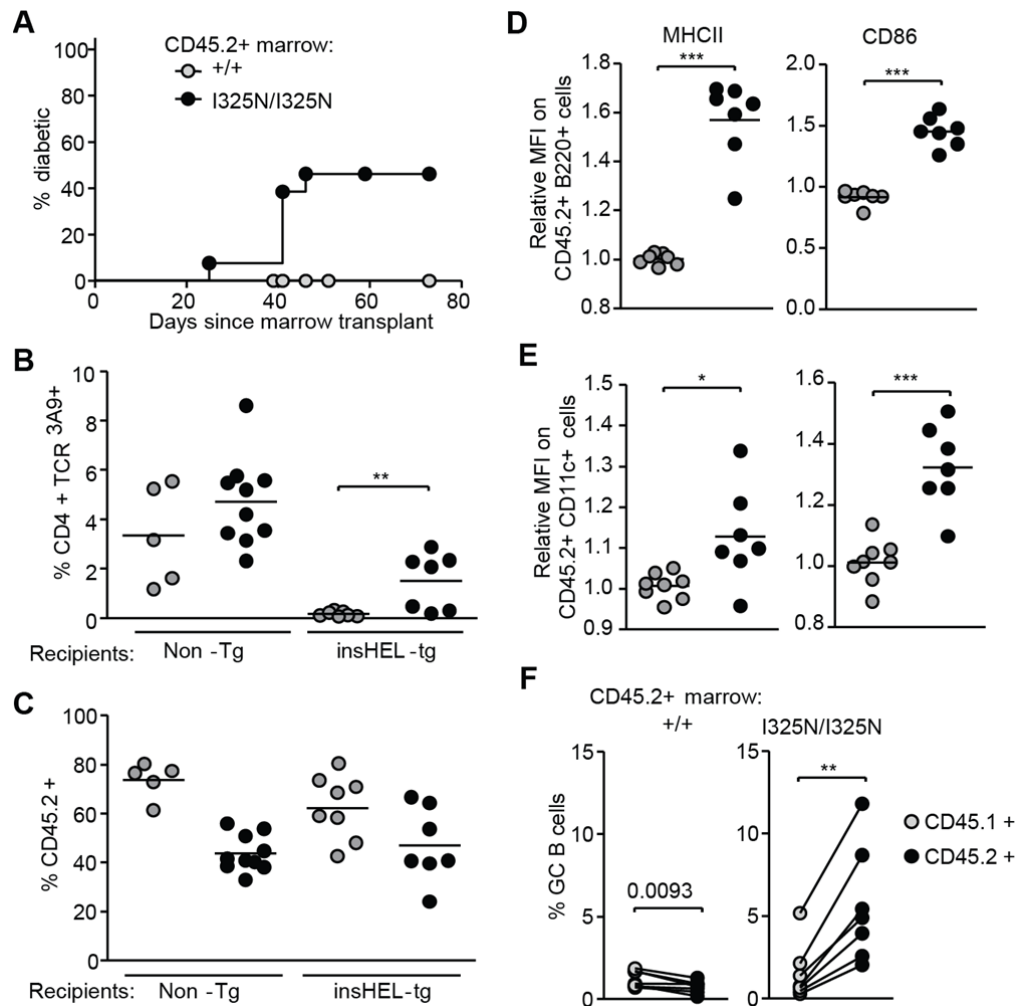

1361

1362 **Extended Data Fig. 19.**

1363 **Diminished tolerance to self-antigen caused by mutant A20.** InsHEL-transgenic mice or  
 1364 non-transgenic controls, both with wild-type A20 in pancreatic islets, were transplanted with  
 1365 a congenic bone marrow mixture from *Tnfaip3*<sup>+/+</sup> CD45.1<sup>+</sup> TCR<sup>3A9</sup>-transgenic donors, to  
 1366 serve as an internal control, and CD45.2 TCR<sup>3A9</sup>-transgenic donors with either  
 1367 *Tnfaip3*<sup>I325N/I325N</sup> (black circles) or *Tnfaip3*<sup>+/+</sup> (grey circles) genotype. **(A)** Incidence of  
 1368 diabetes in insHEL-transgenic recipients as a function of time after transplantation (*n*=12  
 1369 chimeras for +/+ and 14 chimeras for I325N/I325N pooled from 2 separate experiments). **(B)**  
 1370 Frequency of TCR<sup>3A9</sup> positive CD4<sup>+</sup> T cells among CD45.2<sup>+</sup> *Tnfaip3*<sup>+/+</sup> (grey circles) or  
 1371 *Tnfaip3*<sup>I325N/I325N</sup> (black circles) lymphocytes in pancreatic lymph nodes. Test recipients  
 1372 expressed the insHEL antigen in pancreatic islets (insHEL-transgenic), while parallel non-  
 1373 transgenic recipients lacked the autoantigen. **(C)** Percentage of CD45.2<sup>+</sup> *Tnfaip3*<sup>+/+</sup> (grey  
 1374 circles) or *Tnfaip3*<sup>I325N/I325N</sup> (black circles) cells among TCR<sup>3A9</sup> CD4<sup>+</sup> T cells in spleen. **(D-  
 1375 F)** Analysis of insHEL transgenic recipients. Relative mean fluorescence intensity (MFI) of  
 1376 staining for cell surface MHC class II or CD86 on CD45.2<sup>+</sup> *Tnfaip3*<sup>+/+</sup> (grey circles) or  
 1377 *Tnfaip3*<sup>I325N/I325N</sup> (black circles) B cells (D) or CD11c<sup>+</sup> dendritic cells (E), compared to  
 1378 CD45.1<sup>+</sup> *Tnfaip3*<sup>+/+</sup> B cells or dendritic cells in the same sample. **(F)** Frequency of germinal  
 1379 center (GC) B cells among CD45.2<sup>+</sup> B cells (black circles) compared to the frequency among  
 1380 CD45.1<sup>+</sup> *Tnfaip3*<sup>+/+</sup> B cells in the same animal (linked by lines). Left panel, CD45.2  
 1381 *Tnfaip3*<sup>+/+</sup> marrow donor; right panel, CD45.2 *Tnfaip3*<sup>I325N/I325N</sup> marrow donor. In (B-F),

1382 each symbol, or pair of symbols joined by a line, represents one chimeric mouse, all analyzed  
1383 in a single experiment. Statistical analysis by 2-tailed Student's *t*-tests: \* $P < 0.05$ ; \*\* $P <$   
1384  $0.01$ ; \*\*\* $P < 0.001$ .  
1385



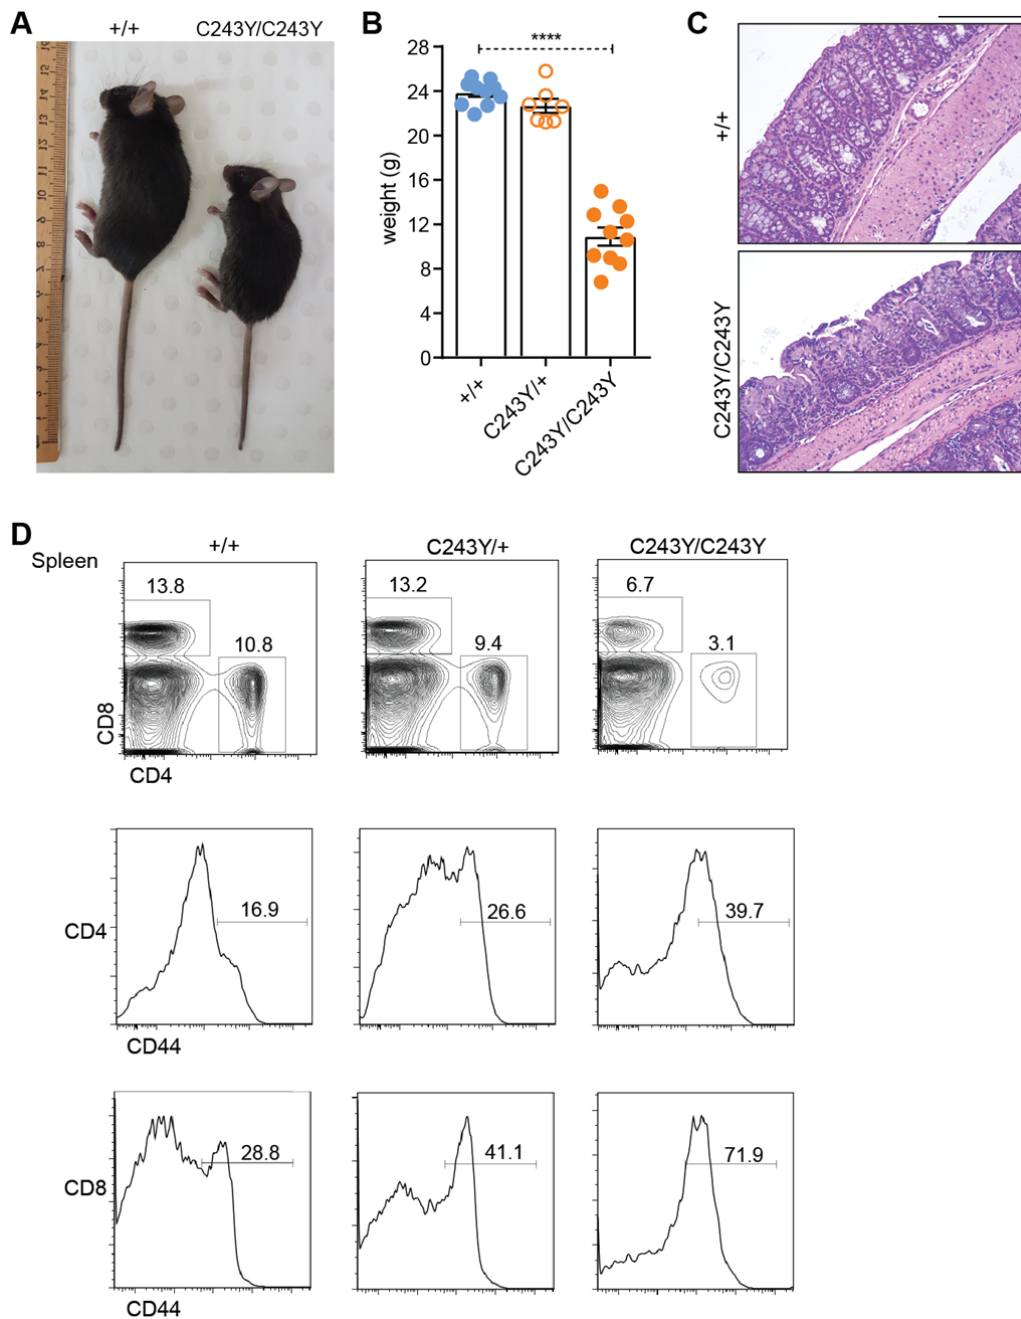

1386

1387

### Extended Data Fig. 20.

1388

**Histological analysis and immune phenotyping of  $A20^{C243Y}$  mice.** (A) Representative photo of 8 week-old female  $Tnfaip3^{+/+}$  and  $Tnfaip3^{C243Y/C243Y}$  mice. Statistical analysis by one-way ANOVA: \*\*\*\* $P < 0.0001$ .

1389

(B) Weights (g) 8 week-old male  $Tnfaip3^{+/+}$ ,

1390

$Tnfaip3^{C243Y/C243Y}$  and  $Tnfaip3^{C243Y/C243Y}$  mice. (C) Hematoxylin and eosin stained sections of colon from representative female mice in (A) (scale = 200  $\mu$ m).

1391

(D) Flow cytometry of the percent CD4<sup>+</sup> and CD8<sup>+</sup> splenocytes (top panel) and the percentage of each subset that are CD44<sup>hi</sup> activated/memory cells (histograms).

1392

1393

1394

1395

1396 **Extended Data Table 1.**

1397 Allele frequencies of the Denisovan T108A;I207L haplotype in the Simons Genome

1398 Diversity Project<sup>22</sup>, as presented in (Extended Data Fig. 2B).

| <b>Region</b>             | <b>Denisovan<br/><i>TNFAIP3</i><br/>alleles</b> | <b>Total<br/><i>TNFAIP3</i><br/>alleles</b> | <b>Denisovan<br/>allele<br/>frequency</b> |
|---------------------------|-------------------------------------------------|---------------------------------------------|-------------------------------------------|
| Africa                    | 0                                               | 88                                          | 0.00                                      |
| West Eurasia              | 0                                               | 150                                         | 0.00                                      |
| Central Asia              | 0                                               | 54                                          | 0.00                                      |
| South Asia                | 0                                               | 78                                          | 0.00                                      |
| East Asia                 | 0                                               | 94                                          | 0.00                                      |
| Americas                  | 0                                               | 44                                          | 0.00                                      |
| Oceania & Island SE Asia: | 23                                              | 50                                          | 0.46                                      |
| (Brunei)                  | 1                                               | 4                                           | 0.25                                      |
| (Australia)               | 1                                               | 4                                           | 0.25                                      |
| (Papua New Guinea)        | 19                                              | 30                                          | 0.63                                      |
| (Bougainville)            | 1                                               | 4                                           | 0.25                                      |
| (New Zealand)             | 1                                               | 2                                           | 0.50                                      |

1399

1400 **Extended Data Table 2.**

1401 Polymorphic observed (black) and imputed (red) variants within a putatively adaptively  
1402 introgressed haplotype in Melanesians (6:138160925-138246514, <sup>29</sup>). Ancestral, modern  
1403 human (b37), Denisovan, and Altai Neanderthal genotypes are shown at each position for  
1404 comparison. Genomic coordinates are based upon the hg19 reference.

| Chr | Position  | rsID        | Missense | Ancestral | b37 | Denisovan | Altai Neanderthal |
|-----|-----------|-------------|----------|-----------|-----|-----------|-------------------|
| 6   | 138161013 | rs6918329   |          | G         | A   | G         | G                 |
| 6   | 138174328 | rs2027276   |          | C         | A   | A         | C                 |
| 6   | 138190154 | rs3757173   |          | G         | A   | A         | G                 |
| 6   | 138195402 | rs596493    |          | C         | T   | C         | C                 |
| 6   | 138196008 | rs376205580 | T108A    | A         | A   | G         | A                 |
| 6   | 138196957 | rs141807543 | I207L    | A         | A   | C         | A                 |
| 6   | 138223082 | rs17066926  |          | C         | T   | C         | C                 |
| 6   | 138241185 | rs4895499   |          | G         | A   | G         | G                 |

1405

1406 **Extended Data Table 3.**

1407 Mouse primers used for qRT-PCR analysis of genes. Designed using Primer3 with sequences  
 1408 obtained from GenBank and synthesised by Sigma Aldrich (Australia). Primers from Roche  
 1409 Universal ProbeLibrary (UPL) System Assay are indicated.

| Gene                          | Primer sequence                                                          |
|-------------------------------|--------------------------------------------------------------------------|
| <i>Tnfrsf3</i>                | F-5'-CCTGTCACCAACGCTCCAAG-3'<br>R-5'-ATTTCCAGTCCGGTGGCAAG-3'             |
| <i>Ccl2</i>                   | F- 5'-GGTCCCTGTCATGCTTCTGG-3'<br>R- 5'-CCTGCTGCTGGTGATCCTCT-3'           |
| <i>Cph2</i>                   | F- 5'-TGGACCAAACACAAACGGTTCC-3'<br>R- 5'-ACATTGCGAGCAGATGGGGT-3'         |
| <i>Cxcl1</i>                  | F- 5'-TGGCTGGGATTCACCTCAAG-3'<br>R- 5'-TATGACTTCGGTTTGGGTGCAG-3'         |
| <i>Cxcl10</i>                 | F- 5'-GACGGGCCAGTGAGAATGAG-3'<br>R- 5'-GTGTGTGCGTGGCTTCACTC-3'           |
| <i>Icam1</i>                  | F- 5'-CCATGGGAATGTCACCAGGA-3'<br>R- 5'-ATCACGAGGCCCAATGAC-3'             |
| <i>Il6</i>                    | F- 5'-TCCTTCCTACCCCAATTTCAA-3'<br>R- 5'-TGGATGGTCTTGGTCCTTAGCC-3'        |
| <i>Il1b</i><br>UPL probe #38  | F- 5'-AGTTGACGGACCCCAAAG-3'<br>R- 5'-AGCTGGATGCTCTCATCAGG-3'             |
| <i>Rpl19</i><br>UPL probe #46 | F- 5'-CCACAAGCTCTTTCCTTTCG-3'<br>R- 5'-GGATCCAACCAGACCTTCTTT-3'          |
| <i>Il6</i><br>UPL probe #28   | F- 5'-GCTACCAAACCTGGATATAATCAGGA-3'<br>R- 5'-CCAGGTAGCTATGGTACTCCAGAA-3' |
| <i>CVB4</i><br>UPL probe #41  | F- 5'-CCCGGACCGAGTATCAATAA-3'<br>R- 5'-CCGGGTAACGAACGGTTT-3'             |
| <i>Ifnb</i><br>UPL probe #78  | F- 5'-CACAGCCCTCTCCATCAACTA-3'<br>R- 5'-CATTTCCGAATGTTCGTCCT-3'          |

1410

1411 **Extended Data Table 4.**

1412 Human primers used for qRT-PCR analysis of genes. Designed using Primer3 with sequences  
1413 obtained from GenBank and synthesised by Sigma Aldrich (Australia).

|                |                                                                      |
|----------------|----------------------------------------------------------------------|
| <i>TNFAIP3</i> | F- 5'-AACGAACGGTGACGGCAAT-3'<br>R- 5'-GAAGTCCACTTCGGGCCAT-3'         |
| <i>TNF</i>     | F- 5'-TCCCCTGGAAAGGACACCAT-3'<br>R- 5'GGGTTTGCTACAACATGGGCT-3'       |
| <i>CXCL2</i>   | F- 5'-AGGGAATTCACCTCAAGAACATCC-3'<br>R- 5'-TGTGGCTATGACTTCGGTTTGG-3' |
| <i>RPL13A</i>  | F- 5'-CAAGCGGATGAACACCAAC-3'<br>R- 5'-TGTGGGGCAGCATAACCTC-3'         |
| <i>ACTB</i>    | F- 5'-CATCGAGCACGGCATCGTCA-3'<br>R- 5'-TAGCACAGCCTGGATAGCAAC-3'.     |

1414

1415 **Extended Data Table 5.**

1416 Data collection and refinement statistics (molecular replacement).

|                                                     | I325N human<br>(PDB code 5V3P)        | WT human<br>(PDB code<br>5V3B)        | WT mouse<br>(PDB code<br>5DQ6)          |
|-----------------------------------------------------|---------------------------------------|---------------------------------------|-----------------------------------------|
| <b>Data collection</b>                              |                                       |                                       |                                         |
| Space group                                         | P3 <sub>1</sub>                       | P2 <sub>1</sub>                       | P3 <sub>2</sub>                         |
| Cell dimensions                                     |                                       |                                       |                                         |
| <i>a</i> , <i>b</i> , <i>c</i> (Å)                  | 81.9, 81.9, 297.3                     | 98.7, 80.9, 153.4                     | 71.3, 71.3, 143.2                       |
| <i>a</i> , <i>b</i> , <i>g</i> (°)                  | 90.0, 90.0, 120.0                     | 90.0, 102.5, 90.0                     | 90.0, 90.0, 120.0                       |
| Resolution (Å)                                      | 2.5-40.6 (2.50-<br>2.55) <sup>a</sup> | 3.0-34.56 (3.0-<br>3.10) <sup>a</sup> | 2.80-37.77 (2.80-<br>2.93) <sup>a</sup> |
| <i>R</i> <sub>pim</sub> (all I+ & I-) <sup>b</sup>  | 0.076 (0.471)                         | 0.056 (0.687)                         | 0.033 (0.398)                           |
| <i>I</i> / <i>s(I)</i>                              | 7.8 (2.2)                             | 9.9 (1.5)                             | 12.0 (1.42)                             |
| <i>CC</i> <sub>1/2</sub>                            | 0.929 (0.713)                         | 0.994 (0.703)                         | 0.996 (0.782)                           |
| Completeness (%)                                    | 99.7 (100.0)                          | 97.7 (99.1)                           | 96.07 (98.30)                           |
| Redundancy                                          | 4.5 (4.6)                             | 5.3 (5.6)                             | 4.3 (4.3)                               |
| Wilson B (Å <sup>2</sup> )                          | 47.7                                  | 79.0                                  | 90.8                                    |
| <b>Refinement</b>                                   |                                       |                                       |                                         |
| Resolution (Å)                                      | 2.50-39.47                            | 3.0-34.56                             | 2.8-37.77                               |
| No. reflections                                     | 73040                                 | 44077                                 | 19279                                   |
| <i>R</i> <sub>work</sub> / <i>R</i> <sub>free</sub> | 0.161/0.200                           | 0.238/0.282                           | 0.253/0.291                             |
| No. atoms                                           |                                       |                                       |                                         |
| Protein                                             | 17465                                 | 14207                                 | 5511                                    |
| Water                                               | 21                                    | -                                     | 26                                      |
| <i>B</i> factors average                            |                                       |                                       |                                         |
| Protein                                             | 55.4                                  | 77.3                                  | 122                                     |
| Water                                               | 23.4                                  | -                                     | 109                                     |
| R.m.s. deviations                                   |                                       |                                       |                                         |
| Bond lengths (Å)                                    | 0.0115                                | 0.0117                                | 0.011                                   |
| Bond angles (°)                                     | 1.54                                  | 1.53                                  | 1.43                                    |

1417
